# Supplementary material for: Discovery of a new repeat family in the Callithrix jacchus genome
Source: HighWire-hosted journal article supplement (doi:10.1101/gr.199075.115), 2016-02-25
Supplement: Supp_Material.docx [file Supp_Material.docx]

Supplemental Material

# Table of Contents

**Supplemental Methods**……………………………………………………………………………….page 2-5

S1 Subfamily reconstruction…………………………………………...…………………...…………page 2-3

S2 Neighbor Joining and Network analyses…………………………..…………………………page 3

S3 Intra-chromosomal Platy-1 distribution simulation……………..……………………..page 4

S4 Primer design…………………………………………………………………..……………………….page 4

S5 Sanger sequencing…………………………………………………………..………….……………..page 4-5

**Supplemental information**…………………………………………………………………………page 5-8

S6 Platy-1 subfamily reconstruction………………………………………………..……………..page 5-6

S7 Intra- and intrachromosomal Platy-1 distribution…………………………..………….page 7

S8 Amplicon size variation……………………………………………………………..……………...page 7-8

**Supplemental Figures**………………………………………………………………………………….page 9-11

Figure S1……………………………………………………………………………………………………….page 9

Figure S2……………………………………………………………………………………………………….page 10

Figure S3A…………………………………………………………………………………………………….page 11

Figure S3B…………………………………………………………………………………………………….page 12

Figure S4………………………………………………………………………………………………………page 13

Figure S5………………………………………………………………………………………………………page 14

Figure S6………………………………………………………………………………………………………page 15

**Supplemental references**………………………………….…………………………………………page 16-17

## Supplemental Methods

### S1 Subfamily reconstruction

We queried the original Platy-1 sequence against the common marmoset genome [calJac3] and aligned the ten best matches (Supplemental Fig. S6) to reconstruct a preliminary consensus sequence (GGGGGTCCAAAGTGGCTCCGGCCGGATGTCGTGGCGCTTGCGAAGGCGA

GGTCATGAGTTCAAGGCTAACCTGAGCAACCTTACAAGCTCACACTGATTGGCAAAA) that we used for our initial downstream analyses. We included the query sequence in a custom library that also included sequences from the repeat library available from Repbase (girinst.org/repbase). The local RepeatMasker program was run using the default settings, together with the following customizations: “slow” option; specification of our custom library; parallelization; and rich output. We retrieved all full-length Platy-1 candidate loci with custom BioPython scripts and the twobitreader package (Cock et al. 2009; Schiller 2013).

For our subfamily reconstruction, we generally required the presence of at least two substitutions in conjunction with identification of at least 15 elements for subfamily determination. However, we allowed for a single nucleotide polymorphism and smaller subfamilies if the average divergence of a subfamily was <5%, as well as satisfaction of one of the following criteria:

(1) For non-CpG mutations, we required that at least 10 elements shared this SNP.

(2) Since CpG sites mutate roughly six times faster than non-CpG sites (Xing et al. 2004), these sites were considered diagnostic mutations if at least 15 elements shared the SNP and one or more elements matched the consensus sequence perfectly.

(3) If a subfamily harbored at least three identical elements, we considered elements that shared the same mutations as a separate subfamily. Under all other circumstances, substitutions were considered random mutations and, consequently, these elements were not grouped into separate subfamilies.

Following a RepeatMasker analysis, we retrieved all full-length Platy-1 elements, created separate files for each subfamily, and estimated the size of each subfamily based on the RepeatMasker output. For each subfamily, we aligned all full-length Platy-1 elements against their respective consensus sequence using MUSCLE (Edgar 2004) and screened the alignments for accuracy, minimum criteria met for subfamily determination, and evidence for additional subfamilies. If we discovered subfamily substructure or noticed that RepeatMasker identified fewer elements than the above-described thresholds, we modified the library accordingly and re-ran the analysis.

We further investigated Platy-1 elements harboring an asterisk in the RepeatMasker output (an indication for a higher-scoring match with partial overlap), as these putative Platy-1 loci have a higher chance of being false positives. We determined that loci with <11% divergence and with no or only minor deletions or insertions (<3%) from their respective consensus sequence most likely represented true Platy-1 insertions; these were included in our dataset of full-length Platy-1 insertions. All other loci were manually analyzed.

### S2 Neighbor-Joining and Network analyses

Following our initial Neighbor-Joining (Felsenstein 1989) analysis, we noticed that subfamilies with shared deletions were not identified as closely related. Toward overcoming this issue, we re-ran the analysis with modified Platy-1 subfamilies where only one nucleotide was deleted, in regions with deletion-encompassing multiple nucleotides. However, the outcome was still unsatisfactory in these cases (data not shown). For the two groups of subfamilies with deletions, we manually moved subfamilies because these subfamilies evolved most likely from each other, as the independent re-occurrence of same deletion is unlikely.

We converted the Fasta alignment file of all Platy-1 consensus sequences to the by Network (Bandelt et al. 1999) required Roehl input format with dnasp, version 5.10.1 (Librado and Rozas 2009). During our Network analyses, we noticed similar inconsistencies with subfamilies containing indels. Instead of counting an indel as one event, every nucleotide was counted separately, resulting in longer branch lengths. We modified indels in a way that only one nucleotide difference remained. Moreover, the two deletion subfamily groups were grouped together, likely because of a partial overlap of the deletions. However, these deletions appear to have occurred independently based on the presence of diagnostic mutations. Thus, we separated these subfamilies manually and placed them on the Network output accordingly.

### S3 Simulation for intrachromosomal Platy-1 distribution

Toward illustrating the distribution of Platy-1 insertions across the marmoset genome, we plotted Platy-1 insertions using a modified version of the “karyoplot” codebase by Alexandros Kanterakis (https://gist.github.com/kantale/e390cf7a47c4afdff9e4). Karyoplot was constructed using the Python Matplotlib library; our use was in combination with a custom mobile element analysis codebase. For our random insertion simulation, we conducted 1000 random simulations of insertions within each chromosome, using the length of the respective calJac3.2 marmoset chromosomes, and the observed number of Platy-1 insertions per chromosome. We used the Python-based pyplot and pandas for the visualization of our simulated and observed Platy-1 distance data.

### S4 Primer design

When possible, we designed primers in conserved regions across all sequences; repetitive regions were avoided. However, due to the high repeat load of primate genomes and previous experiences (e.g. (Abecasis et al. 2010; Stewart et al. 2011; Wu et al. 2014)), only *Alu* sequences were strictly excluded from primer design. All candidate primers were identified in the respective multiple sequence alignment to ensure that amplification across all species was likely. Moreover, each primer was queried against the *C. jacchus* draft genome assembly using BLAT (Kent 2002) to determine the uniqueness of each primer. An *in silico* PCR using the genome browser was also performed for all above mentioned species to a) ensure that only one PCR product was predicted, and b) determine the estimated filled and empty amplicon sizes. If a primer showed evidence for poor amplification based on the multiple alignment, multiple matches within the *C. jacchus* genome, or more than one amplicon, the primer design step was repeated. Only primers that passed all three quality control steps were selected for our downstream PCR analyses, and ordered from Sigma Aldrich.

### S5 Chain-termination Sequencing

For chain-termination Sanger sequencing (Sanger et al. 1977), DNA amplicons were cut out under UV visualization and purified with the Wizard SV gel and PCR cleanup system using the manufacturer’s recommendations. The final step was slightly modified by repeating this step. Next, the fluid was evaporated using a SpeedVac with a setting of 60C to accelerate the drying process. Following re-suspension of the purified DNA in 20 µl DNAse free water, chain-termination sequencing was set up. Following Sanger sequencing, we aligned the sequence reads against the respective multiple species alignments and determined the origin of the sequence length discrepancy.

### Supplemental Information

## S6 Platy-1 subfamily reconstruction

Utilizing the knowledge that a small number of source elements are responsible for the bulk of non-LTR retrotransposon insertions (Batzer and Deininger 2002; Cordaux et al. 2009; Konkel et al. 2010), we determined subfamilies using a majority rule approach. In subfamily reconstruction, one challenge is the accurate determination of subfamilies (Han et al. 2005; Konkel et al. 2010). A diagnostic mutation is the result of a source element accumulating a non-debilitating mutation – most commonly a SNP, but deletions and insertions are also possible – and consequently transmitting the mutation to future offspring elements. Other mutations are acquired randomly post insertion and/or (less commonly) during replication or TPRT. Distinguishing diagnostic from random mutations is particularly difficult for older elements with a higher chance of accumulated substitutions. This is particularly true for CpG sites, because these sites generally mutate at a faster rate (Bird 1980; Nachman and Crowell 2000; Kong et al. 2012). CpG sites within *Alu* elements accumulate mutations about six times faster compared to non-CpG substitutions (Xing et al. 2004).

At the same time, younger subfamilies tend to have accumulated more diagnostic mutations. Thus, a minimum number of elements per subfamily, and more than one independent substitution, are commonly required for subfamily classification (Price et al. 2004; Han et al. 2007). However, these mutations occur in a sequential manner. Consequently, this approach may result in a simplified subfamily structure with the absence of some intermediate subfamilies. In addition, the youngest subfamilies may not be identified, and the average age of subfamilies is skewed toward more ancient propagation. To engage these challenges, Coseg uses a multistep approach where, in downstream analyses, single substitutions and intermediates between subfamilies are allowed under certain circumstances (Smit 2008-2015; Smit 2013-2015).

The length of Platy-1 and the repeat family’s relatively small size represent additional challenges to the common difficulties of subfamily reconstruction (i.e. accurately distinguishing diagnostic from random mutations). Consequently, we allowed for the presence of a single SNP to define a subfamily under certain circumstances toward realizing a more refined subfamily structure of the end branches (i.e. young subfamilies). This permitted the identification of a higher number of elements pristine to the consensus sequence. Arguably, these elements are the most interesting sequences as they may be source elements and indicate that retrotransposition is either ongoing or happened until very recently. Under the applied constraints, we believe that the possibility of over-estimating the number of Platy-1 subfamilies is relatively low; and the benefits, such as identification of most subfamilies and higher accuracy in estimating the divergence of subfamilies, altogether outweigh the risks such as reconstruction of artificial subfamilies, underestimation of age, and potentially lengthened computation time.

While aspirationally we would apply the same requirements to older subfamilies, we realized we did not have enough accuracy to distinguish random mutations from diagnostic ones. Contributing factors likely include mutation saturation and the relatively low number of elements early in the evolution of Platy-1, which may be attributed – at least in part – to the presence of only one or a few source elements. Even assuming a neutral model for Platy-1 insertions, shown for other non-LTR retrotransposons (Cordaux et al. 2006; Belancio et al. 2008), most new elements are lost from the genome and do not reach fixation. Consequently, we likely underestimate the number of older subfamilies. This is a common phenomenon; all long-lived repeat families experience these constraints to varying degrees based on the constellation of age, element length, and number of elements that reached fixation in the genome. Our analysis of the propagation dynamics of individual Platy-1 subfamilies indicates that some subfamilies were active relatively early in NWM evolution and ceased retrotransposition, while others are of more recent origin and likely have maintained their propagation capabilities. Moreover, some subfamilies were active over prolonged time periods, while others ceased more quickly.

### S7 Platy-1 intra- and intra-chromosomal distribution

Our analyses show an uneven interchromosomal Play-1 distribution across the genome, with some chromosomes containing higher and other chromosomes lower than expected densities. To elucidate the intrachromosomal distribution, we plotted the Platy-1 insertions onto the chromosomes, omitting only elements present in unscaffolded contigs as shown in the ideogram in Fig. S2A. On some chromosomes we noted larger apparent distances between neighboring Platy-1 insertions. This raised questions whether these insertions might indeed be consistent with a random insertion model. However, a clear pattern was not discernable. Toward elucidating this, we conducted 1000 random simulations of insertions within each chromosome, using the length of the respective calJac3.2 marmoset chromosomes, and the observed number of Platy-1 insertions. In Fig. S2, we over-plotted these between-insertion distances per-chromosome (in gray), with the observed distribution in black. Overall, the random insertion model shows a similar Platy-1 distribution as the observed one in the common marmoset genome.

### S8 Amplicon size variation

For three Platy-1 insertions, we could not confirm the presence of the insertions on our phylogenetic panel, even though the element appeared present in the common marmoset reference genome. To determine if the element was present in other marmosets than the one included on our phylogenetic panel (we did not have access to the DNA of the common marmoset that was sequenced), we tested this candidate locus on our population panel. The population panel contains 24 *C. jacchus* individuals from three different US primate centers (Supplemental Tables S1B, S8). However, the presence of the putative Platy-1 element could not be confirmed in any of the 24 common marmosets. These three Platy-1 insertions may represent private insertions – i.e. insertions unique to the sequenced individual – or elements with very low allele frequency within common marmosets. Alternately, a reference genome assembly issue could explain the absence. However, the latter appears altogether less likely, as we did not observe any inconsistencies during our previous analyses of the common marmoset genome ( The Marmoset Genome Sequencing and Analysis Consortium 2014).

The sequencing results of locus 157 are consistent with an insertion of an *Alu* element at precisely the same location as the Platy-1 insertion (Supplemental Fig. S5). Moreover, the *Alu* element is severely truncated and thus has a similar amplicon size as the Platy-1 insertion. Both elements appear to have the same TSDs. Based on insertion at the same location with the same TSDs, the insertion would be considered a precise parallel insertion, an event that is very rare (Ray et al. 2006). However, an insertion of two different repeat families occurred at the same insertion site. This observation is surprising in two respects: a) separate insertions at the same location with identical TSDs are not common, and b) the majority of *Alu* insertions are full-length and about three times larger than a Platy-1 insertion (Zingler et al. 2005; The Marmoset Genome Sequencing and Analysis Consortium 2014). In fact, only 10% of *Alu* elements are truncated, and roughly a quarter of these are 150 bp or less in length (Chen et al. 2007; Wagstaff et al. 2012). Given the shared integration site and TSDs of the Platy-1 and *Alu* sequences, an alternate explanation could be gene conversion, as shown for *Alu* elements (Kass et al. 1995; Roy et al. 2000). However, this would also require incomplete lineage sorting over an extended time period, as tamarin, capuchin, owl monkey do not contain an insertion and precise deletions are exceedingly rare (van de Lagemaat et al. 2005; Ray et al. 2006) making a parallel insertion event more favorable. While the presence of these parallel insertions may be caused by chance, it is also conceivable that the host environment may play a role in the tolerated length of an insertion given that the *Alu* element has a similar length as the Platy-1 element.

**Figure S1.** Gel chromatograph of original Platy-1 locus. Shown is an image of a gel chromatograph of PCR amplicons for the original putative Platy-1 insertion identified on chr3. The primers were run on a phylogenetic panel containing members of all three NWM families and three catarrhine outgroup species (human, chimpanzee, and Green monkey). The included species are shown on top of the gel chromatographs. The gel electrophoresis following PCR amplification was performed on a 2% agarose gel. The empty amplicon – lower band – is about 848 bp in length (based on the in silico results of human) and the filled amplicon – higher band – is about 1028 bp in length. The sizes of the filled and empty sites may vary slightly in other species due to indels. The vertical lines within the gel image from left to right separate the outgroups from the NWMs and the marmosets from the other NWM species. Common marmoset and pygmy marmoset share the insertion.

**Figure S2.** Alignment of Platy-1 consensus sequences. Shown is an alignment of 62 Platy-1 consensus sequences. The sequences are also available in FASTA format from the Batzer Lab website (https://biosci-batzerlab.biology.lsu.edu/publications.html).

**
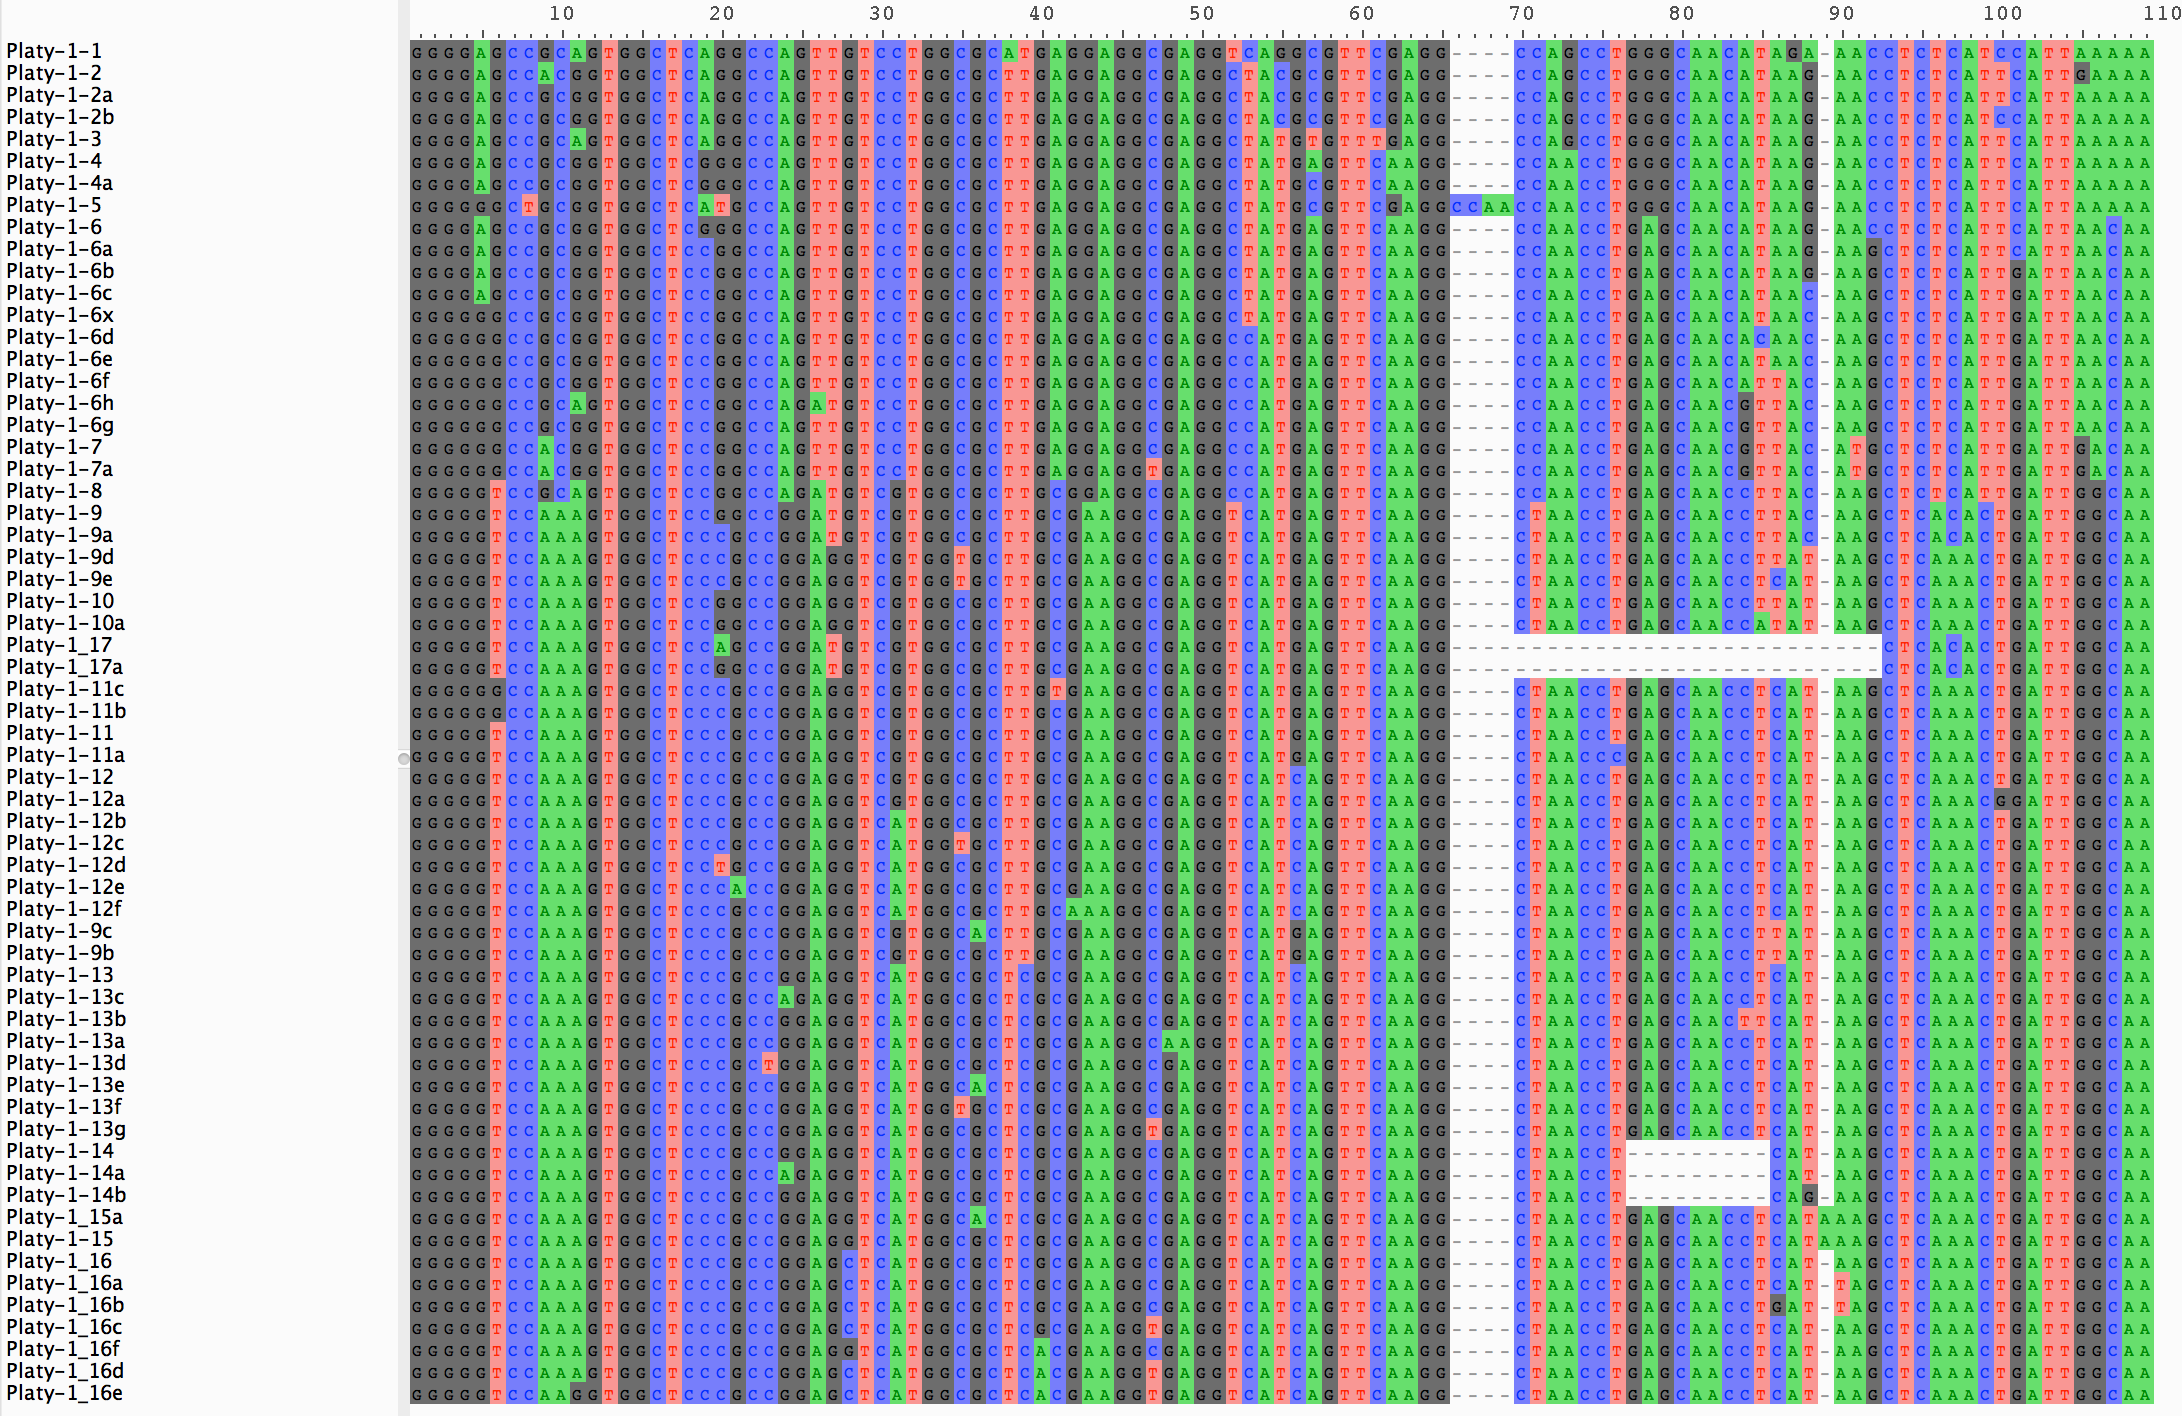
**

**Figure S3A.** Idiogram of intrachromosomal Platy-1 distribution. Shown is a chromosome ideogram with full-length Platy-1 insertion superposed onto it. For the plotting the chromosomal locations were used.

**Figure S3B.** Observed and simulated Platy-1 distribution per chromosome. Illustrated are the observed and simulated distances (assuming a random insertion model) between adjacent Platy-1 insertions. Given that the interchromosomal distribution of Fig. S3a appears to vary in distance between adjacent insertions, we simulated Platy-1 insertion distances per chromosome using the observed number of insertions per chromosome. Shown are the results of 1000 simulations per chromosome.


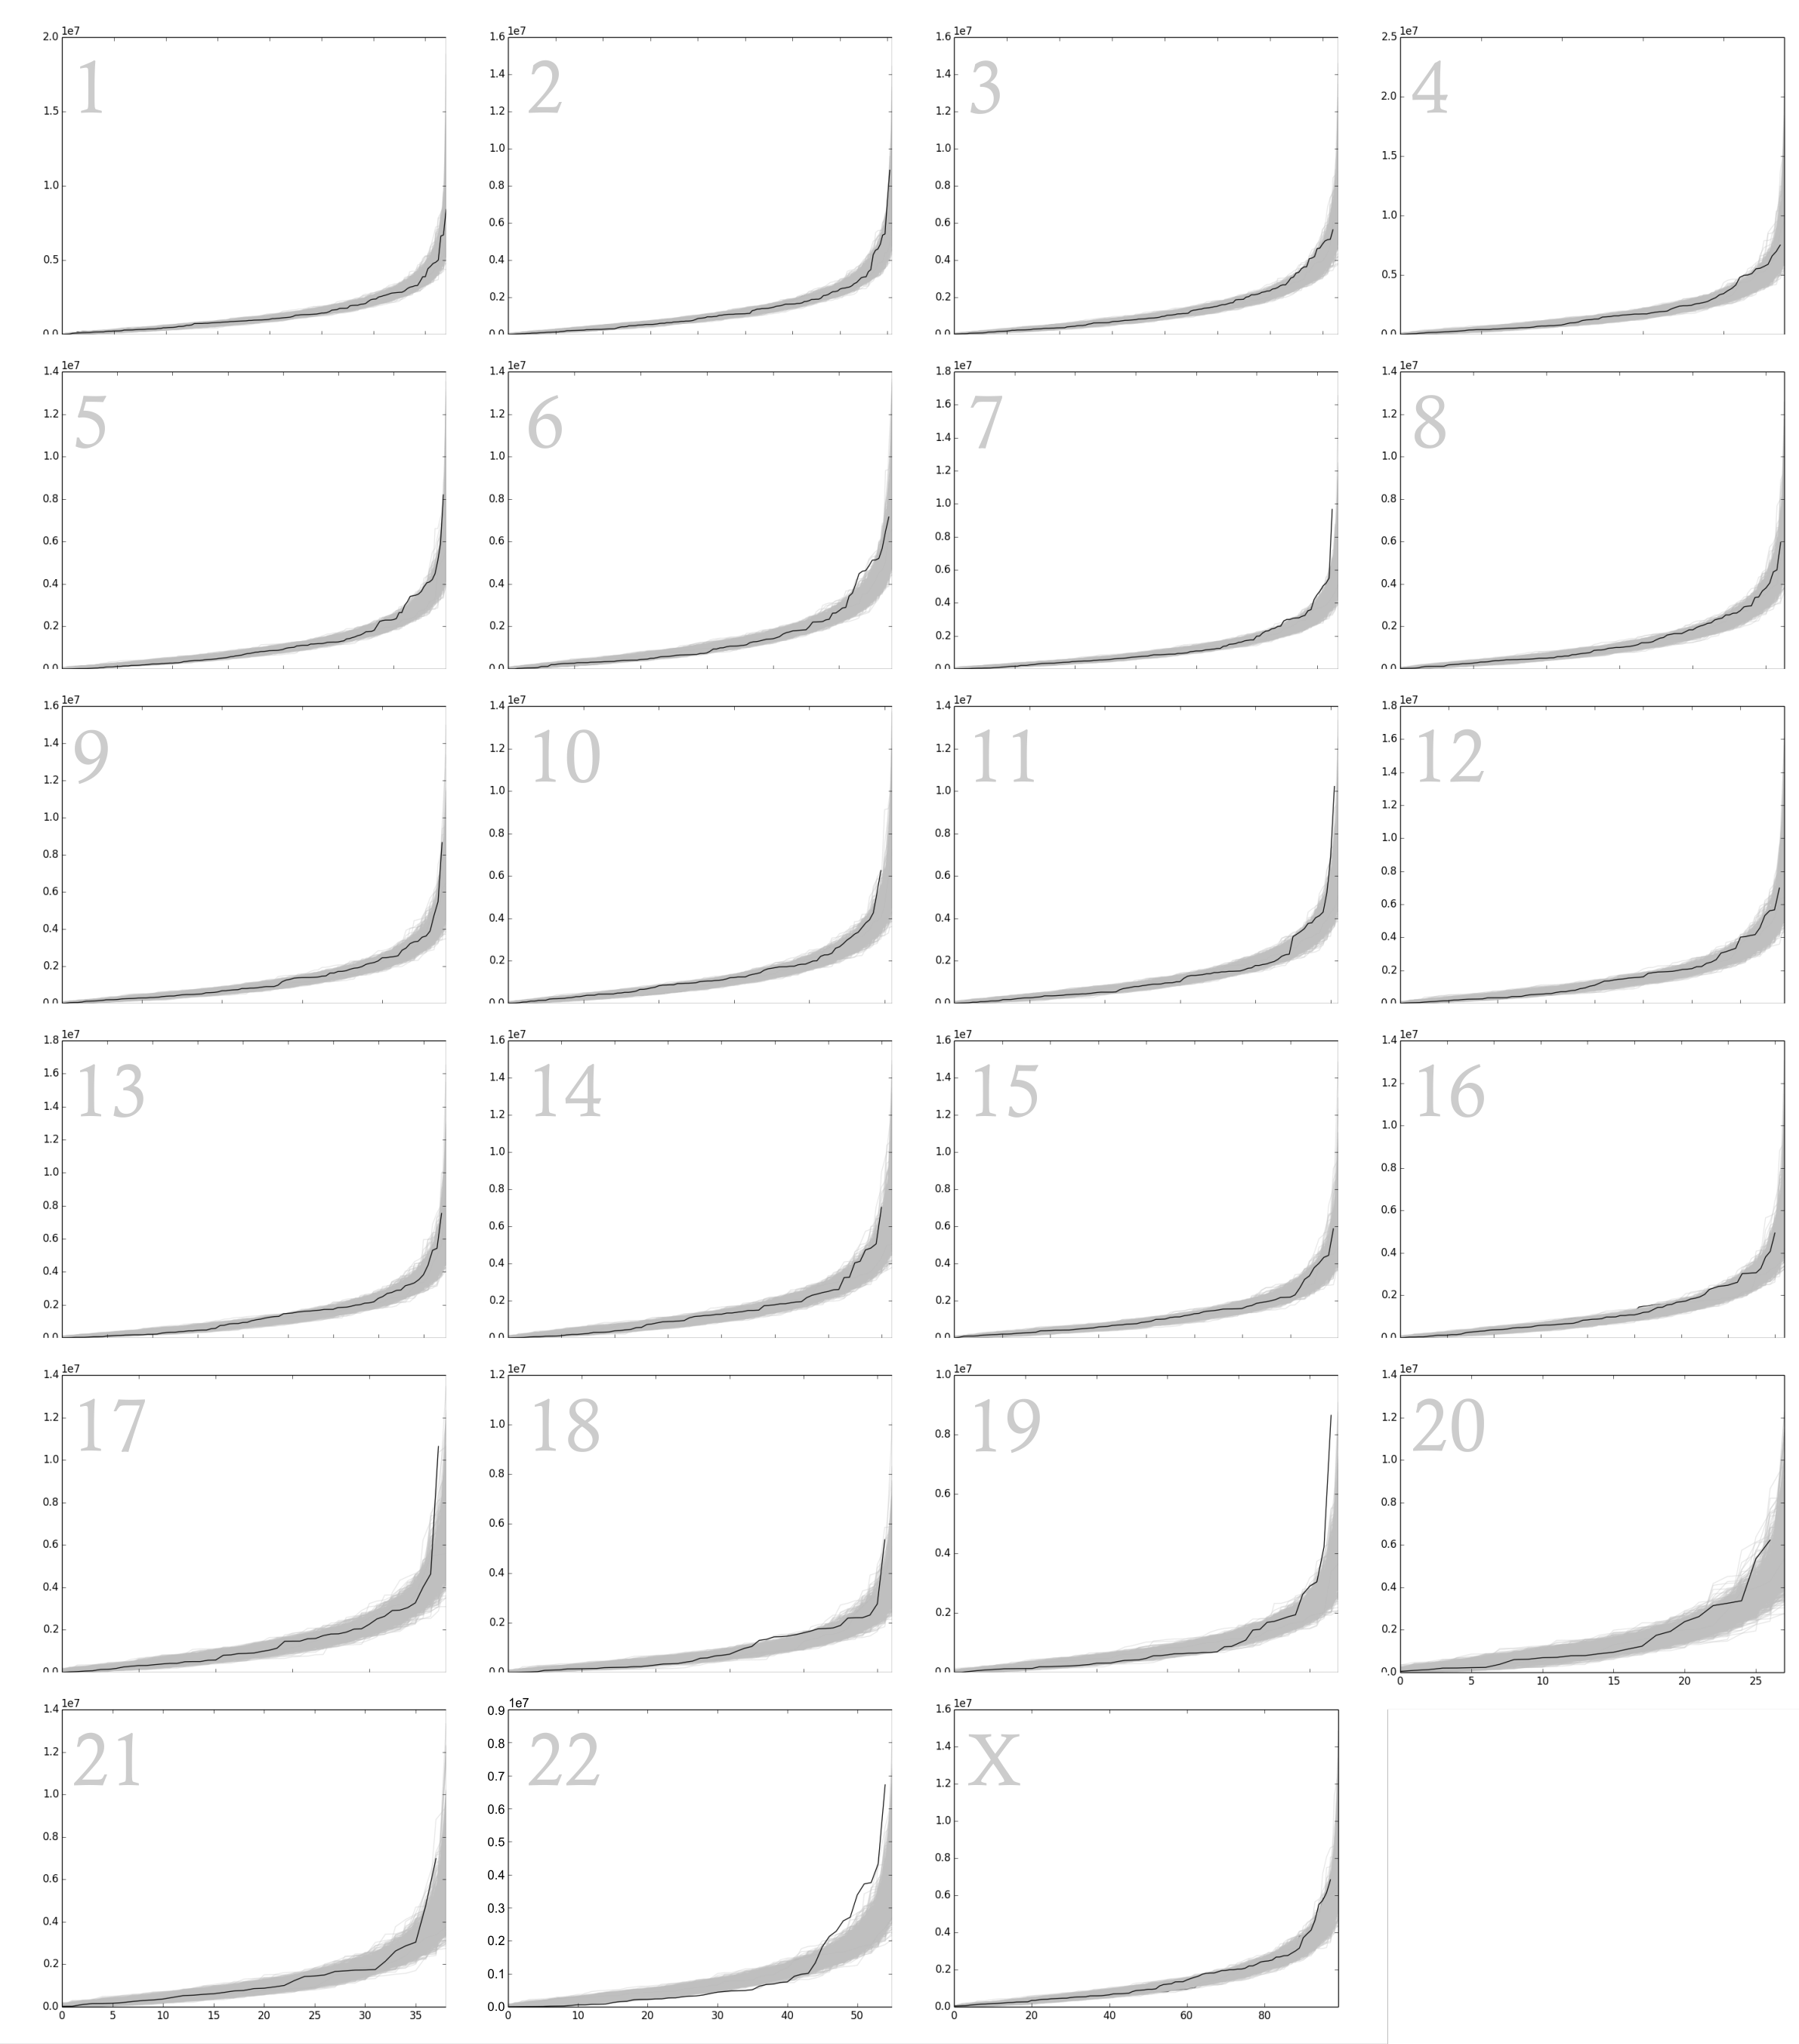


**Figure S4.** Alternate alignment of Platy-1 consensus sequences. Illustrated is an alternate alignment of the Platy-1 consensus sequences with selected *Alu* sequences and 7SL RNA sequences. The alignment was performed with MUSCLE (Edgar 2004) followed by manual curation. The data is visualized with AliView (Larsson 2014).


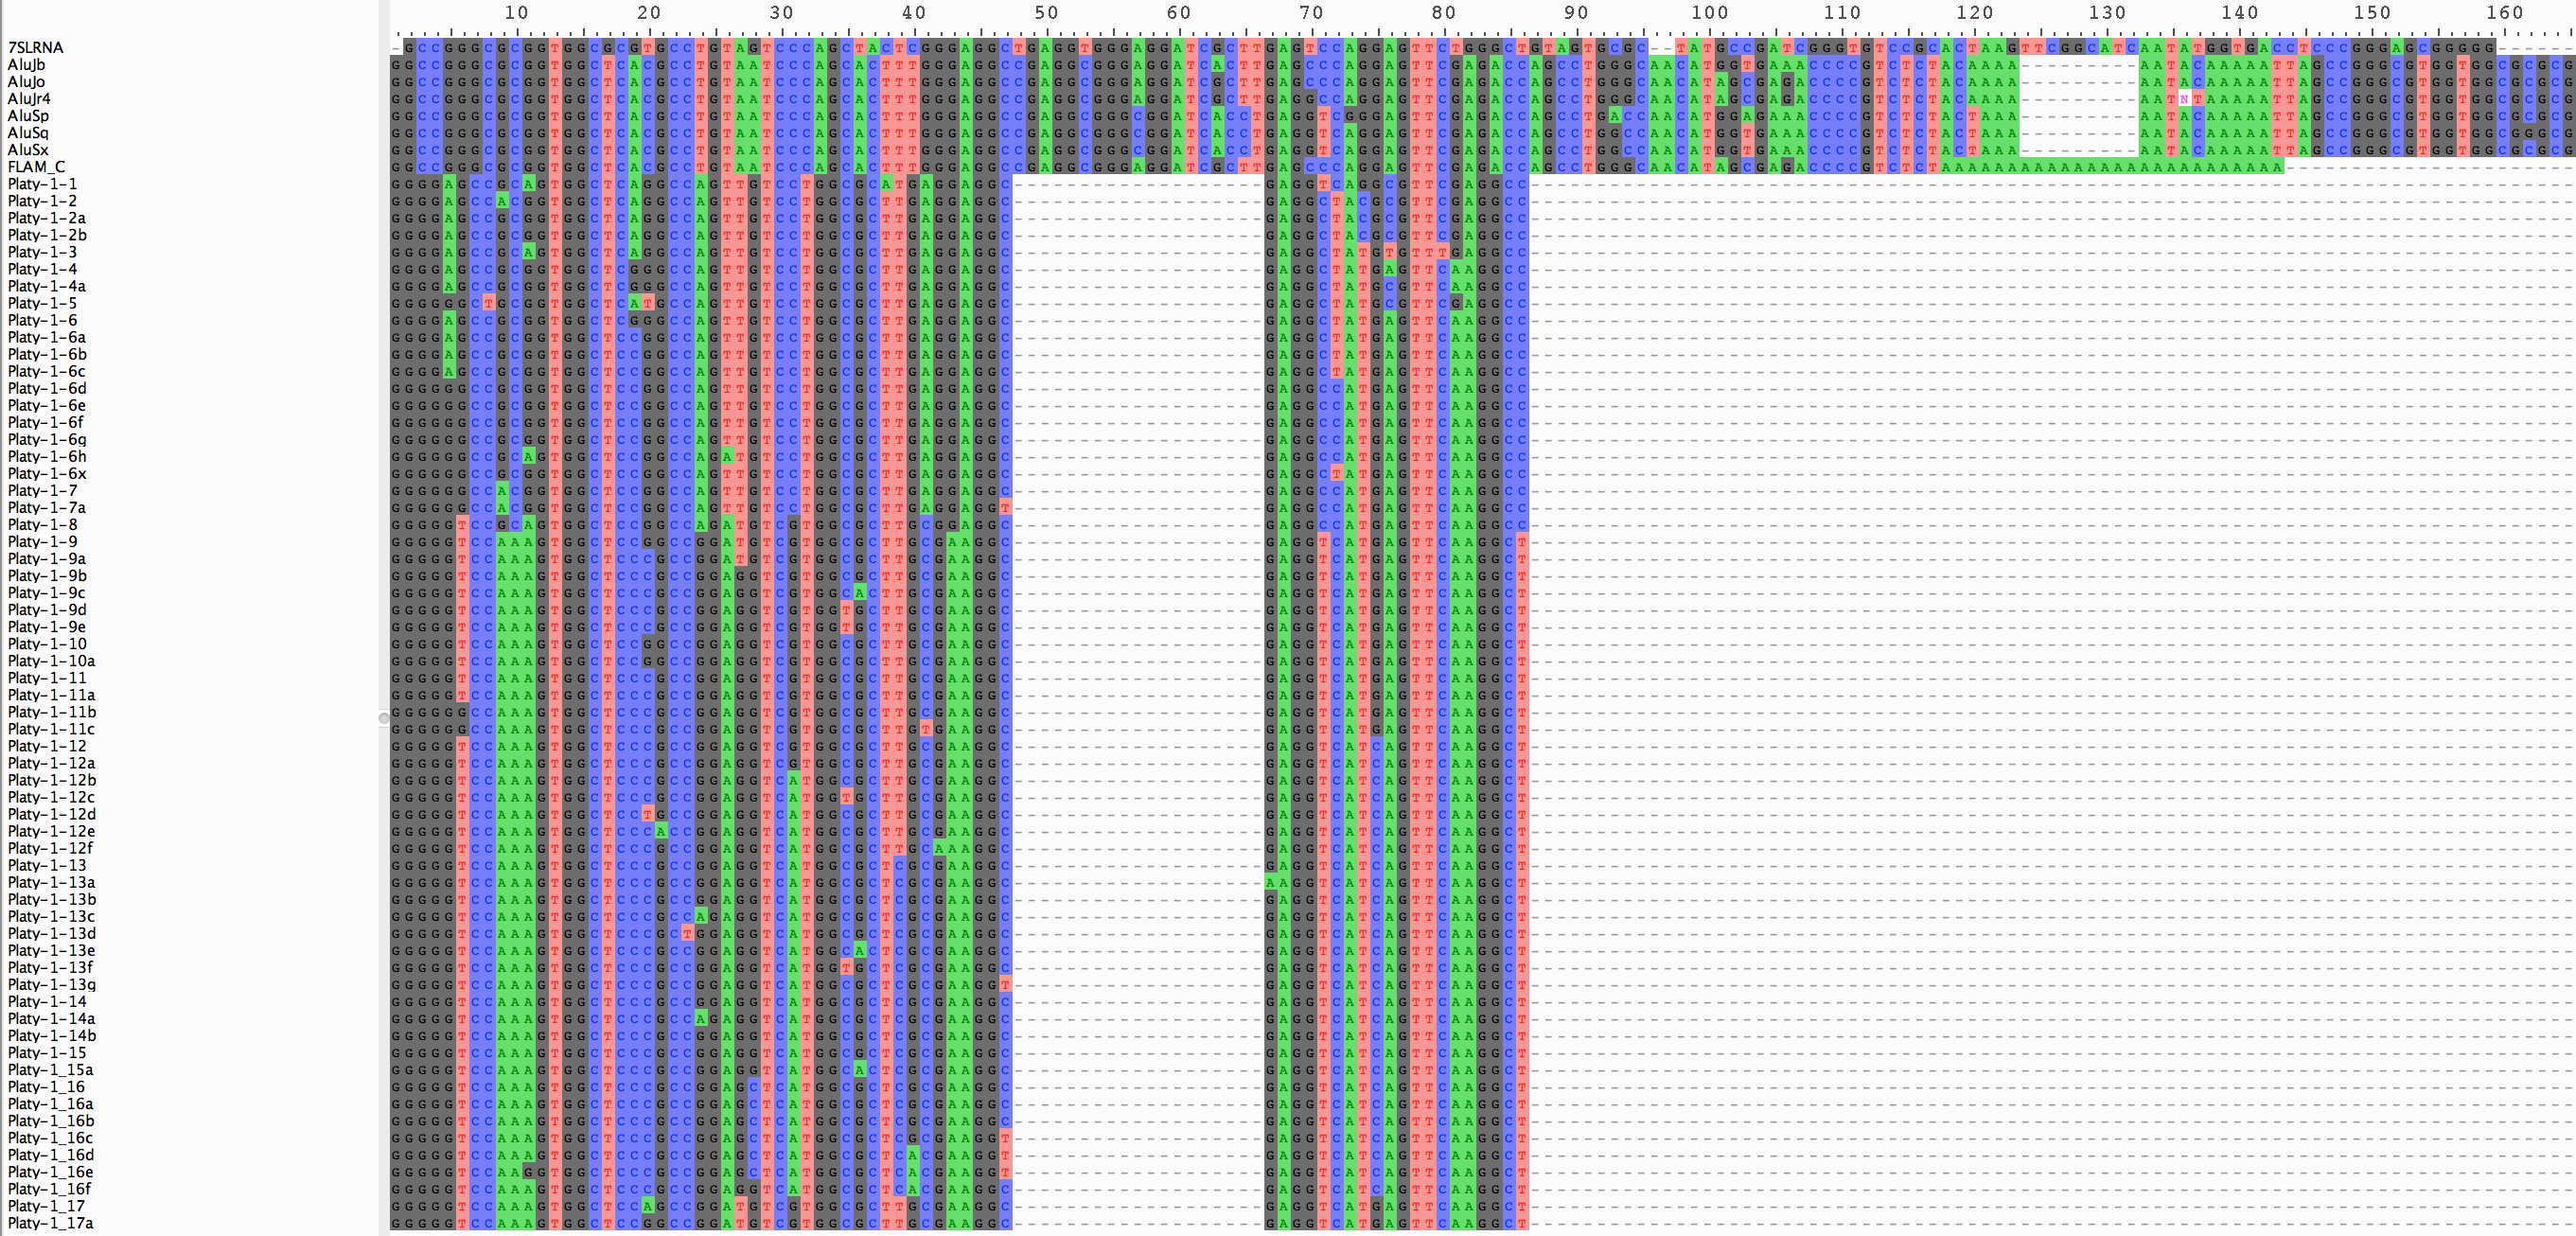


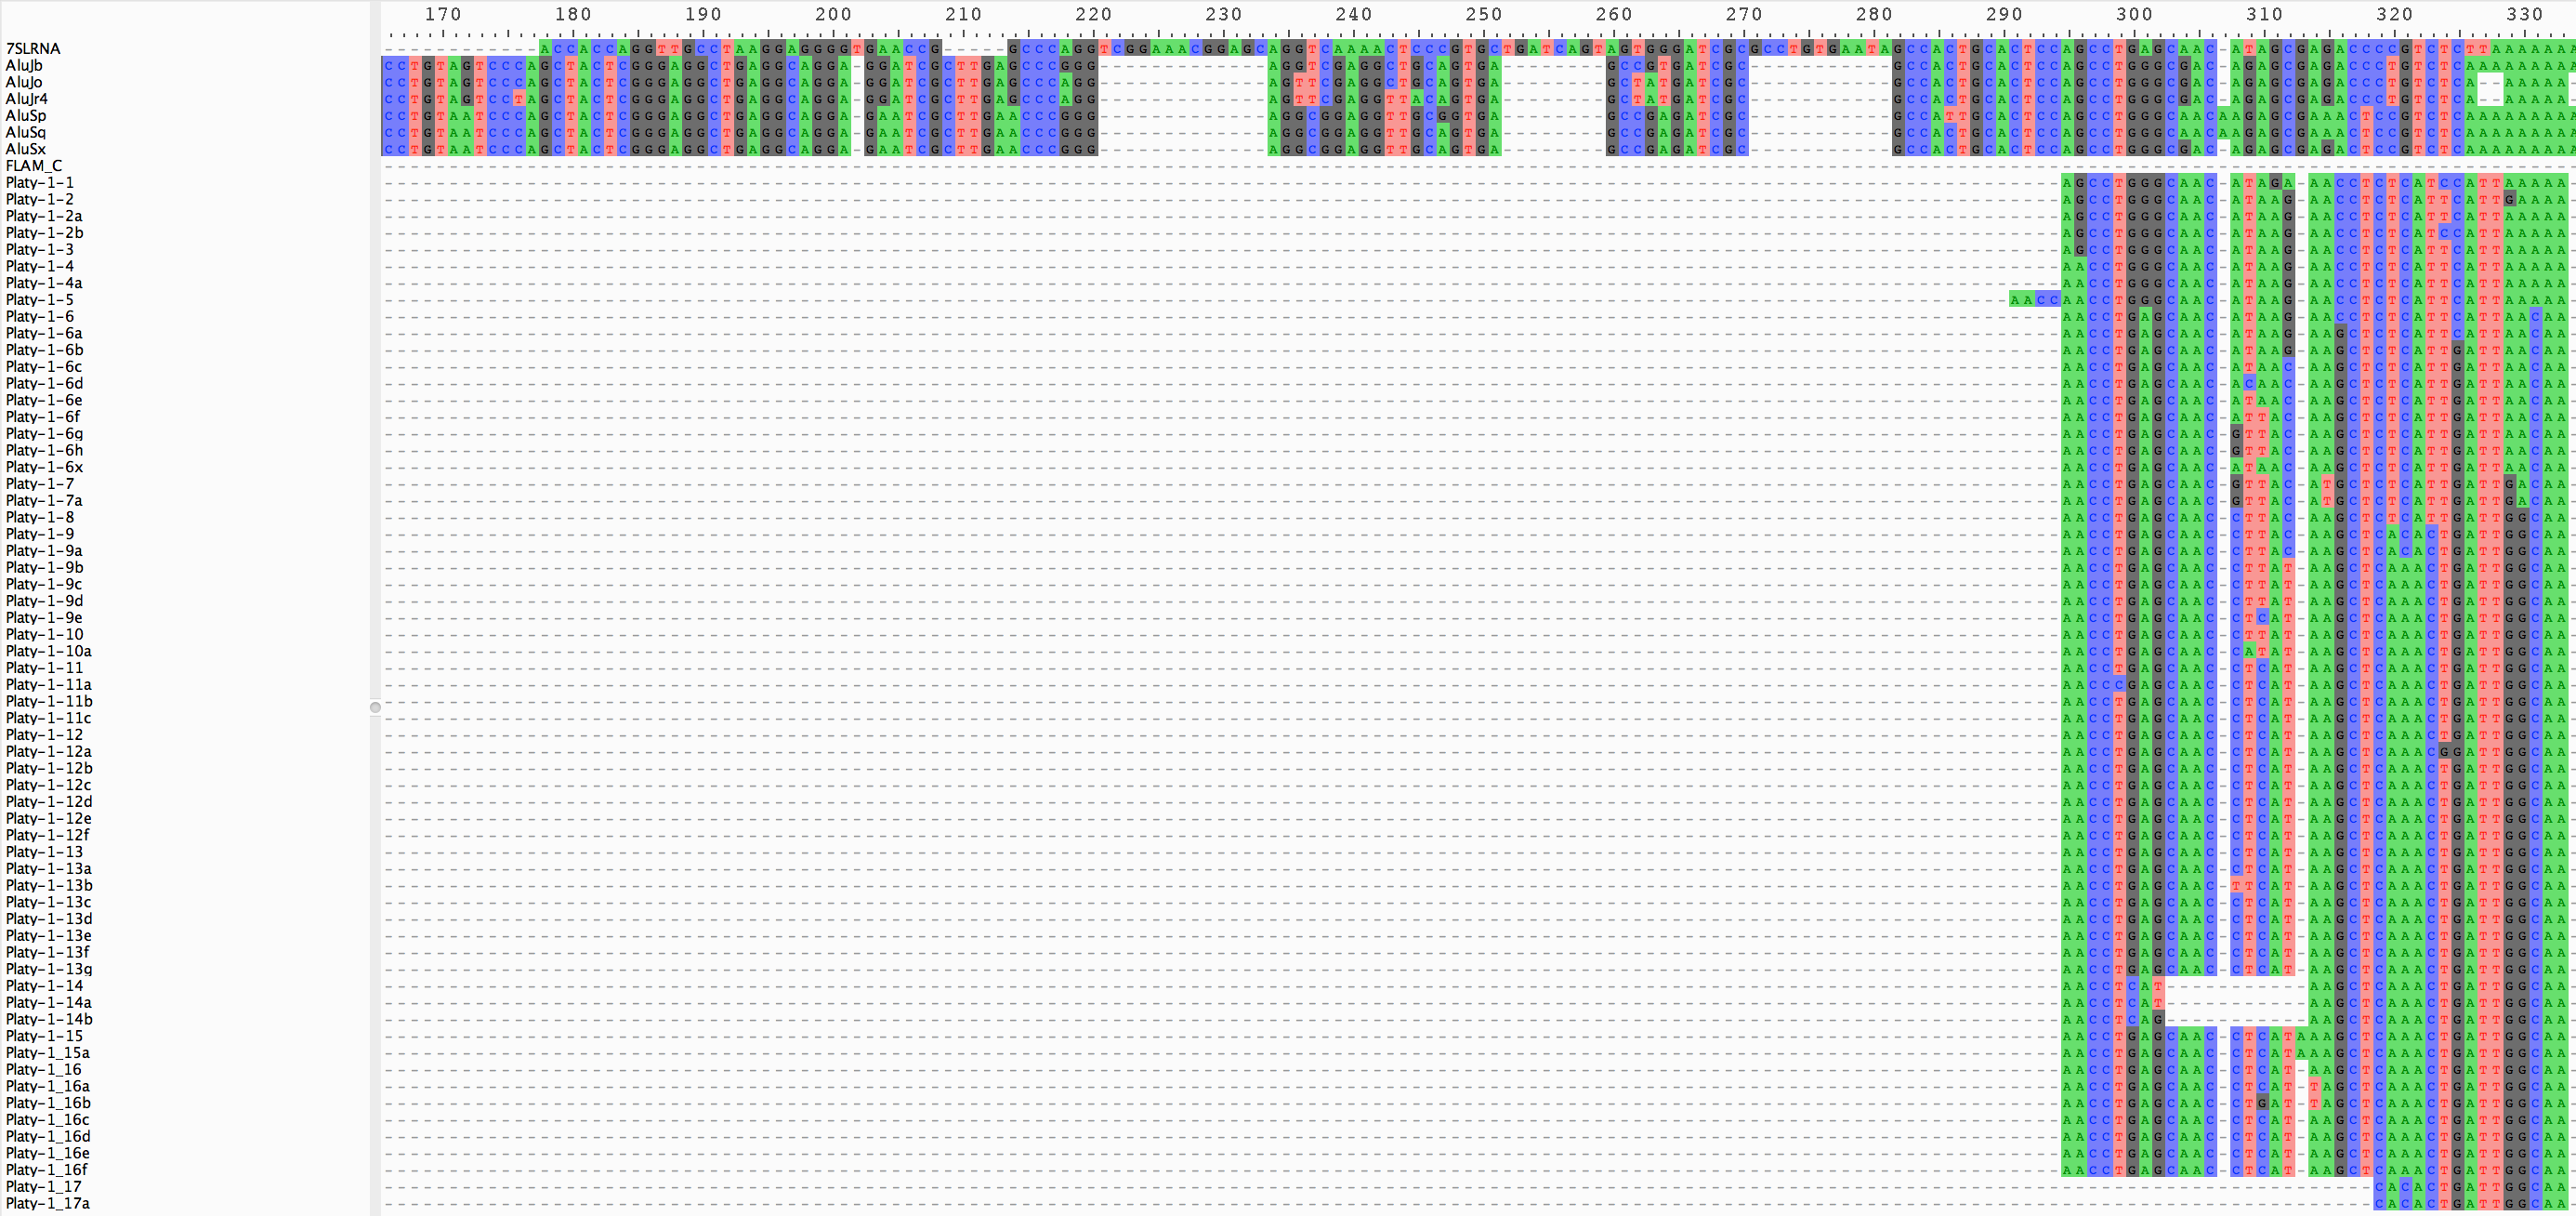


**Figure S5.** Platy-1 and *Alu* insertion at same chromosomal location. Shown is a sequence alignment of Platy-1 locus 157. The top four sequences are retrieved from the common marmoset, human, chimpanzee genome assemblies. The bottom four sequences are based on the Sanger sequencing results. The alignment shows that the Platy-1 insertion in common marmoset occurred at the same location as the truncated *Alu* insertion in Red Howler, Wolley, and Spider monkey. The amplicons containing the *Alu* insertion and the amplicon containing the Platy-1 insertion appear similar in size because the *Alu* insertion is severely truncated. The dark gray boxes show the TSDs of the Platy-1 and *Alu* insertion. (The alignment is also available in FASTA format from the Batzer Lab website (https://biosci-batzerlab.biology.lsu.edu/publications.html).)

**
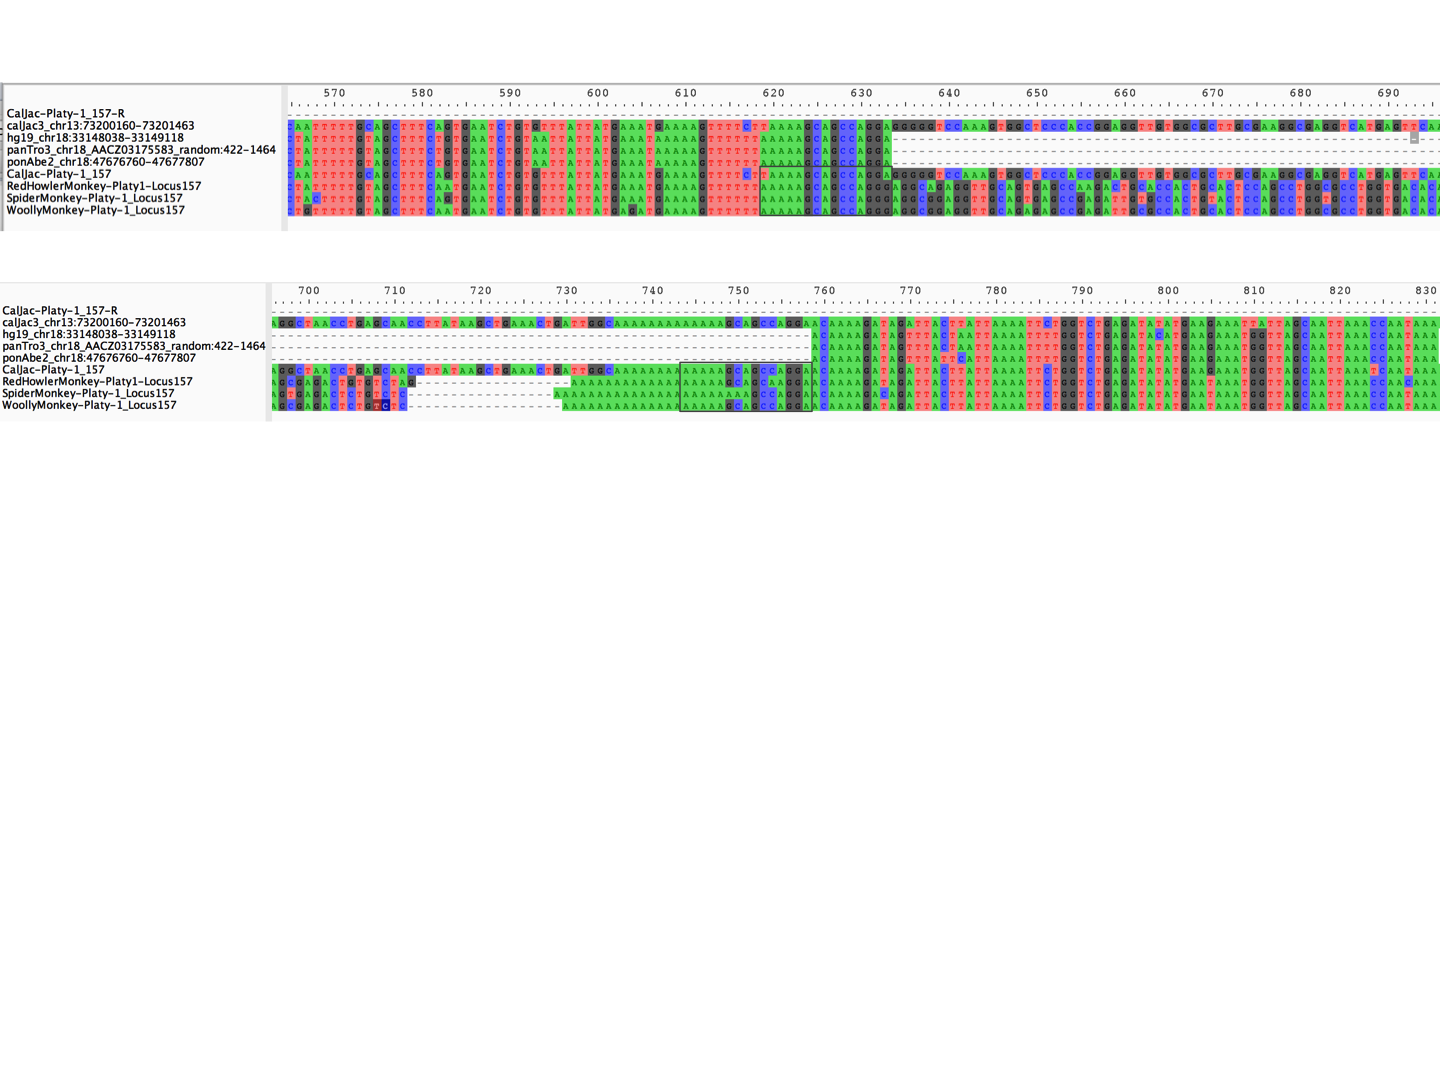
**

**Figure S6.** Alignment for construction of preliminary Platy-1 consensus sequence. Shown is an alignment of the ten most closely fitting Platy-1 loci. The sequence of the original Platy-1 element was queried against the common marmoset genome [calJac3.2] and the ten best hits were retrieved and aligned with each other. The alignment was visualized with AliView (Larsson 2014).

**
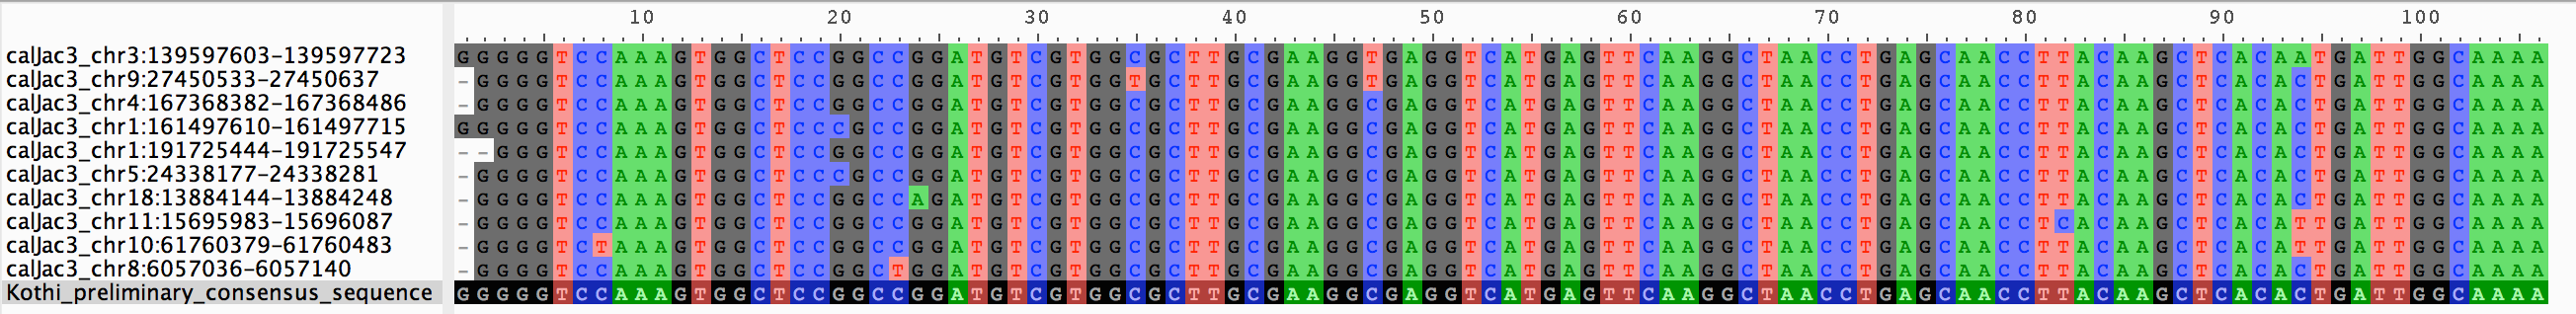
**

Abecasis GR, Altshuler D, Auton A, Brooks LD, Durbin RM, Gibbs RA, Hurles ME, McVean GA. 2010. A map of human genome variation from population-scale sequencing. *Nature* **467**: 1061-1073.

Bandelt HJ, Forster P, Rohl A. 1999. Median-joining networks for inferring intraspecific phylogenies. *Mol Biol Evol* **16**: 37-48.

Batzer MA, Deininger PL. 2002. Alu repeats and human genomic diversity. *Nat Rev Genet* **3**: 370-379.

Belancio VP, Hedges DJ, Deininger P. 2008. Mammalian non-LTR retrotransposons: for better or worse, in sickness and in health. *Genome Res* **18**: 343-358.

Bird AP. 1980. DNA methylation and the frequency of CpG in animal DNA. *Nucleic Acids Res* **8**: 1499-1504.

Chen JM, Ferec C, Cooper DN. 2007. Mechanism of Alu integration into the human genome. *Genomic Med* **1**: 9-17.

Cock PJ, Antao T, Chang JT, Chapman BA, Cox CJ, Dalke A, Friedberg I, Hamelryck T, Kauff F, Wilczynski B. 2009. Biopython: freely available Python tools for computational molecular biology and bioinformatics. *Bioinformatics* **25**: 1422-1423.

Cordaux R, Batzer M, Box P. 2009. The impact of retrotransposons on human genome evolution. *Nature Reviews Genetics* **10**: 691-703.

Cordaux R, Lee J, Dinoso L, Batzer MA. 2006. Recently integrated *Alu* retrotransposons are essentially neutral residents of the human genome. *Gene* **373**: 138-144.

Edgar RC. 2004. MUSCLE: a multiple sequence alignment method with reduced time and space complexity. *BMC Bioinformatics* **5**: 113.

Felsenstein J. 1989. PHYLIP -- Phylogeny Inference Package (Version 3.2). *Cladistics* **5**: 146-166.

Han K, Konkel MK, Xing J, Wang H, Lee J, Meyer TJ, Huang CT, Sandifer E, Hebert K, Barnes EW et al. 2007. Mobile DNA in Old World monkeys: a glimpse through the rhesus macaque genome. *Science* **316**: 238-240.

Han K, Xing J, Wang H, Hedges DJ, Garber RK, Cordaux R, Batzer MA. 2005. Under the genomic radar: The Stealth model of Alu amplification. *Genome Res* **15**: 655-664.

Kass DH, Batzer MA, Deininger PL. 1995. Gene conversion as a secondary mechanism of short interspersed element (SINE) evolution. *Mol Cell Biol* **15**: 19-25.

Kent WJ. 2002. BLAT--the BLAST-like alignment tool. *Genome Res* **12**: 656-664.

Kong A, Frigge ML, Masson G, Besenbacher S, Sulem P, Magnusson G, Gudjonsson SA, Sigurdsson A, Jonasdottir A, Jonasdottir A et al. 2012. Rate of de novo mutations and the importance of father's age to disease risk. *Nature* **488**: 471-475.

Konkel MK, Walker JA, Batzer MA. 2010. LINEs and SINEs of primate evolution. *Evol Anthropol* **19**: 236-249.

Larsson A. 2014. AliView: a fast and lightweight alignment viewer and editor for large data sets. *Bioinformatics* doi:10.1093/bioinformatics/btu531.

Librado P, Rozas J. 2009. DnaSP v5: a software for comprehensive analysis of DNA polymorphism data. *Bioinformatics* **25**: 1451-1452.

Nachman MW, Crowell SL. 2000. Estimate of the mutation rate per nucleotide in humans. *Genetics* **156**: 297-304.

Price AL, Eskin E, Pevzner PA. 2004. Whole-genome analysis of Alu repeat elements reveals complex evolutionary history. *Genome Res* **14**: 2245-2252.

Ray DA, Xing J, Salem AH, Batzer MA. 2006. SINEs of a nearly perfect character. *Syst Biol* **55**: 928-935.

Roy AM, Carroll ML, Nguyen SV, Salem AH, Oldridge M, Wilkie AO, Batzer MA, Deininger PL. 2000. Potential gene conversion and source genes for recently integrated Alu elements. *Genome Res* **10**: 1485-1495.

Sanger F, Nicklen S, Coulson AR. 1977. DNA sequencing with chain-terminating inhibitors. *Proc Natl Acad Sci U S A* **74**: 5463-5467.

Schiller BJ. 2013. Data Biology: A quantitative exploration of gene regulation and underlying mechanisms. UNIVERSITY OF CALIFORNIA, SAN FRANCISCO.

Smit A, Hubley, R & Green, P. . 2013-2015. RepeatMasker Open-4.0.

Smit A, Hubley, R. . 2008-2015. RepeatModeler Open-1.0.

Stewart C, Kural D, Stromberg MP, Walker JA, Konkel MK, Stutz AM, Urban AE, Grubert F, Lam HY, Lee WP et al. 2011. A comprehensive map of mobile element insertion polymorphisms in humans. *PLoS Genet* **7**: e1002236.

The Marmoset Genome Sequencing and Analysis Consortium. 2014. The common marmoset genome provides insight into primate biology and evolution. *Nat Genet* **46**: 850-857.

van de Lagemaat LN, Gagnier L, Medstrand P, Mager DL. 2005. Genomic deletions and precise removal of transposable elements mediated by short identical DNA segments in primates. *Genome Res* **15**: 1243-1249.

Wagstaff BJ, Hedges DJ, Derbes RS, Campos Sanchez R, Chiaromonte F, Makova KD, Roy-Engel AM. 2012. Rescuing Alu: recovery of new inserts shows LINE-1 preserves Alu activity through A-tail expansion. *PLoS Genet* **8**: e1002842.

Wu J, Lee WP, Ward A, Walker JA, Konkel MK, Batzer MA, Marth GT. 2014. Tangram: a comprehensive toolbox for mobile element insertion detection. *BMC Genomics* **15**: 795.

Xing J, Hedges DJ, Han K, Wang H, Cordaux R, Batzer MA. 2004. Alu element mutation spectra: molecular clocks and the effect of DNA methylation. *J Mol Biol* **344**: 675-682.

Zingler N, Willhoeft U, Brose H-P, Schoder V, Jahns T, Hanschmann K-MO, Morrish TA, Löwer J, Schumann GG. 2005. Analysis of 5' junctions of human LINE-1 and Alu retrotransposons suggests an alternative model for 5'-end attachment requiring microhomology-mediated end-joining. *Genome Res*

**15**: 780-789.
