# Supplementary material for: Discovery of a new repeat family in the Callithrix jacchus genome
Source: HighWire-hosted journal article supplement (doi:10.1101/gr.199075.115), 2016-02-25
Supplement: Supplemental_Tables_S1-S8.xlsx [file Supplemental_Tables_S1-S8.xlsx]

## Sheet: Suppl_Tables_S1A-S1B
Supplemental Table S1A. Phylogenetic Panel
Number	Species	Common name	Origin	ID
1	Homo sapiens	Human	ATCC	HeLa CCL-2
2	Pan troglodytes	Common Chimpanzee	IPBIR	NS06006
3	Chlorocebus aethiops	African green monkey	ATCC	CCL70
4	Alouatta sara	Bolivian red howler monkey	SDFZ	OR749
5	Ateles belzebuth	White bellied spider monkey	SDFZ	KB6701
6	Lagothrix lagotricha	Woolly monkey	Coriell	NG05356
7	Callithrix pygmea	Pygmy marmoset	SDFZ	OR690
8	Callithrix jacchus	Common marmoset	New England RPRC	cj 393-99
9	Cebus capucinus	Capuchin monkey	Dr. Jeffrey Rogers	CA003
10	Saguinus fuscicollis nigrifrons	Geoffroys saddle-back tamarin	SDFZ	OR621
11	Saimiri s. sciureus	Squirrel monkey	SDFZ	KB4544
12	Aotus trivirgatus	Owl monkey	ATCC	CRL1556
13	Callicebus d. donacophilus	Bolivian gray titi	SDFZ	OR1522
14	Pithecia p. pithecia	Northern white-faced saki	SDFZ	OR842
Supplemental Table S1B. Population Panel
Number	Specis	Common name	Origin	ID	ID in pop_analysis
1	Callithrix jacchus	Common marmoset	New England PRC	1-2008	Cm_1-2008
2	Callithrix jacchus	Common marmoset	Southwest NPRC	272	Cm_SW-272
3	Callithrix jacchus	Common marmoset	Wisconsin NPRC	CJ1590	Cm_CJ1590
4	Callithrix jacchus	Common marmoset	New England RPRC	cj 389-97	Cm_NE-1
5	Callithrix jacchus	Common marmoset	New England RPRC	cj 501-98	Cm_NE-2
6	Callithrix jacchus	Common marmoset	New England RPRC	cj 99-01	Cm_NE-3
7	Callithrix jacchus	Common marmoset	New England RPRC	cj 72-98	Cm_NE-4
8	Callithrix jacchus	Common marmoset	New England RPRC	cj 215-99	Cm_NE-5
9	Callithrix jacchus	Common marmoset	New England RPRC	cj 15-98	Cm_NE-6
10	Callithrix jacchus	Common marmoset	New England RPRC	cj 12-97	Cm_NE-7
11	Callithrix jacchus	Common marmoset	New England RPRC	cj 393-99	Cm_NE-8
12	Callithrix jacchus	Common marmoset	New England RPRC	cj 65-98	Cm_NE-9
13	Callithrix jacchus	Common marmoset	New England RPRC	cj 337-00	Cm_NE-10
14	Callithrix jacchus	Common marmoset	Southwest NPRC	17461	Cm_SW-17461
15	Callithrix jacchus	Common marmoset	Southwest NPRC	17953	Cm_SW-17953
16	Callithrix jacchus	Common marmoset	Southwest NPRC	19478	Cm_SW-19478
17	Callithrix jacchus	Common marmoset	Southwest NPRC	19570	Cm_SW-19570
18	Callithrix jacchus	Common marmoset	Southwest NPRC	25556	Cm_SW-25556
19	Callithrix jacchus	Common marmoset	Southwest NPRC	27537	Cm_SW-27537
20	Callithrix jacchus	Common marmoset	Southwest NPRC	27552	Cm_SW-27552
21	Callithrix jacchus	Common marmoset	Wisconsin NPRC	34040	Cm_34040
22	Callithrix jacchus	Common marmoset	Wisconsin NPRC	34044	Cm_34044
23	Callithrix jacchus	Common marmoset	Wisconsin NPRC	34042	Cm_34042
24	Callithrix jacchus	Common marmoset	Wisconsin NPRC	34043	Cm_34043

## Sheet: Suppl_Table_S2
Supplemental Table S2. Sequence analysis of Platy-1 elements on chromosomes 3, 10-13, 17
Locus	start	end	TSD (fill)	TSD length	Endonuclease site	polyA (fill)	As TSD	A-tail (w/o TSD As)	length A-tail (incl.A within TSD
chr10	25536149	25536211	AGAAGGT	7	TTCTGA	aaaaaaaaaaaaaagaa	A	17	18
chr10	75753305	75753408	insertion into A-rich region
chr10	86285623	86285697
chr10	24939847	24939947	GAATTC	6	ATTCAC	AAAAAAAA		8	8
chr10	45301062	45301154	AAAAATAc/tA	9	TTTTAT	a	AAAAA	1	6
chr10	84490650	84490753	Aa/tAAATAAG	9	TTTTAA	aaaaaataaataa	AAAAA	13	18
chr10	4606245	4606349	AAGGGAGTGG	10	CCTTAA	AAAAAAAA	AA	8	10
chr10	73432352	73432455	AGAAATTAAT	10	TTCTGT	aaaaaaaaaaaaaaaaaaaaaaaga	A	25	26
chr10	80051774	80051877	AAAACTTCTG	10	TTTTAA	aaaaaaataaaaataaaaaaaa	AAAA	22	26
chr10	100199392	100199477	AAAATCTCTT	10	TTTTCA	AAAAAAAAAAAAAAGAAAA	AAAA	19	23
chr10	117714519	117714613	AGGAATGCTG	10	TCCTGA	aaaaaaaaataaaaaataaaaa	A	22	23
chr10	123152350	123152452	GAAATCCTGC	10	TTTCAT	AAAAAAAAAAAAA		13	13
chr10	41516632	41516736	TCAATATTGTG	11	TTGAGT			0	0
chr10	49220343	49220446	AAAAGAg/aTCTA	11	TTTTCT	aaaaaaaaaaaaaaaaaaaaaaaaa	AAAA	25	29
chr10	59740281	59740384	GAAAAACGTCT	11	TTTCAA	AAAAAAAAAAAAAGAAA		17	17
chr10	110135014	110135108	AAGAAATt/cAGA	11	TCTTAT	aagaaaaa	AA	8	10
chr10	1943558	1943660	AAAAa/gTTTAAGT	12	TTTTAT	aaaaaaaaaaaaaaaaaaaaaaa	AAAAA	23	28
chr10	6723613	6723716	a/cAACAAAAAAGG	12	GTTTAT	AAAAAAAAAAAC	AAA	12	15
chr10	12988384	12988487	AAAAc/aCCCAGTC	12	TTTTAT	aaaaaaaaaaaaa	AAAAA	13	18
chr10	24606165	24606268	GATGAGGAATTG	12	CATCCT	aaaaaaaaaaaaaaaaaaaaa		21	21
chr10	59728758	59728851	AGAAAAATATAC	12	TTCTAT	aaaaaaaagaaaa	A	13	14
chr10	59756858	59756951	AGAAAAATATAC	12	TTCTAT	aaaaaaaaaaaaGAAAGAGAAA	A	22	23
chr10	74677509	74677612	AAGACTTCAATT	12	TCTTAA	AAAAAAAAAAAAAAA	AA	15	17
chr10	93105855	93105958	GAAATc/tCTTGTT	12	TTTCAA	aaaaaaaaaaaaaGAAA		17	17
chr10	2146726	2146819	AAAAAGAAGGTAA	13	TTTTAT	AAAAaaaaa	AAAAA	9	14
chr10	10742179	10742246	AGCACCTAATCCC	13	TGCTAA		A	0	1
chr10	27754205	27754307	AAGAACCCAAAAC	13	TCTTGA	aagaacccaaaac	AA	13	15
chr10	35259327	35259430	aagagatcgaggc	13	TCTTAA	aaaaaaaaaaaaa	AA	13	15
chr10	45311448	45311551	TAAAACAAAAATG	13	TTTAAA	AAAAAAAAAAAAAAGaaataaa		22	22
chr10	51754143	51754235	AAAt/aAt/aTTGTTGA	13	TTTTAA	aacaaaaacaaa	AAAAAA	12	18
chr10	55153422	55153515	AAAAAGTGAAAGA	13	TTTTAA	aaaaaag	AAAAA	7	12
chr10	61760380	61760483	GAAAGg/cCTATTTA	13	TTTCAT	AAAAAAAAAAAA		12	12
chr10	85707131	85707234	AAAAGAACTAAAT	13	TTTTAG	aaaaaaaaaaaaaaaaa	AAAA	17	21
chr10	92817489	92817581	Aa/cCg/aTATCATTTA	13	CGAATT	aacaacaacaaaaAAA	AA	16	18
chr10	106111639	106111742	GAAAGGGGAAATT	13	TTTCAT	AAAAAAAAAAAAAAA		15	15
chr10	120552457	120552558	ACATAGAt/aGGGGT	13	ATGTAT	A	A	1	2
chr10	129259905	129260004	AAAg/aAAAATTTAT	13	TTTTAT	AAAAAGAAAAA	AAA	11	14
chr10	7106214	7106307	AGAAAGTCAGGGGT	14	TTCTAT	AAAAAAAAAAA	A	11	12
chr10	8777209	8777311	AAATa/-AAACAAAAT	14	ATTT/TA	aaaaataaataaat	AAA	14	17
chr10	12042702	12042805	TAAAAGAGCTTCAA	14	TTTAAA	ACAAACAAACAAACAagatagatagatagatagatagatagatagatagatagatagatagatagataga		70	70
chr10	24173699	24173793	AAAAGCTATTTTAG	14	TTTTAA	aaaaaaaataaaataaaaaaa	AAAA	21	25
chr10	43359152	43359255	AAAAAATAAAAATT	14	TTTTGA	A	AAAAAA	1	7
chr10	49605675	49605778	AAGAGTTGTAATTT	14	TCTTAA	AAAA	AA	4	6
chr10	50770427	50770530	AAAAGt/aTTTTTGTC	14	TTTTAT	aaaaaaaaaaaaaaaaaaaaa	AAAA	21	25
chr10	55938830	55938924	AAATGGATATTCAC	14	ATTTAA	AAAAAAAAAAAAAAAAAA	AAA	18	21
chr10	62914820	62914923	AAAACTGTACTGTT	14	TTTTGA	AAAAAAAACAAAAAACAAACAA	AAAA	22	26
chr10	66850232	66850333	taaaAGGGTTTc/gCT	14	TTTAAC	Aaaataaataaataaataaataaataaaaataaaaaaa		38	38
chr10	77438292	77438390	AAAAa/gTTGTTTTAG	14	TTTTAT	AACAACa	AAAAA	7	12
chr10	83403846	83403949	AACTACAATAGTTT	14	AGTTAT	aaaaaataaaaaaataaaaaata	AA	23	25
chr10	91707954	91708057	AGAAGTCTAc/tAATT	14	TTCTAA	AAAAAAAAAAAA	A	12	13
chr10	96084716	96084806	AAAATATGTTTATA	14	TTTTAA	AACAACAAA	AAAA	9	13
chr10	98447162	98447255	ATATTTACTGAGTT	14	ATATTT	AAAAAAAAAAAAAAAAAatatatatatatatatatatatatatatat	A	47	48
chr10	103009596	103009699	AAAAAAAAAAGAAG	14	TTTTAT	AAAAAAAAA	AAAAAAAAAA	9	19
chr10	106980592	106980686	AAAAAAAAAAAAAA	14	TTTTAA	aaa	AAAAAAAAAAAAAA	3	17
chr10	124468179	124468281	Aa/tAAATAAACAACG	14	TTTTAT	aaaaataaataa	AAAAA	12	17
chr10	5480357	5480460	AAAGTATGAAATTGC	15	CTTTAT	AAAAAAAAAAAAAA	AAA	14	17
chr10	8257039	8257142	AAATGAGTTTACAAT	15	ATTTAA	AAAAAAAAAAAA	AAA	12	15
chr10	9988675	9988778	AGa/-AGGCAAGACAGT	15	TTCTAA	Aaaaaaaaagaaaaaaaaaaaa	A	22	23
chr10	20021956	20022048	CAAa/cAACAAAAGTTC	15	TTTGAG	AA		2	2
chr10	51312172	51312276	GAAAATa/gTAAGTCa/gT	15	TTTCAA	aaaaaaaaaaaaaaaaaaaaaaaaaaaaaagaaagaaaaaaaa		43	43
chr10	62194950	62195054	AAa/gAAGAAGACCAt/cA	15	TTTTAT	AAAAAAAAAAAAAAAAA	AAAAA	17	22
chr10	68619117	68619220	aaagaggc/tactacac	15	CTTTCA	aaaaaaa	AAA	7	10
chr10	69861267	69861370	AAAAATAGAATTTTA	15	TTTTAT	aaaaaaaaaaaa	AAAAA	12	17
chr10	90679310	90679413	AAAAg/aTTAAATTCTC	15	TTTTAA	aaaataaataaataaaag	AAAA	18	22
chr10	92545507	92545559	Ag/aATCATGTg/aGa/cATA	15	ATTTAA		AAA	0	3
chr10	107086246	107086349	AAAGTACCCAt/aTt/aGG	15	CTTTCT	AAATAAATAAATAA	AAA	14	17
chr10	127632376	127632479	Ag/aGAAAGCTCATTTT	15	TCTTAA	AAAAAAAAAAAAAATAATA	AA	19	21
chr10	4376525	4376628	TAAAATGGCGGGATCA	16	TTTAAT	aaaaaaaataaa		12	12
chr10	6829154	6829256	AAAAGAAg/cTCCAACAC	16	TTTTGG	AAAAAAAA	AAAA	8	12
chr10	14390069	14390160	AAAAAAGCTAAAAATA	16	TTTTAT	aaaaaaaaaaaaaaaaaaaaaaaaTTCTGTGttacc	AAAAAA	36	42
chr10	20409946	20410040	AAAGAAAAATCACCAG	16	CTTTAG	AAAAAAAAA	AAA	9	12
chr10	23511996	23512064	Aa/gAATTCCAAa/gAATGG	16	TTTTAA	AAAAAAAAAAAAAAAAA	AAAA	17	21
chr10	25541208	25541276	AAAAAAGAAATTTCTG	16	TTTT/CT	aaaaaaaa	AAAAAA	8	14
chr10	46271291	46271394	AGAAAAAGTATTGCCT	16	TTCTAA	aaaaaaaaaaaaaaaaaa	A	18	19
chr10	48020073	48020167	AAGATAAGCAGTCCTC	16	TCTTGA	AAAAAAAAAAAAAA	AA	14	16
chr10	50553887	50553990	AAAGTTAACAGTAATT	16	CTTTAA	aaaaaaaaaaaaaaaaa	AAA	17	20
chr10	52729526	52729629	AAATTTAATCAGGTTC	16	ATTTAA	AAAAAACAAAACAAAACAAAAA	AAA	22	25
chr10	53591232	53591335	a/gAAa/gAGAGAGATGGCA	16	TTTTAA	AAAAAAAAAA	AAAAA	10	15
chr10	80040457	80040560	AAAg/aAGTGACACAGTT	16	TTTTAC	aaaaaaaaaaaaaaa	AAAAA	15	20
chr10	86761726	86761829	AAAt/aAGTCATATCATA	16	TTTTAT	aaaaaaaa	AAAA	8	12
chr10	88684186	88684288	TAAAAACAATAAAGTC	16	TTTAAG	AAAAAATAAATAAAAAAAAA		20	20
chr10	93037787	93037889	TAAACAg/aTTGCc/gGGt/aC	16	TTTAAA	AAAATAAATAAATAAA		16	16
chr10	98892598	98892701	AAAAGAAGTTGAAAGA	16	TTTTAT	AAAAAAAAAAA	AAAA	11	15
chr10	100842639	100842743	ATAATAATAGCTTACC	16	TTATCC	AAaaaataataata	A	14	15
chr10	110453901	110454004	AAAAATCAAAg/tGTATA	16	TTTTAC	AAAAAAAAAAAA	AAAAA	12	17
chr10	3800765	3800868	AAGAAAAATTt/cTGACTT	17	TCTTCC	aaaaaaaaa	AA	9	11
chr10	17824597	17824674	AAg/aAATCACCAAt/cg/aGTA	17	TCTTAA	aaaaaaaa	AAAAA	8	13
chr10	18173578	18173681	AGAAACTGTGCTGGACA	17	TTCTAC	AAAAAAAAAAGAAAGAAA	A	18	19
chr10	48163689	48163792	AAATACTTTTGTATTGG	17	ATTTGA	AACAACAACAAAA	AAA	13	16
chr10	67889683	67889777	AGAAATTAGACTAc/gTAC	17	TTCTAT	AAAAAAAAAAACAAAAAAAGAAA	A	23	24
chr10	105672442	105672544	AAAAAGAACAGAAAATA	17	TTTTAG	AAAAAA	AAAA	6	10
chr10	108811296	108811400	AAAATTCAACAGTAAGA	17	TTTTAA	AAAAAAAAAAAAAAA	AAAA	15	19
chr10	117746041	117746134	GAAATAATGg/aCAGGGTT	17	TTTCAC	aaaaaaaaaaaaaaaaAgaaa		21	21
chr10	43496270	43496373	AGAAAATAACATCCAGCT	18	TTCTAA	AAAAAAAAAGAAAA	A	14	15
chr10	85063920	85063990	AAATTCATGGAAATCCTG	18	ATTTAA	AAAAAAA	AAA	7	10
chr10	113450757	113450860	AAAAA(TGTT)TAGTCAA	18	TTTTAA	AAAAA	AAAAA	5	10
chr10	15218868	15218960	TGCCAGAAATGAAGAATCC	19	GGCATT			0	0
chr10	20171077	20171180	a/-a/-AAAAAAAAAAAAATCTC	19	TTTTAA		AAAAAAAAAAAAAAA	0	15
chr10	62854181	62854284	AAAAAAATTCCCCTTCCCT	19	TTTTAA	aaaaaaaaaaaa	AAAAAAA	12	19
chr10	111697910	111698011	AGAAAAAATGACTCAATCT	19	TTCTAA	aaaaaaaaaaaGAAAA	A	16	17
chr10	113356500	113356584	a/-a/-a/-AAAAAAAACAAAACTTG	20	TTTTAA		AAAAAAAA	0	8
chr10	123535195	123535288	AGa/gGAGA-/t-/cTCATTACTTCc/t	20	CTCTAA	AAAAAAAAAAA	A	11	12
chr10	17508920	17509022	AAAAAAAAAAAAAAAAAAAAAGA	23	TTTTAA	aaa	AAAAAAAAAAAAAAAAAAAAA	3	24
chr11	26252620	26252724	insertion into A-rich region	0
chr11	12971213	12971299		0
chr11	7528026	7528117		0
chr11	7530542	7530633		0
chr11	1587947	1588040	AAGACTTT	8	TCTTGA	AACAACAAAA	AA	10	12
chr11	6284207	6284310	AAAAATACA	9	TTTTAG	aaaaaaaaaaaaaaaattaaaaaaaaaaaGAG	AAAAA	32	37
chr11	16341082	16341149	AATAAAATT	9	TATTAC	AAAAAA	AA	6	8
chr11	10098066	10098169	AAt/gAAATTCA	10	TCTTAT	aaaaaaaaaaaaaaagaaaa	AA	20	22
chr11	9371209	9371294	AAGAATAGTGA	11	TCTTAT	aaaaaaaaaaaaaaaaa	AA	17	19
chr11	191573	191676	AGGAAGAAACAA	12	TCCTAA	aaaaaaaaaaaaaA	A	14	15
chr11	2980217	2980320	Ga/gAAAAACAg/tAG	12	TTTCAA	AAA		3	3
chr11	5834471	5834574	Aa/gAAt/aCTTAGCTTT	14	TTTTAT	aaaaaaaaaaaaG	AAAAA	13	18
chr11	30088002	30088100	AAGAGGAAAAGAAG	14	TCTTAA	aaaaaaaaaaaaaaaaaaaaa	AA	21	23
chr11	5296446	5296548	TAAAGGTTGGTAGCA	15	TTTAAA	AATAAATAAATAAA		14	14
chr11	19935773	19935875	AGAATTTCTTAAAGT	15	TTCTAA	AACAACAAAAA	A	11	12
chr11	26025036	26025128	AAAAAAAa/tTAGAAGA	15	TCTAAT	aaaaaaagaa	AAAAAAA	10	17
chr11	28165096	28165199	AAGAGACCAGAATAT	15	TCTTAA	aaaaaaaaaaaaaaaaaa	AA	18	20
chr11	5695459	5695553	GAAACTTACTTTTTTT	16	TTTCAA	aaaaaaaaaaaaGAA		15	15
chr11	7167352	7167455	AAAATTACTCAGTAAAT	17	TTTTAT	AAAAAAAAAAA	AAAA	11	15
chr11	7884651	7884754	AAGAAAACTAGAGG-/cTA	17	TCTTAA	aaaaaaaaaaaa	AA	12	14
chr11	9725339	9725442	AAATAAAg/-CTc/gAAATGG	17	ATTTCT	AAAATAAAT	AAA	9	12
chr11	15695984	15696087	AGAGAAATCTGAGACt/cT	17	CTCTAC	AAAAAAAAAAAAAAAAAAGAGAG	A	23	24
chr11	19856662	19856764	AAACAAAGACAACAGTT	17	GTTTAT	AAAAACAACAACAACAAAA	AAA	19	22
chr11	20296805	20296890	TGAGTTACc/tACACCCAG	17	CTCACG			0	0
chr11	8658525	8658626	AAAAAAAAAAAAAATTCA	18	TTTTAA		AAAAAAAAAAAAAA	0	14
chr11	11928827	11928921	insertion into polA	19		?		1	1
chr11	5309716	5309819	AAAAGAAAAGAAACATCATA	20	TTTTCC	AAAAAAAAAA	AAAA	10	14
chr12	21694011-21694113			0
chr12	97997553-97997655			0
chr12	36481029-36481129			0
chr12	69876362-69876461			0
chr12	37552633-37552734			0
chr12	112351874-112351976			0
chr12	173374-173476			0
chr12	28646197-28646289			0
chr12	28231581-28231682			0
chr12	27458842-27458944			0
chr12	4447004-4447107			0
chr12	55772796-55772898			0
chr12	93326749-93326851			0
chr12	79381813-79381896		AACAGTGAAAT	11	TGTTAA	AAAAAATAAAAAATAAAAAA	AA	20	22
chr12	68834966-68835068		Ag/aAACTCTCTA	11	TTTTAA	AAAAAAAAAAAAAAAAAAAAA	AAAA	21	25
chr12	13855293-13855394		AGAAAAGAATCA	12	TTCTAA	AAAAAAAAAAAGAAAGAA	A	18	19
chr12	57548602-57548704		AAGATAGAGTGt/gT	13	TCTTGA	AAAAAAAAAAAAAAAAAA	AA	18	20
chr12	8489243-8489335		AAGAATTATTTAT	13	TCTTAT	AAAAAAAAAA	AA	10	12
chr12	25518437-25518539		AAAACCTTGGGTA	13	TTTTAT	AAAAAAAAAAAAAAAAAAAAA	AAAA	21	25
chr12	13954152-13954232		GAAAATTACCTTT	13	TTTCAA	ACAAAATAAAAAAA		14	14
chr12	71822366-71822468		GAAACACCATTACT	14	TTTCAA	AAAAAAAAAAA		11	11
chr12	91416871-91416961		GAAAGAAAAATGGT	14	TTTCCT	AAAAAAAAAAAAA		13	13
chr12	106091167-106091269		AAGAACCCAGGTTA	14	TCTTAA	AAAAAAAAAAAAAAAAAAAA	AA	20	22
chr12	43813752-43813854		AAAAAc/aATCTTCCT	14	TTTTAC	AAAAAAAAAAAA	AAAAAAA	12	19
chr12	8826779-8826881		AAc/aAATCCTTCTGA	14	TTTTGA	AAAAAA	AAAAA	6	11
chr12	70216030-70216132		AATAAATAAGGTt/gT	14	TATTAT	AAAAATAAATAAATA	AA	15	17
chr12	11955289-11955392		AGAGGCATGAGCCG	14	CTCTAA	AAAAAAAAAAAA	A	12	13
chr12	94811181-94811283		AAAAc/aACCACCATC	14	TTTTGA	aaaaaaaaaaaaaaa	AAAAAA	15	21
chr12	106299541-106299643		AGAAGGTATGGCAG	14	TTCTAT	aaaaaaaaaaaaaaaaaaaa	A	20	21
chr12	19565402-19565503		AAAACACTAAATCA	14	TTTTAT	AAAAAAACAAAAACAAAAACAAAAACAAA	AAAA	29	33
chr12	22377950-22378052		AGAACAAGACTGTT	14	TTCTGT	AAAAAAAAAAAAAAAAAA	A	18	19
chr12	83729592-83729694		AATAACTc/gGGCTGGG	15	TATTAA	AAAAATAAAATAAAATAA	AA	18	20
chr12	73639485-73639587		AAAAACAGGAGTTGT	15	TTTTAC	AAAAAAAAAAAA	AAAAA	12	17
chr12	73688444-73688546		AGAAAAAGTAATCTT	15	TTCTAT	AAAAAA	A	6	7
chr12	113845125-113845225		AACAATTATCAAAAC	15	TGTTAA	AAAAAAAAAAAAAAAAAAAAAAAAA	AA	25	27
chr12	51218489-51218590		AAAAACTTAACTACT	15	TTTTGA	AGAAAAAAAAA	AAAAA	11	16
chr12	3134654-3134756		Aaa/cAAAAAATTTAGG	15	TTTTAA	Aacaac	AA	6	8
chr12	120038987-120039087		AAAGAGCCa/gGAAGTG	15	CTTTGT	AGAAAAAAAAAA	AAA	12	15
chr12	22035325-22035418		TAAAAAAAAAGAGAG	15	TTTAAA	aaaaaaaaaataataaaaaaataaaaataaaaaa		34	34
chr12	49800071-49800173		AAg/aACTTTt/cAAGTc/tG	15	TTTTAT	AAAAAAAA	AAAA	8	12
chr12	80982207-80982307		AAAAAAAg/aGAAATTTT	16	TTTTAA	AAA	AAAAAAAA	3	11
chr12	37277792-37277893		AAAAATg/tAAAACAGCA	16	TTTTAT	AAAAAAAAAA	AAAAA	10	15
chr12	101613099-101613179		Aa/cGg/aAACTCAGCTTGA	16	TCTTAG	AAAAAAAAAAAAA	AA	13	15
chr12	58206845-58206947		AAAAAt/aATCCGTCATC	16	TTTTAT	AAAAAAAAAAAA	AAAAAAA	12	19
chr12	98426114-98426216		AAGAAACAGAATTCTC	16	TCTTAA	AAAAAAAAAAAAAAA	AA	15	17
chr12	76169424-76169526		AAGAACTc/tGCTTTATG	16	TCTTAA	AAAAAAAAAAAAAA	AA	14	16
chr12	22867940-22868042		AGAAGAAGTAGTTa/gTA	16	TTCTAC	aaaaaaaaaaaaaaaaaaaaaaaaaaaaga	A	30	31
chr12	107876301-107876403		AAAGAAAGTAACCCAT	16	CTTTAT	AAAAAAAAA	AAA	9	12
chr12	3903852-3903952		AAAGAAATTGATTTTT	16	CTTTAA	AAAAAAAAAAAAAAAAAAAAAAAA	AAA	24	27
chr12	19590168-19590270		AAGAAAATGGACACTTG	17	TCTTGT	AAAAAAAAAAAAAAAAAAAAAAA	AA	23	25
chr12	40482032-40482129		AAAAGGTGCTTATTTTA	17	TTTTAC	AAAAAAAAAAA	AAAA	11	15
chr12	66367474-66367575		AAAAAt/aAAGTCCAGAAA	17	TTTTAT	AA	AAAAAAAA	2	10
chr12	114374631-114374733		GAAATATTTAAAAAGTC	17	TTTCCA	AAAAAAAAAAAAAAAAAAAAAAAA		24	24
chr12	3482258-3482360		GAAAAAGGATGTGGAGC	17	TTTCAT	AAAAAAAAGAAAAA		14	14
chr12	104995536-104995638		AGAAAAAGACAGAACTG	17	TTCTAG	AAAAAAA	A	7	8
chr12	81499548-81499649		AAAATATGCTGAAGTCG	17	TTTTAT	ACACAAAAAA	AAAA	10	14
chr12	51422873-51422975		AAAAAATGAATTATTCTG	18	TTTTAA	AAAAAAAA	AAAAAAA	8	15
chr12	33246483-33246585		GAAAAGGAGATAAAAGTT	18	TTTCAT	AACAAAAAAAAAAAA	GAAAA	15	20
chr12	94946985-94947085		AAGAGAATATTGAAAATC	18	TCTTAT	AAAAAAAAAAAAAAAAAAAAA	AA	21	23
chr12	2245105-2245207		AAAAAAAAAAAAAAAATT	18	TTTTAA	AAA	AAAAAAAAAAAAAAAA	3	19
chr12	110300261-110300363		AAAAAAAAACAAGGAGg/cA	18	TTTTAA	AAAAA	AAAAAAAAACAA	5	17
chr12	73596730-73596832		Ca/t/-/t-/tTTTTTAAGAATTTTTT	19	AATGAA	AAAAAAAAAAGA		12	12
chr12	78032306-78032407		GAAAATATTAATGTGCTCA	19	TTTCAT	AAAAAAAAATGTAAAAAA		18	18
chr12	58479613-58479714		AAAAAAATATTAAAGGAAC	19	TTTTCA	AACAAAAACAAAAAACAAAACA	AAAAAAA	22	29
chr12	62203664-62203756		AAAAAAAAAGGACAAATGT	19	TTTTAG	AAAAAAAAA	AAAAAAAAA	9	18
chr12	56187801-56187903		Gc/aAAGAAAGATTTATTCAT	19	CTTTCA	aaaaaaaaaa		10	10
chr12	60979295-60979397		AGAAATATTTACTGAATGA	19	TTCTAA	AAAAAAAAAAAAAAAAA	A	17	18
chr12	39774657-39774758		AAAc/aAGAAATTCTCTATTTA	20	TTTTAA		AAAAA	0	5
chr12	113808494-113808594		ACTTATTTTATAGTTAATTTTG	22	AAGTAA
chr13	79825529-79825631			0
chr13	28507261-28507340			0
chr13	83969293-83969393			0
chr13	45880586-45880688			0
chr13	7301254-7301356			0
chr13	42528145-42528246			0
chr13	57210423-57210523			0
chr13	64169173-64169268			0
chr13	4539062-4539161		TCAAGAC	7	TTGAAA	aaaaaaaaaaaaaaaaaaaaaaaaaaaatttaattttaaaaaaaattaaaaaaagaaagaa		61	61
chr13	48990603-48990704		AGACCTTGC	9	GTCTAT	AAAAAAA	A	7	8
chr13	47349581-47349681		ATGGACAGA	9	CCATTT	ACAGAGACAGACAGACAG	A	18	19
chr13	105721892-105721994		TGATGTATG	9	ATCAAT	AAAAAAAGAAAAAAAAAA		18	18
chr13	44253745-44253845		GAAAAGCTt/aG	10	TTTCAT	AAAAAAAAAAAAAAAAAAAAAAAAAA		26	26
chr13	13070769-13070871		TAAACAGGAG	10	TTTAAA	AAAAAAAAGAAAAAAAA		17	17
chr13	86238499-86238601		AAAg/aAATACT	10	TTTTAA	AAAAAAAAAAAAAA	AAAAAA	14	20
chr13	79436577-79436678		AAAGATTTTTT	11	CTTTAA	AAAAAA	AAA	6	9
chr13	57546377-57546476		TATGt/cTACTCTC	12	CATATG	AAAAAAAAAAAAAT		14	14
chr13	111360657-111360760		AAAAAATGGGCC	12	TTTTAA	AAAAAAAAAAAAAA	AAAAAA	14	20
chr13	7293168-7293265		AACAACAGAACA	12	TGTTAA	AAAAAAAAAAAAAAATTACAAAAAACAAAA	AA	30	32
chr13	80952088-80952181		AAAAg/aAAGTTTT	12	TTTTAA	AAAAAAAAAAAAAAAAAAAA	AAAAAAA	20	27
chr13	19143279-19143381		AAAAAt/aACAGg/aTA	13	TTTTAT	AAAAAAAAAAAA	AAAAAAA	12	19
chr13	115003258-115003360		AAGATATTTT-/tGG	13	TCTTGT	AAAAAAAAAAA	AA	11	13
chr13	94756380-94756482		AAAATCAAAGCTT	13	TTTTCA	aaaaaaaA	AAAA	8	12
chr13	30095422-30095522		AAAAGTTAATGAA	13	TTTTAA	AAAAAAAAAAAAAAAAAAAAA	AAAA	21	25
chr13	8227344-8227446		AAACCTGCTTGTG	13	GTTTAA	AAAAAAAA	AAA	8	11
chr13	70042414-70042515		AAACATGAAATTC	13	GTTTCA	AAAAAAAAAAAAAAAAA	AAAA	17	21
chr13	28047069-28047171		AGAAGTTATCTGA	13	TTCTAA	AAAAAAAAAA	A	10	11
chr13	78124629-78124731		AACACTCTCTGGG	13	TGTTAA	AAAAAAAAAACCAAAACAAAACAAAACAAAAAA	AA	33	35
chr13	68899-69001		AACAATGAGTTAT	13	TGTTAA	AAAAAAAAAAAA	AA	12	14
chr13	7230192-7230294		AAAAAGTCACATTA	14	TTTTAA	AAAAAAAAAAAA	AAAAA	12	17
chr13	107314888-107314981		AAAAGCCTTAATCT	14	TTTTAT	AAAAAAAA	AAAA	8	12
chr13	76141230-76141333		AAAAGAATTATTGG	14	TTTTGA	AAAAAAAAAAAAAAAAAAAAAAAAA	AAAA	25	29
chr13	73200760-73200862		AAAAGCAGCCAGGA	14	TTTTAA	AAAAAAAAA	AAAA	9	13
chr13	32869430-32869530		AAa/gAGAGAAGAATG	14	TTTTGG	AAAAAAAAAAAAAAA	AA	15	17
chr13	22079564-22079657		AAAAATCTAATTTT	14	TTTTAA	AAAAAAAAAAAAA	AAAAA	13	18
chr13	21652009-21652111		TAAAAAt/gATATTTA	14	TTTAAA	AAAAAAAATAAAAATAAAAA		20	20
chr13	83847978-83848078		AAAAACCAACATACT	15	TTTTAA	aaaaaaaaaaac	AAAAA	12	17
chr13	55229204-55229306		a/-a/-a/-AAAAAATTTAGG	15	TTTTAT		AAAAAA	0	6
chr13	93252090-93252183		AAGAAAAGCAGTTAG	15	TCTTAA	AAAAAAAAAAAAAAAAAA	AA	18	20
chr13	25420683-25420786		AAAAACAAATATTAG	15	TTTTAA	AAAAAAAAAAAAAAACAAACA	AAAAA	21	26
chr13	90063493-90063595		AAAAGGAAAa/tTGt/gTT	15	TTTTAT	AAAAAAAAAAAAGAA	AAAA	15	19
chr13	109142272-109142374		AAATGTATTACAACA	15	ATTTAT	AAAAAAAAA	AAA	9	12
chr13	64309746-64309791		AAAAa/gGTTAAAAGTT	15	TTTTAA	AAAAAAAAAAAAAAAAAAAAAAAAA	AAAA	25	29
chr13	21320367-21320461		AAAACAAAGCAAACA	15	TTTTAA	AAAAAC	AAAA	6	10
chr13	109326391-109326484		AAAAATACAGTTTAG	15	TTTTAA	AAAAAAAAAAA	AAAAA	11	16
chr13	111390955-111391057		AAGAg/aTTGg/cTTATGT	15	TCTTAA	AAAAAAAAAAAAAAAAA	AA	17	19
chr13	80039715-80039816		AAg/aAAt/-a/-c/-c/-AAAATC	15	TCTTAA	AAAA	AAAAA	4	9
chr13	114721539-114721641		AAGATGGCGGTGTTT	15	TCTTAA	AAAAAAAA	AA	8	10
chr13	57682602-57682704		Aag/aAAAt/gTATAAGTA	15	TTTTAT	AAAAAAAAAAAAAAAAAAAAG	AA	21	23
chr13	60623826-60623928		AAAATCCATTCTCAG	15	TTTTAA	AAAAAAAAAAAAAAAAA	AAAA	17	21
chr13	28015340-28015442		AAAAATACAAAAAAT	15	TTTTAG	AAAAAAAAAAAAAAA	AAAAA	15	20
chr13	37106885-37106987		AAGAAAACGGCTGGG	15	TCTTGA	AAAAAAAAAAAAAAAAAAAG	AA	20	22
chr13	32196884-32196986		GAAAAGATTATTTGG	15	TTTCAA	AAAAAAAAAAAAAGAAAAGAAAA		23	23
chr13	74855924-74856015		AAAGAAATGAACAAGT	16	CTTTAA	AAAAAAAAAAAAAGAAA	AAA	17	20
chr13	9540607-9540709		AAGAATGGGATAATCA	16	TCTTGC	AAAAAAAAAAAAAAAAAAAAAA	AA	22	24
chr13	48973539-48973641		Ag/aAAATACACAATGAG	16	TTTTAA	AAAAAAA	AAAAA	7	12
chr13	96934852-96934952		a/gAGAGAAGTTTATTTT	16	TCTTAA	AAAAAAAAAAAAGA		14	14
chr13	47418585-47418687		AAAAAa/tCTTATTACAG	16	TTTTAA	AAAAAAAAAAAAAAAAAAAA	AAAAA	20	25
chr13	66812037-66812139		AGAACAAATGAAGATG	16	TTCTAT	AAAAAAAAAAAAAAAAA	A	17	18
chr13	109902844-109902944		a/gAGAGAAGTTTATTTT	16	TCTTAA	AAAAAGATAAAAGA		14	14
chr13	23938760-23938862		AAGAGTCCTTTATTGG	16	TCTTAA	AAAAAAAAAAA	AA	11	13
chr13	78235010-78235098		AGAAa/tGTTTGGCAATAG	17	TTCTAC	AAAAAAAAAA	A	10	11
chr13	100682460-100682562		AAAAATTAGCATCTCa/tC	17	TTTTGA	AAAAAAAAAAAAAAAA	AAAAA	16	21
chr13	63403607-63403709		AAGAATCTCACTGGAAT	17	TCTTAA	AAAAAAAAAAAAAAA	AA	15	17
chr13	33243014-33243111		CAAAATCTCTTGAAGTG	17	TTTGAT	AACAACAACAACAACAACAACAA		23	23
chr13	32856778-32856880		AAAAGAATTAAGGCCTT	17	TTTTGA	AAAA	AAAA	4	8
chr13	9072453-9072555		AGAAAATGGCCTTTGTG	17	TTCTAA	AACAACAACAACAACACACACACACAAAAAAAGAA	A	35	36
chr13	2817363-2817465		AAGa/ga/gGGGGAAGTTg/aGG	17	TCTTAT	AAAAAAAAAAAAAAAA	AA	16	18
chr13	36892055-36892157		AAGAATGATCTTTCTCC	17	TCTTAT	AAA	AA	3	5
chr13	62235728-62235830		Aa/tAa/tATATTCCACAAGCA	18	TTTTAA	AATATATA	A	8	9
chr13	26295972-26296073		AAGAAAAACAGCTTTTTC	18	TCTTAT	AAAAAAA	AA	7	9
chr13	57144377-57144479		AGAAAAAGATCAAGAGt/cT	18	TTCTTT	AAAAAAAAAAAAAGAAAA	A	18	19
chr13	80088011-80088104		AGAAATATATTc/tCTCCTG	18	TTCTAA	AAAAAAAAAAAAAAAA	A	16	17
chr13	46920282-46920384		Ac/aAAATTGTATAa/-t/-AAGC	18	TTTTAT	AAAAAAAA	AAAAA	8	13
chr13	106272590-106272693		AAAACATGGAGTTt/cTGGTG	19	TTTTAT	AAAAAAAAAAAACAAAAAAAAA	AAAA	22	26
chr13	14745855-14745955		a/tATATTATAGTGGTGCTGCT	20	TATTAA	AAAAAAATATATATATATA	AA	19	21
chr13	54289713-54289815		AAGAAAt/gAAGCTCTAATGGg/aGG	22	TCTTAA	AAAAAAAAAAAAAAAAAAA	AA	19	21
chr17	53345010-53345112			0
chr17	51221352-51221454		AATTTAA	7	ATTTGA	AAAAAATAAAAATAAAAAAAATAAATAAATAAATAATAATA	AA	41	43
chr17	5948342-5948444		GAAATCAA	8	TTTCCT	AACAAAAAAAAAAGGAAAAAA		21	21
chr17	53912750-53912852		GAAAATGCT	9	TTTCAA	AAAAAAAAAAAAA		13	13
chr17	52043296-52043397		AAGAATTg/aT	9	TCTTAA	AAAAAAAAAA	AA	10	12
chr17	20444663-20444756		ATAAAAAGT	9	TTATAT	AAAAAAAATAAATAAATAAAAAATAAAA	A	28	29
chr17	3051509-3051611		TAAAAGACCC	10	TTTAAA	AAAAAATAAAATAAAATAAAATAAAAAA		28	28
chr17	57243405-57243508		AAGAATGTTGA	11	TCTTAA	AAAAAAAAAAAAAA	AA	14	16
chr17	38200728-38200830		AAAAAAGAGt/cA	11	TTTTAT	AAAAAAAAAAAAAA	AAAAAA	14	20
chr17	3710586-3710686		AAGACAATGTC	11	TCTTCA	AAAAAAAAA	AA	9	11
chr17	71546382-71546483		AAAGAAATACCT	12	CTTTAT	AAAAAAAA	AAA	8	11
chr17	4983874-4983976		AAAGGCTg/at/aGTC	12	CTTTTT	AAAA	AAA	4	7
chr17	63428747-63428849		AAAGAAGCTGGC	12	CTTTAC	AAAAAAAAAAAAAAAAA	AAA	17	20
chr17	13778480-13778573		AAA-/g-/g-g/GGGTTCT	13	CTTTAA	AAAAAAAAAAAAAAAAAA	AAA	18	21
chr17	13811677-13811774		AAAAAAATTCTGT	13	TTTTAT	AAAAAAAAAAAAAAAAAA	AAAAAAA	18	25
chr17	74309253-74309355		AAAGATTTTAATA	13	CTTTAT	AAAAAAAAAAAAAAA	AAA	15	18
chr17	47594071-47594173		AAGACACCAGCGT	13	TCTTAG	AAAAAAAAAAAA	AA	12	14
chr17	36445329-36445429		AAAAATCa/gTTTTCA	14	TTTTAT	AAAAAAAAAAAAAAAA	AAAAA	16	21
chr17	47414019-47414121		AAAAATTGATTTTA	14	TTTTAT	AACAACAACAATA	AAAAA	13	18
chr17	4094078-4094171		AAAGAAACATGACC	14	CTTTAT	AAAAAAAAAAAAAAA	AAA	15	18
chr17	15918853-15918955		AAGTAGTGCATCTA	14	ACTTCT	AACAAAAAAAAAAAAAAAAAA	AA	21	23
chr17	8496681-8496780		AATTACTTAGAAGA	14	AATTTT	AAAGAAAAAAAATTTTTTTTT	AA	21	23
chr17	13271785-13271885		AAAa/gCCACCTAAAT	14	TTTTAT		AAAA	0	4
chr17	48731021-48731123		AAAAc/aAAATACATGT	15	TTTTAA	AAAAAAAAA	aaaaaaaa	9	17
chr17	5373243-5373345		AAAGAAATACATTTC	15	CTTTAA	AAAAAAAAAAAAAAAAGAA	AAA	19	22
chr17	10757494-10757596		AAGAAATGAACTACT	15	TCTTAC	aaaaaaaaaaa	AA	11	13
chr17	60512634-60512736		AAGAATCTGATAATA	15	TCTTCA	AAAAAAAAAAAAAAAAAAAAA	AA	21	23
chr17	37915303-37915406		ACAATGCCTGGTTCAG	16	TTGTAT	AAAAACAAAAAAAA	A	14	15
chr17	34131049-34131153		c/aAAc/aAAAAAATTTATT	16	TTTTAA	AACAA	CAAC	5	9
chr17	5234465-5234567		GAAAATGGCAGAAATT	16	TTTCAT	AAAAAAAAAAAAAAAAAA		18	18
chr17	17806968-17807070		AAAAAGAAAAAAATAG	16	TTTTAT	AAAA	AAAAA	4	9
chr17	69734494-69734596		AAAAATg/aGCTg/cACTTC	16	TTTTAT	AACAACAACAA	AAAAA	11	16
chr17	63926459-63926552		AAAAAATTATATATTA	16	TTTTAA	AAAAAAAAAA	AAAAAA	10	16
chr17	62544605-62544707		AAc/aGAAACAGAGTTCC	16	CTTTAA	AAAAAAAAAAAAAAAGA	AAA	17	20
chr17	6768971-6769072		AAGATTAACTTTTTCT	16	TCTTAA	AAAAAAAAAAAAAAAAA	AA	17	19
chr17	14450142-14450244		Ac/aAAAAGAAGACATAC	16	TTGTAA	AAAAAAAAAAAAAAAAA	AAAAAA	17	23
chr17	54332388-54332481		AAAAATACAAAAATTAG	17	TTTTAG	AAAAAAAAAAAA	AAAAA	12	17
chr17	38259136-38259238		GAGAAAAGGGGCTATCTG	18	TCTCAT	AA		2	2
chr17	52023462-52023564		AATAA-/aTAAATAATa/gATG	18	TATTAG	AAAAAAAAATAAAAATAAAAATAAAAAA	AA	28	30
chr17	34552120-34552222		a/-AAAGAAAATAAAAAAATG	19	TTTTGA	AAAAAAAG	AAAA	8	12
chr17	31083285-31083387		AAAACa/gTTTAt/aGGTTTAa/-CA	20	TTTTAT	aaaaaaagcaaacaaag	AAAA	17	21
chr17	50311575-50311666		AAAAATTa/-c/-t/-c-/AGTATTGGG	20	TTTTAA	AAAAAAAAAAAAAAAAAAAAAAA	AAAAA	23	28
chr17	34981806-34981899		AAGATTTAATAGATGGTCAG	20	TCTTAG	AAAAAAAAAAAA	AA	12	14
chr3	2911693	2911796		0		AAAAAGAAAAAGAAAAA
chr3	25989410	25989512		0		AACAACAACAACAACAAAAATTTAAA
chr3	53309846	53309949		0
chr3	64712017	64712109		0		aacaacaatAAAAAAAAAA
chr3	109250898	109250998		0
chr3	111748953	111749056		0		aaaaaataaaaataataataata
chr3	117473714	117473806		0		aacaacaacaacaacaaaaatta
chr3	118247123	118247217		0		aacaaaaaaaccctagaaatgaa
chr3	121983032	121983124		0		AAAAAAAGAAAATTTGGATGAAAA
chr3	124819334	124819415		0		aaaaaaaaaatatatatatatatatatatatataata
chr3	130224875	130224977		0		AACAACAACAAAAAAGAA
chr3	131938421	131938505		0
chr3	143208303	143208373		0		AAAAAAAAAAAAa
chr3	145142547	145142611		0
chr3	161254595	161254688		0
chr3	125848240	125848334	AAGAC	5	TCTTAT	aaaaaaaa	AA	8	10
chr3	172750996	172751090	AGAATT	6	TTCTAA	aaaaaaaaaaaaaaaaaaaaaaaaaaa	A	27	28
chr3	183240914	183241017	GAAAATT	7	TTTCAA	AAAAAAAAAAAAAAGAAA		18	18
chr3	9452756	9452859	AAAAAAAC	8	TTTTAA	AAAAAAA	AAAAAAA	7	14
chr3	12795656	12795758	AAAAt/aATT	8	TTTTAA	AATAACAACA	AAAAAA	10	16
chr3	75794770	75794864	AAAACACT	8	TTTTAA	aaaaaaaaaaaaaaacaaaaaaa	AAAA	23	27
chr3	31950778	31950872	Aa/gAATTTCC	9	TTTTAA	aaaaaaaaaaaaaaaaaaaaa	AAAA	21	25
chr3	40923690	40923784	AACTCGACC	9	AGTTCC	AAAAAAAAAAAAAAAGC	AA	17	19
chr3	157235728	157235830	AAGAAACTA	9	TCTTAA	aaaaaaaaaaaaaaaaaaaaaagaaaa	AA	27	29
chr3	18623042	18623145	AGAGGTCTCT	10	CTCTGG	aaaaaaaaaaaaaaaaaaaggaagaa	A	26	27
chr3	20039891	20039994	AAAg/aAAAAGG	10	TTTTAT	aaaaaaaaaa	AAA	10	13
chr3	47821027	47821120	AAAAAATTTT	10	TTTTGT	aacaaaaaaaaaaa	AAAAAA	14	20
chr3	57065959	57066062	Aa/cCAg/cTTTTC	10	TGTTAT	aaaaaaaaaaaaaaaaaaa	AA	19	21
chr3	62350857	62350916	AAa/tAATAATG	10	TTTTAA	aataataataataat	AAAAA	15	20
chr3	90886998	90887092	AAGAAATACT	10	TCTTAA	aaaaaaaaaaaaaaaaaa	AA	18	20
chr3	112139508	112139611	AAAGTCATGT	10	CTTTCA	aaaaaaaaaaaaaaaaa	AAA	17	20
chr3	138217899	138218002	AAAAAATAAA	10	TTTTGA	aaa	AAAAAA	3	9
chr3	151299848	151299951	AAGAACTTTA	10	TCTTAT	AAAAAAAAAAAAAAAAA	AA	17	19
chr3	153637921	153638015	TAAAAGCCAA	10	TTTAAA	aaaaaaataataatAAA		17	17
chr3	160517435	160517524	GAAAGCTTGC	10	TTTCAA			0	0
chr3	19778437	19778516	AAGAAATACAT	11	TCTTAA	AAAAAAAAAAAAAAAGAAAGA	AA	21	23
chr3	23825310	23825411	CAGATATTCTA	11	TCTGAT	AA		2	2
chr3	86952674	86952776	AAAAAAAa/tGTT	11	TTTTAT	AAAAAAAAAA	AAAAAAAA	10	18
chr3	93721552	93721655	AGAAAAAAAGG	11	TTCTAC	aaaaaaaaaaaaaaaaagaaaaagaaaaagaaaa	A	34	35
chr3	109099898	109099992	At/aAAGTGTATC	11	TTTTAG	AAAAAACAAAAAAAAAA	AAAA	17	21
chr3	139597619	139597722	AAATTt/cCTCTG	11	ATTTAG	aaaataataataataataatactctcgtttctcttcaaatcgtataaatctttcgccttttatc	AAA	64	67
chr3	177873347	177873454	AAAGAAGTTGA	11	CTTTAT	AAAAAAAAA	AAA	9	12
chr3	36456556	36456659	AAAAAGTACAAA	12	TTTTAA	aaaaaaaaaaaaaaaaa	AAAAA	17	22
chr3	58961026	58961120	AAAAt/cAGCTAGA	12	TTTTGT	AAAAAAAAAAA	AAAA	11	15
chr3	105050934	105051024	CAAAATGAAATA	12	TTTGGT	AA		2	2
chr3	114431210	114431303	AAAAAAAAAAAG	12	TTTTCA	AAAA	AAAAAAAAAAA	4	15
chr3	114913132	114913233	AAAa/tTTCAAAGC	12	ATTTAT	aaaaaaaaaaaaaaaaaa	AAAA	18	22
chr3	125966401	125966504	AAAg/aAAGTAAGA	12	TTTTAA	AAAAAAAAAAAAA	AAAAAA	13	19
chr3	145248084	145248185	a/tAAAAATCc/tGGA	12	TTTTTA	Aaaataaataaataaaaataaataataaataaataaataaataaataaa		49	49
chr3	170187596	170187699	AAGATTTCTATG	12	TCTTAA	AAAAAAAAAAAAAAA	AA	15	17
chr3	32543185	32543278	AAAg/aAAAATTTTT	13	TTTTAT	aaca	AAAAAAAA	4	12
chr3	46380597	46380700	AAAAAAGACTTGT	13	TTTTCA	AAAAAAAAA	AAAAAA	9	15
chr3	57307868	57307971	AAAAATTACTAGT	13	TTTTAT	AAAAAAAAAA	AAAAA	10	15
chr3	60441950	60442052	AAAAAGTCAAGAC	13	TTTTAT	AACAACAACAA	AAAAA	11	16
chr3	64631405	64631496	AAATAATGGTGGA	13	ATTTTG	AAAACAAAACAAAAAAC	AAA	17	20
chr3	67100071	67100164	AAAAGAAGAAGCA	13	TTTTAA	AAAAAAAAAAAA	AAAA	12	16
chr3	82197856	82197959	AAAAAATTAATTT	13	TTTTAT	AAAAAAAGAAA	AAAAAA	11	17
chr3	84818656	84818746	AAATTTa/tTTTa/tTT	13	ATTTAA	aaa	AAA	3	6
chr3	107207426	107207529	TTAAAAAGACATA	13	TTAACA	aaaaaaaaaaaaaaaaa		17	17
chr3	110650518	110650621	AAAAGAATAATCT	13	TTTTCC	AAAAAAAAAA	AAAA	10	14
chr3	143235082	143235185	AAATCTATGTTAC	13	ATTTAT	aaaaaaaaa	AAA	9	12
chr3	166381031	166381134	AAAAATGCCCTTA	13	TTTTGT	aaaaataaaaataaaaataaaataaaaat	AAAAA	29	34
chr3	181621106	181621209	AATAAATACACAG	13	TATTTA	aaaaaaaaaaaaataat	AA	17	19
chr3	1653108	1653211	AAAAAATTCAATTT	14	TTTTAA	AAAAAAA	AAAAAA	7	13
chr3	20015750	20015853	GAAAa/tTGTAATCCA	14	TTTCAG	AAAAAAAAAAAAA		13	13
chr3	22237698	22237802	AAAAAa/tAAGAAATA	14	TTTTAA	aaaaaaaaaaaaaaaaagaaataaaaTATGTATGGTACATGTTAAC	AAAAAAAA	46	54
chr3	40821869	40821972	AAATTCTTATGATA	14	ATTTAC	AAAAAAAAAAaa	AAA	12	15
chr3	48378909	48379012	TAATTTATGAAACA	14	ATTAAA	AAAAAaataataataataataa		22	22
chr3	59441062	59441156	AAAACATTt/gt/cTTGG	14	TTTTAT	AAAAAAAAAAAAAAA	AAAA	15	19
chr3	66848279	66848373	AAGGTGa/gTAGAGAT	14	CCTTAA	aaccaaaaaaaaaaaaaaaaA	AA	21	23
chr3	71719667	71719761	AGAAACTCTGAACA	14	TTGTGT	aaaaaaaa	A	8	9
chr3	98757330	98757433	GAAAATGAAAACTT	14	TTTCAA	AAAAAAAAAAAAAA		14	14
chr3	104499918	104500021	GAAACTt/gGTGCATG	14	TTTCAA	AAAAAAAAAAACCCA		15	15
chr3	110326950	110327037	AGATCATAGGAGGG	14	ATCTAA	aaaaaaagaaaa	A	12	13
chr3	123026747	123026850	AAGAACGTGCTTTA	14	TCTTAA	aaaaggaaaaaaaacaaaaa	AA	20	22
chr3	123314344	123314438	AAGCCTGGGAACAT	14	GCTTAA	AAAAAAAAAAAAAA	AA	14	16
chr3	134103860	134103963	AAGAAACTAATACA	14	TCTTAA	AGAAAAAAA	AA	9	11
chr3	138972593	138972697	AAAAACTTAAACAT	14	TTTTAA	AAAAA	AAAAA	5	10
chr3	140707811	140707915	ACAAAGTGCTTCTT	14	TTGTAA	aaaacaaaaacaaaaacaaaaaaaa	A	25	26
chr3	150885347	150885440	AAAATAATATTTTA	14	TTTTAA	AACAAA	AAAA	6	10
chr3	163774024	163774097	GGCa/-AAAAAAAATT	14	TTCCTA			0	0
chr3	163811119	163811222	AAAAAATGACAAAA	14	TTTTGG	aaaaaaaaaaaaaaa	AAAAAA	15	21
chr3	1798440	1798524	g/aAAAAGTGCTTAAAA	15	TTTTAA	AAAAAAA	AAAAA	7	12
chr3	2071319	2071422	AGAACTGGATCAGTA	15	TTCTAT	aaaaaaaaaaaaaaaaaaaaaaaaaaaaaaaaaaa	A	35	36
chr3	5295062	5295165	AAg/aAGTCTATAGAGA	15	TTTTGA	AAAAAAAACAA	AA	11	13
chr3	5917412	5917514	AAAGAGGAACTTTTC	15	CTTTAC	AAAAAAAAAA	AAA	10	13
chr3	16741011	16741114	AAG/AACTCTCCTTCGT	15	TTTTGA	aaaaaaaaaaaaaaaaaaaa	AA	20	22
chr3	27485243	27485346	AAATTCATTTTAGGC	15	ATTTAA	AAAAAAAAAAAAA	AAA	13	16
chr3	32359571	32359669	AAAg/aAAAGTATTCTT	15	TTTTAA	AAAAAAAA	AAAAAAA	8	15
chr3	44502088	44502191	GAAAGTATc/gTTTCTT	15	TTTCAT	AAAAAAAAA		9	9
chr3	49374409	49374512	AAAAAGg/cCTCTTATA	15	TTTTAC	AAAAAAAAAAAA	AAAAA	12	17
chr3	90042154	90042257	AAGGg/aGGTAATTGAG	15	CCTTAA	aaaaaaaaaaaaaaaaaaaaa	AA	21	23
chr3	96139436	96139525	AAAAAAAAATAGGCA	15	TTTTAA	AAA	AAAAAAAAA	3	12
chr3	99889590	99889693	ATAAATAAAATAAc/tA	15	TTATAA	AAAaaaataaaaaaataaaataaaaaataaaa	A	32	33
chr3	111392691	111392794	At/aAAGGAAGAGAAAA	15	TTTTGA	aaaaaaaaaaaaaaaaaaaaaaaaa	AAAA	25	29
chr3	116594945	116595048	Tc/aAATAGACTGTTTG	15	TTTAAA	aaaaaatataTATAATAAAAA		21	21
chr3	120514726	120514829	AAAAGTGTTGCAACA	15	TTTTAA	AAAAAAAAAAAAAAA	AAAA	15	19
chr3	121418713	121418815	AAt/aAAGCACTTTCTT	15	TTTTAA	AAAAAAAAAAA	AAAAA	11	16
chr3	124893858	124893961	GAAAGAAAAGATTAT	15	TTTCAA	aaaaaaaaaaaaaaaaaaaagaaa		24	24
chr3	126189646	126189719	GAAATGGAATTTATT	15	TTTCAA	aaaaaaaaaaaaaaagaaagaaagaaagaaagaaagaaagaaagaaagaaagaaagaaagaaagaaagaaagaaa		75	75
chr3	127573207	127573309	AAAAAg/aAAAAAGTCC	15	TTTTAA	AACAAAAAA	AAAAAaAAAAA	9	20
chr3	128605967	128606070	AAAAa/ta/tTTTAGGGTT	15	TTTTCA	aaaaaaaaaaaaaaa	AAAA	15	19
chr3	131637296	131637399	AAAAATATGAGTTAT	15	TTTTAT	AAAAAAAAAAA	AAAAA	11	16
chr3	155003683	155003786	Aa/tATATAa/tAAATTTT	15	TTTTAA	aaaaaaaaaatat	AAA	13	16
chr3	156111263	156111366	AAGAATATCAGTAAC	15	TCTTAT	AAAAAAAAAAAAA	AA	13	15
chr3	162454729	162454822	AAAAAATGTAAACTA	15	TTTTAG	AAAAAAAAAAAa	AAAAAA	12	18
chr3	164033401	164033502	GAAAAATGAATTATC	15	TTTCAA	aa		2	2
chr3	181753928	181754022	TAAAGTCCAGCACTG	15	TTTAAA	aaaaaaaaaataaataaataaaataaa		27	27
chr3	186545785	186545888	AAa/cAACTTGAATCCA	15	TTTTAG	AAAAAAAAAAAAACAAa	AAAAA	17	22
chr3	188409297	188409377	AAg/aAATAACAGAATA	15	TTTTAG	AAA	AAAAA	3	8
chr3	190067740	190067843	AAAAAAAAAAAAGAA	15	TTTTAG	aaaaaaa	AAAAAAAAAAAA	7	19
chr3	3077694	3077797	AAAATTAAAGATACTA	16	TTTTAT	aaaaaaaaaaaaaaaaaaa	AAAA	19	23
chr3	14928590	14928693	AAAAACTTTGGTGTTA	16	TTTTAT	aaaaaaaaaaaaaaaa	AAAAA	16	21
chr3	16388421	16388524	a/tAa/tATATATGTTACAG	16	TTTTAA	aaaaaaaaaaaaaaaacatatata	AAAA	24	28
chr3	19384198	19384301	AAAGAAAAAT/CGGAATC	16	CTTTAT	aaaaaaaaaaaaaaaaaaaaa	AAA	21	24
chr3	32782541	32782644	AAAGAATAATGGATCA	16	CTTTAT	AAAAAAAAAAAAA	AAA	13	16
chr3	42490973	42491076	AAAAATCACAGTTACT	16	TTTTAT	AAAAAAAAA	AAAAA	9	14
chr3	49304344	49304438	TAAAAATAATGg/aTTAT	16	TTTAAA	AAAaaataaataaataaataaa		22	22
chr3	85120235	85120328	AGAAAAACAGATTAAT	16	TTCTAA	aaaaaaaaaaaaaGAAAAAA	A	20	21
chr3	85563925	85564028	AAAACCACCCCAACCA	16	TTTTAT	aaaaaaaaaaaaaaaaa	AAAA	17	21
chr3	90179945	90180047	TAAAGTTAGAAGACCA	16	TTTAAT	aaaaaaaattaataaataaa		20	20
chr3	126429992	126430095	AAAt/aGTTGAATATCTC	16	TTTTGA	AAAAAAAAAa	AAAA	10	14
chr3	128621540	128621643	AAAg/aAAATAAg/aCATAT	16	TTTTAC	aaa	AAAAAAA	3	10
chr3	138903736	138903839	ACAACTATATATTCCC	16	TTGTAA	AAAAAAAAAAA	A	11	12
chr3	169555995	169556089	AAGAATTTAGGTACAT	16	TCTTAT	aacaaaaaataaataaaaatAAAA	AA	24	26
chr3	182258794	182258885	AAAAAAAAAAGAAAGA	16	TTTTGA	aacaacaacaaaaaaaaaaaa	AAAAAAAAAA	21	31
chr3	4500411	4500504	AGAAAAGGCCAGACTAG	17	TTCTAG	aaaaaaaaaaaTAAAGAAAGAAAGAAAGAAAAGAAA	A	36	37
chr3	23205087	23205190	AAAAAAATTCTAGAAAT	17	TTTTAC	aaaaaaaaaaaaaaaaa	AAAAAAA	17	24
chr3	25862330	25862433	GAAAACCTGAATTTTTA	17	TTTCAT	AAAAAAAAA		9	9
chr3	31118368	31118472	AGAAAATGTTTTGGGCA	17	TTCTAA	AAAAAAAAAAAAA	A	13	14
chr3	35406463	35406565	AAGAATACTCATGACCA	17	TCTTAA	AAAAAAAAAAAAA	AA	13	15
chr3	84059689	84059793	Ca/-AAAAAACTCAAAACT	17	TTTGAT	aaaaaaaaaaaaa		13	13
chr3	109997797	109997900	AAAGAATGTATATTATG	17	CTTTCC	AAAAAAAAAA	AAA	10	13
chr3	111778326	111778420	AAAAATTTTAAAAAATA	17	TTTTAT	aaaaaaaaaaaaaaaaa	AAAAA	17	22
chr3	123931877	123931980	AAGAAAAATGTGCTCTT	17	TCTTAA	aaaaaaaaaaaaaaaa	AA	16	18
chr3	168089869	168089972	AAAAGAAg/aTCTGAGATT	17	TTTTCT	aaaaaaaaaaaaaaaaaaa	AAAA	19	23
chr3	171235114	171235207	AGAAACCAAGTCCGATT	17	TTCTAT	aaaaaaaaaaa	A	11	12
chr3	16189890	16189983	Aaa/cAAAAAAAGTGGCTGT	18	TTTTAC	AACA	AAAAAAAAAA	4	14
chr3	81154632	81154727	At/aAATTAGTGGTGAAAGA	18	TTTTAA	aacaacaacaacaacaacaaca	AAAA	22	26
chr3	86138385	86138488	ATAAa/tAATAAAAAATTCA	18	TTATAA	AAAaataataataataataata	A	22	23
chr3	86479677	86479780	AACAAAAGTTTACTTCTA	18	TGTTCA		AA	0	2
chr3	99973793	99973896	AACAATAGTCAGGTTCTG	18	TGTTAA	aaaaaaaaaaaaaaaaaaaaaaaa	AA	24	26
chr3	104618033	104618136	AAc/aAAGAACGAAACTCCG	18	TTTTAC	aaaaaaaaaaaaaaaaaaaaaa	AAAAA	22	27
chr3	111293433	111293535	CAAACAAACAAACAAACA	18	TTTGAG	Aaaaa		5	5
chr3	116265307	116265410	GAAAATCTTCCAAAAACA	18	TTTCAA	aaaaaaaaaaaagaaaaaaaaaaa		24	24
chr3	162094498	162094597	AAAAACTGGTAAATTAAG	18	TTTTAA	Aaaaacaaaacaaaacaaaacaaaaaaaacaaaacaaaac	AAAAA	40	45
chr3	40858146	40858240	AAAt/aAAAAGAATTAACCTC	19	TTTTAA	AAAAAAAAAA	AAAAAAAA	10	18
chr3	53018426	53018492	AGAAAg/-At/cGGTGAATCCAG	19	TTCTAA	aaaaaaagaa	A	10	11
chr3	144119440	144119543	AAAAt/aAAGAATGAAGAAGA	19	TTTTGG	AAAAAAAAAAAaaaaa	AAAAAAA	16	23
chr3	151130733	151130827	AACAAATTTTCTGTTTTCG	19	TGTTTA		AA	0	2
chr3	170928279	170928382	AAAGAAAGAGAGGAAGAAG	19	CTTTCT	aaaaaaaaaaaaaaaaaaaaa	AAA	21	24
chr3	179178881	179178984	At/aAAAg/aAAATGCATTTTTT	19	TTTTAA	AAAAAA	AaAAAaAAA	6	15
chr3	60264891	60264992	Ac/tAATAATAt/aTAGGACACTT	20	TTATAT	aaataataata	A	11	12
chr3	39127131	39127234	AAg/aAGAAAt/aGAAAATATATGT	21	TTTTGG	AAAAAAAAAAAAA	AAAA	13	17
chr3	109954977	109955080	AAc/aAAAAt/gAATCTGATTGCACT	22	TGTTAC	aaaaaaaaaaa	AAAAAAA	11	18

## Sheet: Suppl_Table_S3
Supplemental Table S3. Putative full-length Platy-1 elements
Chromosome	Coordinates	Exclusions
chr1	69873307-69873403
chr1	194383498-194383597
chr1	203077828-203077924
chr2	9233219-9233322
chr2	18253162-18253263
chr2	61995838-61995933
chr2	151517789-151517891
chr2	191593238-191593332
chr3	21512621-21512723	X
chr3	80896303-80896403
chr3	99544699-99544801
chr4	34903208-34903303
chr4	71790871-71790967
chr5	72458183-72458285
chr5	126634488-126634591
chr5	140806829-140806931
chr5	144145609-144145712
chr6	10296048-10296149
chr6	97706197-97706289
chr6	119105720-119105819
chr6	134864254-134864338
chr6	144242922-144243009
chr6	146460130-146460232
chr7	15108-15210
chr7	3255255-3255350
chr7	5041590-5041685	X
chr7	45607051-45607161
chr8	109559164-109559262
chr8	119523632-119523735
chr9	58994908-58995005
chr9	63204073-63204173
chr9	67861163-67861265
chr9	113449930-113450032
chr10	55419988-55420091
chr10	69376309-69376405
chr10	76880669-76880784	X
chr10	111179959-111180073	X
chr11	28110957-28111054
chr11	65995663-65995760
chr12	27458842-27458944
chr13	90063493-90063595
chr14	31957564-31957679	X
chr14	59678028-59678130
chr15	10575367-10575468
chr15	33586504-33586596
chr15	39589394-39589490
chr16	39931609-39931706
chr16	41627857-41627959
chr17	67932102-67932198
chr18	1351901-1352001
chr18	10011750-10011850
chr18	23017170-23017271
chr19	42571491-42571594
chr19	45119592-45119693
chr21	16162777-16162878
chr22	4559420-4559526
chr22	18831701-18831804
chrX	21624219-21624314	X
chrUn	1583-1686
chrUn	5277-5372
chrRand	56387-56489
chr1	85206449-85206552
chr2	7324783-7324887
chr2	171086396-171086498
chr2	185393374-185393476
chr3	53309846-53309948
chr3	60264890-60264992
chr3	99889591-99889693
chr3	111293433-111293535
chr3	151299849-151299951
chr4	120152003-120152105
chr4	138924015-138924117
chr4	153354184-153354274
chr5	47233530-47233632
chr5	78080349-78080452
chr5	89479484-89479586
chr5	103823327-103823429
chr5	140980155-140980257
chr6	50571222-50571324
chr6	63512156-63512258
chr6	97905844-97905946
chr7	6778856-6778957
chr7	77894829-77894931
chr7	109667941-109668044
chr8	3453160-3453263
chr8	28931311-28931413
chr8	111212701-111212803
chr9	19308282-19308384
chr10	113450757-113450859
chr11	54016723-54016825
chr11	94790521-94790623
chr11	116752653-116752755
chr12	8826779-8826881
chr12	73639485-73639587
chr12	94811181-94811283
chr14	94407839-94407941
chr14	101966862-101966964
chr15	14390384-14390484
chr15	22588460-22588561
chr15	56981035-56981137
chr15	96360097-96360200
chr21	3961880-3961982
chr21	26457402-26457504
chrUn	2130-2232
chr1	14443655-14443755
chr1	82646882-82646982
chr1	100728503-100728604
chr1	132331025-132331113
chr1	134827036-134827138
chr2	59419821-59419923
chr4	34024019-34024121
chr6	34264545-34264646
chr7	44972004-44972106
chr7	128588103-128588205
chr8	64290415-64290517
chr9	60910188-60910290
chr10	75753306-75753408
chr11	40755417-40755519
chr12	98426114-98426216
chr13	57682602-57682704
chr14	22882098-22882200
chrX	135207754-135207856
chr1	182543764-182543866
chr2	28046311-28046414
chr3	19384201-19384301
chr3	114913132-114913232
chr3	116265307-116265409
chr3	166381030-166381133
chr4	30851728-30851830
chr4	71920202-71920304
chr4	118912330-118912432
chr4	149452260-149452360
chr5	46834128-46834231
chr6	16632079-16632182
chr7	9062859-9062961
chr7	117661277-117661379
chr7	127676405-127676507
chr8	19009595-19009694
chr8	101634990-101635091
chr10	9988676-9988778
chr11	48346903-48347004
chr11	126869491-126869594
chr13	7230192-7230295
chr13	62235728-62235830
chr15	10394326-10394429
chr15	48596339-48596441
chr16	39312315-39312417
chr16	56717340-56717443
chr18	564911-565012
chr18	1686066-1686169
chr18	42549557-42549657
chr19	28219270-28219373
chr19	42413773-42413874
chr21	3640562-3640664
chr22	48478816-48478918
chrX	108949393-108949495
chrRand	4547-4649
chr1	7754831-7754934
chr1	24331671-24331772
chr1	103556043-103556145
chr2	38810576-38810678
chr2	193682841-193682944
chr3	49374410-49374512
chr3	98757330-98757432
chr3	107207427-107207529
chr4	5614450-5614551
chr4	98750029-98750129
chr5	41630721-41630823
chr8	65037921-65038022
chr11	45972192-45972294
chr15	17537766-17537868
chr22	28814964-28815066
chrX	130867123-130867225
chr2	4114173-4114276
chr2	94771136-94771234
chr2	141701480-141701583
chr2	178171636-178171736
chr3	157235729-157235830
chr5	83132914-83133015
chr7	41542311-41542413
chr7	152780347-152780449
chr9	83416493-83416596
chr11	7167353-7167455
chr11	78090971-78091073
chr13	94756380-94756482
chr13	96934852-96934952
chr13	109902844-109902944
chr14	89282502-89282603
chr16	78628634-78628736
chr17	36445329-36445429
chr17	63428747-63428849
chr19	27799128-27799230
chr19	29594996-29595096
chr21	8482631-8482733
chr1	56410756-56410858
chr1	199289251-199289353
chr2	27915467-27915568
chr2	123556795-123556896
chr2	152984401-152984503
chr3	86952674-86952775
chr5	88371134-88371236
chr5	100544709-100544811
chr5	120604547-120604650
chr6	68124569-68124670
chr7	15728602-15728704
chr7	64567345-64567447
chr7	140046750-140046852
chr8	81654604-81654707
chr8	94028271-94028374
chr11	30087998-30088099
chr11	38878221-38878322
chr11	39174074-39174177
chr11	73240001-73240103
chr13	57144377-57144479
chr13	111360657-111360760
chr15	51930707-51930809
chr16	15277955-15278058
chr16	38443944-38444045
chr19	315352-315455
chr21	7056227-7056329
chr21	31827818-31827919
chr22	3229614-3229716
chr22	20500372-20500475
chrX	31722966-31723069
chrX	60192846-60192949
chrUn	1092-1193
chrUn	10417-10519
chr1	47953441-47953543
chr1	53283591-53283693
chr2	52978227-52978329
chr2	62863918-62864020
chr2	167991421-167991523
chr3	27485242-27485345
chr3	46380598-46380700
chr3	85563926-85564028
chr4	67857290-67857386
chr6	138430600-138430702
chr8	7125350-7125452
chr10	69861267-69861369
chr12	43813751-43813854
chr15	11574847-11574950
chr15	20948870-20948972
chr15	81466351-81466453
chr16	19579341-19579443
chrX	85318627-85318729
chrUn	3834-3937
chr2	173615902-173616004
chr3	2071322-2071422
chr3	44502088-44502190
chr4	30218058-30218160
chr6	132360544-132360647
chr8	104205830-104205932
chr8	111793660-111793762
chr10	4376526-4376628
chr12	19565402-19565503
chr15	33383711-33383813
chr21	10108347-10108449
chrUn	3553-3655
chr1	24175829-24175931
chr1	24972041-24972143
chr1	122219068-122219170
chr1	189814068-189814171
chr1	191489575-191489677
chr2	129601623-129601725
chr3	127573207-127573309
chr4	31079678-31079780
chr5	111623095-111623197
chr6	8828848-8828950
chr6	44688397-44688499
chr6	63571515-63571618
chr6	118903408-118903510
chr7	62849884-62849986
chr7	98219783-98219885
chr7	98230945-98231047
chr7	128712481-128712582
chr7	147836145-147836248
chr9	11091902-11092005
chr9	122444274-122444376
chr10	20171078-20171180
chr11	5309717-5309819
chr11	74195042-74195144
chr11	118567624-118567727
chr12	36481029-36481129
chr12	94946984-94947085
chr13	37106885-37106988
chr13	66812036-66812139
chr13	70042414-70042516
chr13	107140740-107140842
chr14	39907813-39907915
chr14	54113624-54113726
chr14	97172422-97172524
chr14	99757993-99758096
chr16	4257435-4257537
chr16	9473545-9473645
chr16	12604010-12604112
chr16	21517956-21518058
chr16	27097554-27097656
chr16	32345115-32345217
chr17	5234464-5234567
chr18	19627758-19627861
chr19	18525411-18525513
chr19	36013394-36013497
chr21	23141443-23141545
chr21	34374601-34374700
chr22	43191124-43191225
chrX	108352805-108352907
chrX	123056071-123056173
chrUn	35391-35493
chrUn	13300-13402
chrUn	2884-2986
chrUn	1140-1242
chrUn	4198-4299
chrRand	12256-12357
chr3	181621106-181621208
chr4	3353943-3354046
chr8	120348421-120348523
chr9	92074680-92074781
chr10	66850232-66850334
chr11	109833872-109833974
chr12	113845125-113845226
chr13	79436575-79436678
chr14	27225351-27225453
chr14	33382111-33382213
chr15	8703740-8703842
chr17	71546380-71546483
chr18	17467537-17467639
chr18	42043192-42043294
chr22	24785965-24786067
chrX	48226809-48226911
chrUn	6036-6138
chrRand	135875-135976
chr1	68809425-68809527
chr1	164985013-164985115
chr2	50869960-50870062
chr5	112894171-112894273
chr7	72675828-72675930
chr9	666822-666925
chr10	80051775-80051878
chr12	32660320-32660422
chr12	79423917-79424021
chr14	52671171-52671273
chr14	55193263-55193365
chr15	23153861-23153963
chr15	40886032-40886134
chr16	59333838-59333940
chr19	39893080-39893182
chrX	78439624-78439729
chrX	90201215-90201315
chrUn	2857-2960
chrRand	15564-15666
chr2	122226021-122226122
chr3	18623042-18623140
chr3	20039890-20039993
chr3	134103860-134103961
chr3	170928279-170928381
chr3	190067741-190067843
chr4	129572993-129573094
chr4	146293339-146293442
chr5	14397493-14397595
chr6	125844349-125844451
chr10	1943556-1943659
chr11	55525359-55525461
chr13	13070769-13070871
chr14	18696144-18696246
chr14	78095229-78095331
chr21	23727003-23727105
chrX	7359935-7360037
chrX	77734258-77734361
chrUn	1538-1641
chrRand	3396-3498
chr2	34987378-34987478
chr2	36537577-36537680
chr2	118326753-118326855
chr2	119760420-119760522
chr2	170815850-170815952
chr3	183240914-183241016
chr4	95301714-95301817
chr5	35655224-35655330
chr6	62090828-62090930
chr6	90948854-90948957
chr6	150944740-150944840
chr7	129781259-129781359
chr7	132964279-132964382
chr8	18306371-18306473
chr10	50770426-50770529
chr11	130336251-130336354
chr12	110300261-110300363
chr15	2306137-2306239
chrX	110831407-110831509
chrUn	27831-27932
chrRand	18535-18634
chr1	4335016-4335119
chr1	12155270-12155372
chr1	32404412-32404515
chr1	39917615-39917717
chr1	74381814-74381916
chr1	89952117-89952217
chr1	91486371-91486473
chr1	105318201-105318303
chr1	116122427-116122530
chr1	118823120-118823221
chr1	134623671-134623773
chr1	155800252-155800354
chr1	166235365-166235467
chr1	183867728-183867830
chr1	187419668-187419770
chr2	18248139-18248242
chr2	34510696-34510798
chr2	44806031-44806133
chr2	100764380-100764482
chr2	112120851-112120954
chr2	131588866-131588968
chr2	153406370-153406470
chr2	155714890-155714991
chr2	169599226-169599328
chr3	9452757-9452860
chr3	25862330-25862432
chr3	32782540-32782643
chr3	40821869-40821971
chr3	42490974-42491076
chr3	48378909-48379011
chr3	57065959-57066061
chr3	86138385-86138487
chr3	93721551-93721654
chr3	121418713-121418814
chr3	123931878-123931980
chr3	125966401-125966503
chr3	126429992-126430094
chr3	162094498-162094597
chr4	55473892-55473994
chr4	57121154-57121256
chr4	63749983-63750085
chr4	100588338-100588441
chr4	101755333-101755435
chr4	116340163-116340265
chr4	121850334-121850436
chr4	168937158-168937260
chr5	650981-651083
chr5	1294012-1294114
chr5	3647243-3647345
chr5	13611440-13611543
chr5	25343552-25343654
chr5	27991152-27991251
chr5	45662043-45662145
chr5	61684680-61684783
chr5	97244094-97244196
chr5	105444130-105444233
chr5	119161439-119161541
chr5	144924891-144924993
chr6	29533445-29533546
chr6	33676929-33677032
chr6	85566058-85566183
chr6	116648299-116648401
chr6	117964763-117964866
chr6	138726681-138726782
chr7	67032269-67032371
chr7	83010885-83010985
chr7	98707654-98707756
chr7	112425009-112425111
chr7	118004649-118004752
chr7	147853076-147853178
chr7	153170178-153170278
chr8	12641192-12641295
chr8	84010544-84010646
chr8	93780431-93780534
chr8	128059162-128059264
chr9	12486303-12486404
chr9	17470601-17470704
chr9	32378072-32378173
chr9	37998284-37998387
chr9	43226854-43226956
chr9	74757979-74758082
chr9	101924265-101924367
chr9	116472203-116472305
chr9	124016445-124016547
chr10	4606245-4606348
chr10	5480356-5480459
chr10	6829155-6829256
chr10	43359153-43359256
chr10	73432352-73432454
chr10	85707132-85707234
chr10	91707954-91708056
chr10	103009597-103009700
chr10	127632376-127632478
chr11	10098067-10098169
chr11	73666930-73667032
chr11	80979797-80979898
chr12	25518437-25518539
chr12	56187801-56187903
chr12	60979295-60979397
chr12	76169424-76169526
chr12	106299541-106299644
chr12	120038987-120039087
chr13	44253745-44253845
chr13	100682460-100682562
chr13	111390955-111391057
chr14	1277782-1277884
chr14	12004102-12004204
chr14	21408860-21408963
chr14	27438264-27438367
chr14	33430031-33430134
chr14	42509161-42509264
chr14	63512317-63512419
chr15	6873050-6873153
chr15	19089295-19089396
chr15	33272483-33272586
chr15	39290489-39290591
chr15	58871817-58871920
chr15	61558556-61558658
chr15	94850870-94850972
chr16	6037243-6037342
chr16	8147266-8147369
chr16	42216658-42216760
chr16	69467664-69467767
chr16	74789059-74789161
chr16	79681092-79681194
chr16	85494592-85494694
chr16	91005399-91005501
chr17	38200728-38200830
chr17	48731021-48731123
chr17	53912750-53912852
chr17	74309253-74309355
chr18	19134122-19134225
chr18	40922902-40923005
chr19	2695145-2695247
chr19	36601699-36601799
chr19	44812557-44812659
chr19	47450746-47450849
chr19	48652538-48652663
chr20	21509310-21509412
chr21	5274761-5274863
chr22	19720063-19720166
chr22	20272063-20272165
chr22	41448084-41448187
chr22	43405352-43405455
chrX	12862053-12862155
chrX	32891184-32891286
chrX	36606713-36606816
chrX	39789158-39789260
chrX	62642889-62642991
chrX	74513038-74513140
chrX	83324257-83324359
chrX	87392727-87392830
chrX	128914257-128914359
chrUn	1938-2038
chrUn	1779890-1779992
chrUn	466712-466813
chrUn	467387-467490
chrUn	274038-274140
chrUn	11479-11582
chr1	120163544-120163646
chr1	135797944-135798046
chr2	13523141-13523243
chr2	75509725-75509827
chr3	3077695-3077797
chr6	1855884-1855986
chr9	54276202-54276304
chr11	96708875-96708977
chr11	100477803-100477905
chr12	3482258-3482360
chr16	15546654-15546756
chr20	32323274-32323377
chr21	26354275-26354377
chr21	38864504-38864606
chrX	52152725-52152827
chr1	184353680-184353782
chr2	38896769-38896870
chr3	82197857-82197960
chr6	8499359-8499461
chr6	15750566-15750669
chr7	133130980-133131082
chr7	142356461-142356563
chr8	13071500-13071602
chr10	80040457-80040559
chr13	68899-69001
chr19	47262383-47262483
chr21	1735460-1735562
chr22	9094168-9094269
chr1	48740016-48740117
chr1	92404207-92404309
chr1	125815479-125815581
chr2	54609757-54609858
chr2	116894057-116894159
chr2	166402105-166402207
chr3	109954978-109955080
chr3	123026747-123026849
chr4	137357243-137357345
chr5	22091-22191
chr5	57612024-57612127
chr7	110430886-110430988
chr8	21941169-21941267
chr8	70568601-70568704
chr9	10801373-10801475
chr9	12727728-12727830
chr10	51312175-51312276
chr10	62854182-62854284
chr10	110453902-110454004
chr11	79800351-79800454
chr12	73688444-73688546
chr12	83729591-83729694
chr13	32869429-32869530
chr13	60623825-60623928
chr13	86238499-86238601
chr13	90381323-90381424
chr14	29186552-29186649
chr14	68816463-68816565
chr15	45035050-45035152
chr16	12089587-12089684
chr16	84388836-84388936
chr17	62544605-62544707
chr18	2026380-2026483
chr19	28344555-28344656
chrX	80987627-80987728
chr1	113722515-113722615
chr1	174862954-174863056
chr1	209904060-209904162
chr2	50330109-50330211
chr2	102826139-102826240
chr2	149634769-149634871
chr4	105910029-105910131
chr4	107763383-107763485
chr6	18497950-18498052
chr7	54469093-54469196
chr8	30497683-30497784
chr9	31480874-31480977
chr9	51819465-51819567
chr9	88455680-88455780
chr12	21694011-21694113
chr13	23938759-23938862
chr13	33471047-33471149
chr14	94678102-94678201
chr15	27399946-27400046
chr15	77449964-77450065
chr16	4133699-4133801
chr17	10757494-10757596
chr18	34394519-34394621
chr18	40825397-40825499
chr21	6199584-6199686
chr1	20736936-20737038
chr1	44757799-44757901
chr1	140058767-140058869
chr1	188361372-188361475
chr1	192890414-192890517
chr2	24455234-24455336
chr2	39952908-39953011
chr2	48657206-48657308
chr2	134887045-134887147
chr3	144119440-144119542
chr3	155003682-155003785
chr3	168089872-168089972
chr4	14445599-14445702
chr4	101519930-101520032
chr4	150961783-150961885
chr4	157225200-157225301
chr4	163127357-163127460
chr5	35319354-35319456
chr5	85048163-85048266
chr6	16681204-16681307
chr6	77107471-77107573
chr6	108294591-108294693
chr6	108338476-108338578
chr7	48239457-48239559
chr7	72890108-72890210
chr7	105484700-105484803
chr7	121896898-121897000
chr7	143496377-143496480
chr7	152191936-152192037
chr8	1115202-1115304
chr8	106239441-106239564
chr9	63463051-63463153
chr9	122459503-122459605
chr9	123258216-123258318
chr10	6723613-6723715
chr10	98892599-98892701
chr10	123152351-123152452
chr11	19856662-19856763
chr11	47030934-47031034
chr11	93338247-93338349
chr12	104995536-104995638
chr13	9540607-9540709
chr13	30095422-30095522
chr15	86455044-86455146
chr16	34807748-34807850
chr16	37843922-37844024
chr16	56789829-56789929
chr16	73412289-73412391
chr16	88526841-88526943
chr16	96446573-96446675
chr17	14450142-14450244
chr17	51221352-51221454
chrX	47138018-47138120
chrX	58606942-58607044
chrX	71264683-71264784
chrX	71832479-71832581
chrX	81772946-81773047
chrX	103166868-103166970
chrX	116906384-116906487
chrUn	7097-7200
chrUn	1685-1787
chrUn	515-617
chrRand	361927-362030
chr1	11690817-11690918
chr1	81876974-81877077
chr2	115093437-115093539
chr3	14928590-14928692
chr4	122049626-122049728
chr5	92706717-92706819
chr6	78150455-78150557
chr7	50419290-50419393
chr7	78936676-78936778
chr7	140274144-140274245
chr10	24606166-24606268
chr10	93037788-93037889
chr10	106111638-106111741
chr11	123075696-123075798
chr12	51422872-51422975
chr13	2817363-2817465
chr15	12926752-12926853
chr15	23036175-23036277
chr15	95232282-95232384
chr18	40924015-40924118
chr19	982581-982684
chr20	21975295-21975397
chr20	34068002-34068104
chr21	26901989-26902092
chr22	21066714-21066817
chr22	44319994-44320097
chrUn	15455-15558
chrUn	349793-349896
chrUn	19484-19586
chrRand	7578-7679
chr1	11048738-11048841
chr1	78111260-78111362
chr1	97453482-97453585
chr2	83678822-83678924
chr2	108282664-108282765
chr2	133484702-133484804
chr3	35406464-35406565
chr3	90042155-90042257
chr3	138217900-138218002
chr3	138903736-138903838
chr5	64782453-64782555
chr5	76345847-76345946
chr5	117968379-117968481
chr5	125741606-125741708
chr5	156674117-156674220
chr6	41506340-41506443
chr6	136570104-136570207
chr7	114074541-114074643
chr7	140257858-140257960
chr8	18552510-18552612
chr8	100300185-100300287
chr8	120738399-120738501
chr10	50553888-50553990
chr11	71971929-71972030
chr11	77391631-77391733
chr12	3903852-3903952
chr12	19590168-19590270
chr12	58206845-58206947
chr14	16964062-16964165
chr14	37544876-37544978
chr15	10294675-10294778
chr16	8628472-8628575
chr17	52023462-52023564
chr18	36247120-36247221
chr19	2782674-2782776
chr19	24535928-24536028
chr19	27556154-27556256
chr20	28885954-28886057
chr21	32193342-32193440
chrX	99254516-99254618
chrUn	1535-1637
chrUn	4021-4123
chrUn	4153-4255
chr1	23232587-23232678
chr1	47577846-47577939
chr1	55008925-55009018
chr1	90986006-90986100
chr1	116600931-116601024
chr1	143418926-143419019
chr1	204548179-204548272
chr2	704815-704907
chr2	42833632-42833725
chr2	65657080-65657173
chr2	77096753-77096846
chr2	101053488-101053581
chr2	123251625-123251719
chr2	155983950-155984043
chr2	165718552-165718645
chr2	177195940-177196033
chr2	183520831-183520924
chr2	185180807-185180898
chr2	190606093-190606184
chr3	31950779-31950872
chr3	40923690-40923783
chr3	58961027-58961120
chr3	59441063-59441157
chr3	71719667-71719760
chr3	75794771-75794865
chr3	90886999-90887092
chr3	109099899-109099992
chr3	111778326-111778419
chr3	123314345-123314438
chr3	181753928-181754021
chr4	36025826-36025919
chr4	65175131-65175224
chr4	152827587-152827680
chr4	166563989-166564082
chr5	29291587-29291681
chr5	30649178-30649272
chr5	49035258-49035352
chr5	61480222-61480315
chr5	64397903-64397996
chr5	83013720-83013813
chr5	130979342-130979435
chr5	144582689-144582782
chr5	153162657-153162750
chr5	156712535-156712627
chr6	8201639-8201732
chr6	24584648-24584742
chr6	28962325-28962418
chr6	38317142-38317235
chr6	40549078-40549172
chr6	44217354-44217447
chr6	60349990-60350084
chr6	79978562-79978655
chr6	81265253-81265346
chr6	86246898-86246991
chr6	103438968-103439062
chr6	110444708-110444801
chr6	122001553-122001646
chr7	10054341-10054434
chr7	19517761-19517854
chr7	29184599-29184692
chr7	30696067-30696160
chr7	120999885-120999978
chr7	127092431-127092524
chr7	129567450-129567543
chr7	154412704-154412797
chr8	6640448-6640541
chr8	20074263-20074356
chr8	24447955-24448048
chr8	53496152-53496245
chr8	83024345-83024438
chr8	109581985-109582078
chr8	125987977-125988070
chr8	126109761-126109854
chr9	3780136-3780229
chr9	70296110-70296200
chr9	120463993-120464086
chr10	7106215-7106307
chr10	20409947-20410041
chr10	24173700-24173793
chr10	48020073-48020166
chr10	67889684-67889777
chr10	98447163-98447255
chr10	106980593-106980687
chr10	123535195-123535287
chr11	11928827-11928920
chr11	71990589-71990682
chr11	91118541-91118633
chr11	114672128-114672221
chr12	8489243-8489335
chr12	22035324-22035418
chr12	62203663-62203756
chr13	22079564-22079657
chr13	80088011-80088104
chr13	80952088-80952181
chr13	93252089-93252183
chr13	96765432-96765526
chr13	107314888-107314981
chr13	109326391-109326484
chr14	65342024-65342114
chr14	67506798-67506891
chr14	78488355-78488447
chr14	84452645-84452737
chr15	18388334-18388425
chr15	23127633-23127726
chr15	38542435-38542528
chr15	64035612-64035705
chr15	82205161-82205255
chr16	18377674-18377755
chr16	22499050-22499143
chr16	47118846-47118938
chr16	50482203-50482296
chr16	51126032-51126124
chr16	65321500-65321592
chr16	75229195-75229288
chr17	4094078-4094171
chr17	13778480-13778573
chr17	20444663-20444756
chr17	34981806-34981899
chr17	42891952-42892045
chr17	50311575-50311666
chr18	3493924-3494017
chr18	4461779-4461870
chr18	10257544-10257637
chr19	13498747-13498839
chr19	14944080-14944173
chr19	45674647-45674741
chr20	22221044-22221136
chr21	28433382-28433474
chr21	41732009-41732101
chr22	19053360-19053453
chr22	28545253-28545347
chrX	20426299-20426392
chrX	45487061-45487154
chrX	76495653-76495746
chrX	103328381-103328474
chrX	129840157-129840250
chrX	133065408-133065501
chrUn	3120-3213
chrUn	3226-3319
chrUn	1145313-1145406
chrRand	21076-21170
chrRand	24687-24780
chrRand	9462-9553
chr1	141861890-141861983
chr2	104646665-104646758
chr2	170064113-170064204
chr3	40858146-40858239
chr3	49304343-49304437
chr4	143205777-143205870
chr5	33020899-33020992
chr6	7933316-7933409
chr6	22363732-22363825
chr6	40550853-40550947
chr8	3424262-3424356
chr8	22278325-22278418
chr8	55677723-55677816
chr9	1570302-1570395
chr10	117714519-117714612
chr11	69498690-69498783
chr11	79619104-79619174
chr13	74855922-74856015
chr14	33306760-33306853
chr19	21421390-21421411
chr3	67100072-67100164
chr3	162454730-162454822
chr3	172750999-172751090
chr4	5067805-5067898
chr6	90685759-90685852
chr7	29909449-29909543
chr7	80595987-80596080
chr10	55938831-55938924
chr13	21320367-21320461
chr16	16464392-16464482
chr17	53025764-53025855
chr17	54332387-54332481
chr17	63926459-63926552
chr21	33139652-33139745
chrUn	20760-20853
chrRand	11223-11316
chr1	22003842-22003945
chr1	30766964-30767067
chr1	73507365-73507469
chr1	123733724-123733827
chr1	141499335-141499438
chr1	143166937-143167041
chr1	155594687-155594790
chr2	67303126-67303229
chr2	115147052-115147155
chr2	126660398-126660501
chr2	156837630-156837734
chr2	156889531-156889634
chr3	22237698-22237801
chr3	31118368-31118471
chr3	84059690-84059793
chr3	128621539-128621642
chr3	138972593-138972696
chr3	140707812-140707915
chr3	177873347-177873453
chr4	873268-873372
chr4	23245763-23245866
chr4	141477189-141477292
chr4	151286828-151286931
chr5	22835737-22835840
chr5	42725121-42725225
chr5	53516703-53516806
chr5	100486798-100486901
chr5	112898152-112898255
chr5	125436497-125436601
chr6	2259252-2259355
chr6	45028811-45028914
chr6	103112938-103113041
chr6	103113978-103114081
chr6	157135399-157135503
chr7	43496152-43496254
chr7	47091906-47092009
chr7	60513207-60513310
chr7	69489569-69489672
chr7	88556450-88556553
chr7	144555989-144556090
chr8	28411897-28412001
chr8	38295057-38295160
chr8	53715488-53715591
chr8	69700841-69700945
chr8	118942448-118942551
chr8	123693057-123693160
chr9	20153583-20153687
chr9	34604033-34604137
chr9	87656753-87656856
chr9	90090566-90090668
chr9	97553183-97553286
chr9	101048363-101048467
chr10	52729527-52729629
chr10	62194951-62195054
chr10	100842639-100842742
chr10	108811297-108811400
chr11	38295378-38295480
chr11	64300120-64300223
chr11	71522275-71522378
chr12	4447004-4447107
chr12	11955289-11955392
chr12	37392537-37392640
chr12	93326749-93326851
chr13	25420683-25420786
chr13	32667793-32667895
chr13	76141229-76141333
chr13	106272590-106272693
chr14	52554864-52554968
chr14	65577539-65577643
chr15	36545543-36545646
chr15	43469973-43470076
chr15	54106239-54106340
chr15	58480523-58480626
chr15	62093186-62093289
chr15	72140902-72141006
chr15	85785266-85785369
chr16	28540043-28540146
chr16	46458968-46459071
chr17	1020888-1020992
chr17	37915303-37915407
chr17	57243405-57243508
chr19	3457446-3457547
chr19	45674521-45674625
chr20	14271353-14271455
chr20	18733317-18733420
chr22	9085440-9085543
chrX	70746980-70747084
chrX	92019068-92019172
chrX	141076620-141076723
chrUn	55291-55393
chrRand	2434-2537
chrRand	75509-75612
chrRand	123905-124008
chrRand	126133-126236
chrRand	3510-3612
chr1	175311055-175311154
chr2	16141531-16141628
chr2	37620435-37620534
chr2	56937433-56937535
chr4	18649086-18649184
chr4	42629467-42629563
chr4	78916227-78916314
chr5	130997762-130997855
chr5	154375652-154375753
chr7	58784269-58784372
chr7	60542171-60542260
chr9	70168414-70168516
chr10	106490227-106490322
chr11	119362965-119363067
chr11	121050625-121050721
chr12	28646197-28646238
chr12	44405943-44406045
chr12	44484025-44484126
chr13	57546377-57546476
chr14	13930013-13930114
chr18	26846724-26846826
chr18	38450778-38450879
chr19	25003945-25004046
chr19	28972694-28972787
chrX	18372737-18372838
chrRand	4395-4496
chrRand	8193-8294
chr1	141524565-141524667
chr1	173961304-173961406
chr1	189203436-189203537
chr2	466762-466859
chr2	39440250-39440352
chr2	114460754-114460856
chr3	54029100-54029203
chr3	153637912-153638014
chr4	43167837-43167919
chr4	89403077-89403187
chr5	4942133-4942234
chr5	83596841-83596940
chr5	125301191-125301294
chr5	127894894-127894995
chr6	42894524-42894626
chr6	67266494-67266595
chr7	11235416-11235518
chr7	82322173-82322278
chr7	99118699-99118787
chr7	128244469-128244571
chr8	70476247-70476349
chr8	73555534-73555636
chr8	105441145-105441247
chr9	34989711-34989813
chr9	35037709-35037812
chr9	115894939-115895041
chr10	32975886-32975988
chr10	79167113-79167215
chr10	110135015-110135117
chr10	126185301-126185403
chr11	24236385-24236487
chr11	115080680-115080782
chr13	80039715-80039816
chr14	23171753-23171851
chr14	94592873-94592975
chr15	96775229-96775330
chr16	12998127-12998228
chr16	74546843-74546945
chr17	73596730-73596832
chr18	27254799-27254903
chr19	33804209-33804309
chr20	42387929-42388030
chr21	30094183-30094280
chr22	20265880-20265977
chr22	29082901-29083001
chrX	22690484-22690586
chrX	42480750-42480851
chrX	71608051-71608152
chrX	103289677-103289778
chrX	107660947-107661049
chrRand	36418-36521
chr1	155870544-155870646
chr1	182871628-182871721
chr2	26950570-26950665
chr2	62066116-62066218
chr2	158774906-158775010
chr2	178160690-178160790
chr3	64631395-64631496
chr4	121437759-121437861
chr5	43911449-43911550
chr6	14100581-14100683
chr7	51381260-51381361
chr8	41347621-41347723
chr8	106646715-106646816
chr9	105284436-105284537
chr10	17824597-17824699
chr11	5717942-5718045
chr12	55772796-55772898
chr12	97997553-97997655
chr13	45880586-45880688
chr13	57210423-57210523
chr13	79825529-79825631
chr15	6454479-6454581
chr15	74161249-74161350
chr16	66400061-66400163
chr16	72848037-72848132
chr17	31083285-31083387
chr17	31085215-31085317
chr19	1124594-1124694
chr19	4591470-4591570
chr22	40207850-40207952
chrX	2481738-2481843
chrX	48046985-48047087
chrX	56196534-56196636
chrX	127719316-127719418
chrUn	2304-2404
chr2	8408864-8408966
chr2	37740613-37740715
chr2	168625319-168625421
chr3	53018397-53018501
chr4	21198172-21198274
chr4	75239372-75239473
chr4	115140726-115140829
chr6	50158347-50158450
chr8	105734778-105734876
chr9	2388908-2389003
chr9	67702143-67702240
chr11	76240488-76240578
chr12	55535743-55535844
chr12	78032306-78032407
chr15	88855568-88855671
chr16	43299614-43299715
chr17	52043296-52043397
chr18	29046165-29046265
chr19	46544885-46544991
chr22	40760630-40760732
chr1	76900418-76900520
chr1	135965543-135965645
chr2	31228421-31228523
chr5	63076384-63076486
chr5	100340811-100340912
chr5	109497951-109498054
chr7	36035926-36036028
chr8	17697239-17697341
chr9	39291854-39291956
chr9	49699934-49700036
chr10	117746031-117746133
chr12	79381811-79381896
chr13	7293168-7293265
chr14	59283039-59283140
chr15	76620908-76621010
chr18	40260601-40260703
chr19	35605713-35605815
chr19	38021411-38021509
chr22	19725078-19725179
chr2	108027121-108027223
chr3	109250899-109250998
chr3	110326941-110327042
chr5	5412596-5412698
chr6	95863074-95863174
chr9	26032811-26032911
chr9	45826044-45826145
chr11	9371204-9371307
chr11	16341059-16341159
chr12	28231580-28231682
chr13	48990603-48990704
chr14	67054361-67054462
chr14	74835245-74835348
chr17	13811677-13811774
chr19	4541522-4541626
chr22	6373628-6373729
chrX	120679612-120679710
chrX	140932486-140932574
chrUn	677-777
chr2	188882934-188883036
chr4	34847426-34847553
chr5	133385598-133385705
chr9	33082742-33082844
chr10	14390064-14390169
chr11	60266254-60266360
chr22	42438884-42438989
chr22	47855796-47855900
chr1	201050135-201050237
chr4	155035363-155035450
chr5	73737046-73737148
chr5	77818049-77818124
chr6	88386608-88386708
chr10	96084704-96084806
chr11	66883692-66883794
chr14	33322356-33322458
chr15	3430343-3430445
chr16	46363987-46364084
chr22	11381973-11382075
chrX	12946903-12947006
chrX	114232762-114232863
chrUn	39243-39345
chrUn	29311-29413
chr1	14745693-14745793
chr1	34176254-34176354
chr1	72532261-72532363
chr1	78343726-78343828
chr1	102824116-102824217
chr1	128646254-128646354
chr2	684810-684912
chr2	60554688-60554789
chr2	176900692-176900793
chr3	16189880-16189982
chr3	32543176-32543277
chr3	81154630-81154733
chr3	84818656-84818757
chr3	150885337-150885439
chr3	164033401-164033502
chr3	182258794-182258895
chr5	21148523-21148625
chr5	22319716-22319818
chr5	61917454-61917556
chr5	62104093-62104194
chr5	111599663-111599761
chr5	111600271-111600369
chr5	125159698-125159796
chr6	1453315-1453415
chr6	14757151-14757251
chr6	83175954-83176053
chr7	22109847-22109949
chr7	43055111-43055212
chr7	141697576-141697681
chr8	3580767-3580869
chr8	55554157-55554257
chr8	88051374-88051476
chr9	9022594-9022696
chr9	110886966-110887068
chr10	2146716-2146816
chr10	3800766-3800868
chr10	90679310-90679412
chr10	92817479-92817581
chr10	105672442-105672543
chr11	66414095-66414190
chr11	67013680-67013781
chr12	37552633-37552734
chr12	90715720-90715822
chr13	7301254-7301356
chr13	47349581-47349681
chr13	64169173-64169268
chr14	70654190-70654292
chr15	18106494-18106596
chr15	41159473-41159576
chr15	86627701-86627802
chr16	57898085-57898186
chr16	64272597-64272697
chr16	68636449-68636551
chr17	13943874-13943976
chr17	17806968-17807070
chr17	34131049-34131153
chr17	34552120-34552222
chr17	73986388-73986489
chr18	23245176-23245276
chr18	24535725-24535827
chr20	27779173-27779275
chr22	17907498-17907583
chr22	19496504-19496605
chrX	19499375-19499474
chrX	32687115-32687213
chrUn	4349-4452
chrUn	910-1012
chrUn	1481-1584
chrUn	76459-76559
chrUn	61462-61565
chrRand	3820-3922
chrRand	7910-8012
chrRand	13801-13903
chrRand	8399-8502
chr1	130305783-130305885
chr1	149083306-149083408
chr1	184337668-184337774
chr1	193804798-193804900
chr2	3545497-3545599
chr2	8715155-8715257
chr2	8716259-8716361
chr2	18388511-18388608
chr2	29575913-29576014
chr2	30281620-30281723
chr2	79102060-79102162
chr2	84981023-84981125
chr3	114431211-114431313
chr3	116594946-116595049
chr3	117473714-117473815
chr3	130224875-130224977
chr4	34440662-34440764
chr4	98641851-98641951
chr4	139544523-139544625
chr5	47273849-47273950
chr5	92723865-92723964
chr5	95436038-95436137
chr5	97410374-97410476
chr5	130889616-130889718
chr6	15721316-15721417
chr6	36006910-36007013
chr6	67677501-67677604
chr7	61186516-61186618
chr7	107913031-107913133
chr7	152049310-152049413
chr7	152054115-152054231
chr8	5060058-5060160
chr8	29821747-29821849
chr8	64170082-64170185
chr8	93275361-93275463
chr8	114869318-114869420
chr9	4239215-4239315
chr9	7128956-7129058
chr9	9639754-9639855
chr9	45200759-45200864
chr9	66220153-66220255
chr10	41516633-41516737
chr10	59728749-59728850
chr10	93105855-93105957
chr11	7528014-7528116
chr11	7530530-7530632
chr12	27463615-27463718
chr12	39774657-39774758
chr12	49800071-49800173
chr12	58479613-58479714
chr14	36795816-36795912
chr14	78397786-78397889
chr15	24616722-24616824
chr16	5156009-5156111
chr16	54363411-54363514
chr16	71296013-71296115
chr16	75076581-75076683
chr17	4983874-4983976
chr18	769667-769769
chr18	4181839-4181941
chr18	12445180-12445282
chr18	39974910-39975013
chr18	42242793-42242895
chr19	24464654-24464756
chr20	6977496-6977596
chr20	13325484-13325586
chr20	20118250-20118344
chr20	20806459-20806563
chr20	40460558-40460660
chr22	20583811-20583913
chr22	43807141-43807244
chr22	46817062-46817164
chrX	2527888-2527990
chrX	53039624-53039726
chrX	65841426-65841528
chrX	130277931-130278033
chrUn	225719-225821
chrRand	4061-4163
chrRand	18863-18965
chrRand	8824-8926
chr1	29394727-29394825
chr1	56772416-56772518
chr1	95700335-95700436
chr1	115159729-115159826
chr1	121153691-121153790
chr1	137131581-137131682
chr1	172859653-172859755
chr1	194207808-194207907
chr1	207712733-207712837
chr2	18894682-18894784
chr2	74475887-74475985
chr2	100783008-100783110
chr2	198840840-198840940
chr3	4500412-4500514
chr3	64712007-64712109
chr3	85120225-85120327
chr3	86479677-86479779
chr3	105050935-105051034
chr3	151130734-151130836
chr3	169555985-169556088
chr3	171235104-171235206
chr3	189217671-189217773
chr4	16174829-16174930
chr4	34437360-34437461
chr4	58622570-58622672
chr4	74533925-74534026
chr4	80396960-80397062
chr4	88234896-88234998
chr4	131836266-131836368
chr4	141179534-141179645
chr4	160710602-160710703
chr5	675149-675251
chr5	5043876-5043967
chr5	22384478-22384580
chr5	28469004-28469105
chr5	41618576-41618678
chr5	65701532-65701628
chr5	81552963-81553065
chr5	82426086-82426188
chr5	95978751-95978853
chr5	114495807-114495909
chr5	139689571-139689671
chr5	158776298-158776400
chr6	10757545-10757647
chr6	31051221-31051323
chr6	41004504-41004596
chr6	81943421-81943522
chr6	101044552-101044653
chr6	124206248-124206350
chr7	25298867-25298968
chr7	44863486-44863588
chr7	69809251-69809353
chr7	73400529-73400631
chr7	88036285-88036387
chr7	133952992-133953094
chr7	143444382-143444484
chr8	5184782-5184884
chr8	14333758-14333855
chr8	21741420-21741519
chr8	27070584-27070671
chr8	32338084-32338185
chr8	106681022-106681118
chr8	111426544-111426646
chr9	23833845-23833947
chr9	28430117-28430219
chr9	115166756-115166859
chr10	11357156-11357257
chr10	15218874-15218971
chr10	20021946-20022048
chr10	51754133-51754235
chr10	55153413-55153512
chr10	59756847-59756950
chr10	77438292-77438390
chr10	86761725-86761826
chr11	1587938-1588040
chr11	5296446-5296548
chr11	5695460-5695561
chr11	26025025-26025127
chr11	65024601-65024696
chr11	117713548-117713650
chr11	130221128-130221230
chr12	3134654-3134756
chr12	22867940-22868042
chr13	9072452-9072555
chr13	26167751-26167854
chr13	33243014-33243111
chr13	63370523-63370625
chr13	105721891-105721994
chr14	2447949-2448051
chr14	9473803-9473905
chr14	16535473-16535574
chr14	16536326-16536427
chr14	23981916-23982018
chr14	36730629-36730731
chr14	44456742-44456841
chr14	53230174-53230276
chr14	56684873-56684975
chr14	79395656-79395754
chr15	88378525-88378627
chr15	93296322-93296424
chr16	6215307-6215408
chr16	10487815-10487915
chr16	53573408-53573510
chr16	85074529-85074632
chr17	38259136-38259238
chr17	45821891-45821992
chr18	8498936-8499038
chr19	25765429-25765530
chr19	47049545-47049647
chr20	4971143-4971245
chr20	6198594-6198696
chr20	22018709-22018806
chr20	28655435-28655537
chr21	3980702-3980802
chr21	44070890-44070992
chr22	13511729-13511831
chr22	35803779-35803881
chr22	44663564-44663667
chr22	45156933-45157035
chrX	20319497-20319597
chrX	22229870-22229972
chrX	29693670-29693772
chrX	81521029-81521131
chrX	116262431-116262534
chrUn	2381-2483
chrRand	315588-315682
chrRand	12358-12459
chrRand	5543-5644
chrRand	751-854
chr1	122440689-122440791
chr1	154242911-154243013
chr5	24085950-24086052
chr5	110911213-110911315
chr7	45885960-45886062
chr7	61634871-61634971
chr8	14304794-14304896
chr10	48163689-48163792
chr10	83403846-83403948
chr12	33246483-33246585
chr13	34771524-34771618
chr16	43654914-43655033	X
chr17	5948342-5948444
chr2	170528943-170529045
chr3	39127131-39127233
chr3	118247124-118247226
chr4	58582258-58582359
chr5	73572363-73572465
chr6	15076224-15076326
chr7	30453110-30453211
chr10	107086249-107086350
chr15	73777131-73777232
chr15	75176264-75176366
chr16	51122114-51122216
chr19	35484395-35484497
chr21	10626885-10626987
chr22	11239481-11239583
chr1	132669887-132669987
chr1	165152990-165153089
chr1	175849686-175849788
chr2	347829-347931
chr2	158170322-158170424
chr2	190719984-190720085
chr3	60441950-60442052
chr5	3455400-3455502
chr5	37977379-37977482
chr5	65976239-65976347
chr6	62788080-62788180
chr9	123970285-123970385
chr11	71031027-71031142
chr12	40482032-40482129
chr12	80982207-80982307
chr12	113808494-113808594
chr13	32856778-32856880
chr13	54289713-54289816
chr14	21386505-21386607
chr14	60226820-60226922
chr15	33271601-33271702
chr15	76864704-76864806
chr16	40754564-40754666
chr18	40077619-40077721
chr19	25647272-25647373
chr22	46692466-46692566
chrUn	13625-13724
chr1	74374776-74374878
chr1	148274543-148274644
chr1	197019564-197019666
chr2	1289264-1289361
chr2	78202789-78202891
chr2	142112155-142112257
chr4	43148411-43148514
chr4	151942233-151942335
chr5	98917590-98917691
chr5	124414278-124414380
chr5	124416520-124416622
chr7	15746829-15746932
chr7	143444220-143444322
chr8	48558094-48558197
chr8	96377603-96377705
chr9	85698708-85698809
chr9	86192857-86192959
chr10	27754205-27754308
chr10	99751807-99751909
chr10	111697911-111698011
chr11	37015306-37015408
chr11	72965326-72965422
chr11	95694005-95694107
chr13	19143279-19143381
chr13	64309746-64309791
chr16	53618981-53619082
chr16	57770454-57770555
chr17	47414019-47414121
chr20	2584819-2584917
chr22	20345664-20345766
chrUn	2543-2645
chrRand	21752-21855
chr1	21108038-21108140
chr1	22408069-22408171
chr1	201922892-201922991
chr1	204913598-204913700
chr2	24253326-24253426
chr2	31641340-31641442
chr2	44501381-44501481
chr2	81721297-81721399
chr2	127970500-127970603
chr3	2911696-2911796
chr3	5295065-5295165
chr3	23825310-23825411
chr3	25989410-25989512
chr3	66848270-66848370
chr3	112139511-112139612
chr4	107388067-107388169
chr4	115885680-115885782
chr4	116163065-116163167
chr4	159673593-159673690
chr5	88387117-88387214
chr5	88674662-88674764
chr5	92467871-92467972
chr5	124926642-124926742
chr6	51846120-51846222
chr6	59002337-59002439
chr6	132314311-132314412
chr6	138131881-138131981
chr7	7672231-7672331
chr7	18417130-18417231
chr7	42316130-42316235
chr7	112584075-112584177
chr8	98041977-98042079
chr8	119896527-119896629
chr9	42153469-42153571
chr9	44949995-44950097
chr9	65980944-65981048
chr9	116802291-116802391
chr10	120552457-120552558
chr11	191574-191676
chr11	50636620-50636722
chr12	69876362-69876461
chr12	103006166-103006266
chr13	14745855-14745955
chr14	60546990-60547088
chr14	90212252-90212354
chr15	5010808-5010929
chr15	68364481-68364583
chr17	13271785-13271886
chr17	15918853-15918955
chr17	69734494-69734596
chr18	44757548-44757650
chr20	17639365-17639469
chr21	5078726-5078828
chr21	35824038-35824139
chr21	44944760-44944860
chr22	629313-629413
chr22	47552807-47552906
chrX	14830892-14830991
chrUn	23377-23479
chrRand	1994-2097
chrRand	9674-9777
chr1	87170799-87170900
chr1	95478637-95478739
chr1	134715704-134715806
chr2	32362743-32362851
chr3	12795656-12795758
chr3	47821028-47821130
chr4	8720017-8720120
chr5	89061625-89061726
chr5	129008061-129008163
chr6	132654475-132654577
chr7	55323244-55323343
chr7	69652195-69652294
chr7	80129091-80129192
chr8	95270093-95270195
chr9	35550340-35550442
chr9	68054143-68054253
chr11	2980217-2980319
chr11	19935773-19935875
chr11	67095663-67095766
chr11	89467659-89467761
chr11	108999482-108999584
chr11	122561323-122561425
chr12	75612164-75612266
chr12	81236569-81236671
chr15	8612695-8612809
chr16	38927249-38927351
chr18	7643706-7643798
chr18	14543285-14543388
chr22	19782771-19782873
chrX	40488480-40488577
chrX	64046522-64046624
chrX	66096492-66096592
chr1	1614772-1614875
chr1	14922334-14922436
chr1	65241212-65241314
chr2	937950-938051
chr2	1826168-1826270
chr2	18209197-18209296
chr2	170274673-170274774
chr2	198215668-198215769
chr2	198245702-198245803
chr3	20015753-20015853
chr3	32359572-32359674
chr3	143235082-143235184
chr4	16743478-16743577
chr4	85815186-85815287
chr4	106885573-106885674
chr4	151773914-151774016
chr5	2153184-2153282
chr5	94785208-94785310
chr5	100345123-100345225
chr6	59255086-59255189
chr6	78150327-78150429
chr6	88885728-88885831
chr6	95547068-95547169
chr7	18036066-18036168
chr7	27866158-27866260
chr7	28821646-28821748
chr7	62038263-62038365
chr7	69742421-69742523
chr8	107187065-107187168
chr9	35839905-35840007
chr9	66181728-66181830
chr9	104375262-104375364
chr10	12042703-12042805
chr10	88684187-88684288
chr10	129259904-129260003
chr11	110015995-110016098
chr12	173374-173477
chr12	107876301-107876403
chr12	112351874-112351976
chr13	26295972-26296073
chr13	36892055-36892157
chr13	46920282-46920384
chr14	68723423-68723526
chr15	1111925-1112027
chr15	22176597-22176699
chr15	34103052-34103151
chr15	87388206-87388308
chr15	96561489-96561592
chr16	15873182-15873285
chr17	8496681-8496780
chr17	53345010-53345112
chr18	21588405-21588507
chr18	40062692-40062794
chr19	37160912-37161011
chr19	47672845-47672946
chr20	7102743-7102832
chr21	43526348-43526450
chr22	20603560-20603662
chr22	43845448-43845548
chr22	44343173-44343273
chr22	45832199-45832300
chr22	45848921-45849020
chrX	76266500-76266599
chrUn	307-409
chrUn	729-830
chrRand	887-989
chr1	34913753-34913853
chr1	194680802-194680903
chr2	17653890-17653992
chr5	119608814-119608916
chr5	149715753-149715855
chr6	61745183-61745283
chr7	79803553-79803655
chr9	121763425-121763526
chr10	49605675-49605777
chr11	83753725-83753826
chr11	130014717-130014819
chr13	42528145-42528246
chr17	34624028-34624131
chr19	18329492-18329595
chr21	48361045-48361148
chr22	45830988-45831085
chrRand	885-988
chr1	185372313-185372415
chr2	41343400-41343502
chr3	90179945-90180046
chr4	6579683-6579727
chr5	158561705-158561807
chr6	85172769-85172871
chr6	142155258-142155358
chr7	70698633-70698738
chr7	152821918-152822017
chr8	100625539-100625641
chr9	46222220-46222321
chr11	7884651-7884753
chr11	38348761-38348863
chr11	84821360-84821461
chr12	67900926-67901026
chr13	58776889-58776991
chr14	60839273-60839370
chr14	61220653-61220755
chr20	21598241-21598344
chr20	32124082-32124184
chr22	44084175-44084277
chr22	46206741-46206842
chrUn	1094785-1094887
chrRand	1886-1988
chrRand	17514-17618
chr1	191725444-191725545
chr2	15420687-15420789
chr2	135973345-135973446
chr2	188908444-188908536
chr3	109997798-109997900
chr3	139597620-139597723
chr4	167368382-167368484
chr5	4146359-4146460
chr5	130775897-130776000
chr5	158277079-158277181
chr7	141040542-141040638
chr7	154465529-154465631
chr7	155176664-155176765
chr8	6057036-6057138
chr8	49682447-49682549
chr8	119848392-119848494
chr8	125463821-125463921
chr9	27450535-27450637
chr9	32967763-32967865
chr10	8257039-8257141
chr10	61760381-61760483
chr11	9725340-9725443
chr11	15695985-15696087
chr11	86923390-86923490
chr13	115187260-115187362
chr15	48343612-48343712
chr15	83303356-83303458
chr15	85368156-85368258
chr16	19941451-19941553
chr18	13884146-13884248
chr19	17664915-17665018
chr19	41827639-41827741
chr20	1264985-1265087
chr21	3488626-3488728
chrUn	15419-15520
chrUn	5396-5498
chrUn	3487-3589
chr1	161497612-161497715
chr2	68940405-68940505
chr2	121721267-121721370
chr2	176169492-176169594
chr3	5917413-5917514
chr3	104618036-104618137
chr3	111748953-111749055
chr3	145248084-145248185
chr4	156841017-156841119
chr5	24338179-24338281
chr5	86133647-86133747
chr7	31320016-31320118
chr7	73478890-73478978
chr8	118335252-118335354
chr9	117119875-117119977
chr9	117122881-117122983
chr10	49220343-49220445
chr11	57008152-57008254
chr11	69067877-69067979
chr13	28015340-28015442
chr13	83847978-83848078
chr16	41753867-41753969
chr16	66901039-66901141
chr18	4647465-4647567
chr18	45018991-45019094
chr18	45021999-45022102
chr21	15419261-15419363
chr21	32984140-32984243
chrX	63519695-63519797
chrX	129411704-129411806
chr1	13477937-13478039
chr1	43422091-43422193
chr1	100857253-100857356
chr1	128772700-128772802
chr1	136575406-136575509
chr1	162142813-162142915
chr1	162145145-162145248
chr1	197956654-197956756
chr2	20262476-20262578
chr2	24293072-24293174
chr2	42757866-42757969
chr2	149360719-149360821
chr3	1653108-1653210
chr3	16741014-16741114
chr3	111392690-111392793
chr4	22026037-22026139
chr4	80848109-80848211
chr5	651853-651954
chr5	68253084-68253183
chr5	84317125-84317227
chr5	102365177-102365280
chr5	139289994-139290097
chr6	16101438-16101540
chr6	21367261-21367363
chr6	44462940-44463042
chr6	144971553-144971656
chr6	146083248-146083350
chr6	152015056-152015158
chr7	67886869-67886971
chr7	81137999-81138020
chr7	146307706-146307809
chr8	27958197-27958299
chr8	41816223-41816325
chr8	71488176-71488278
chr8	76098751-76098853
chr8	98432734-98432836
chr8	102609336-102609438
chr8	114541800-114541902
chr8	116887487-116887590
chr9	42350382-42350476
chr9	108785610-108785712
chr10	12988384-12988486
chr10	17508918-17509021
chr10	18173578-18173680
chr10	43496271-43496373
chr10	53591233-53591335
chr10	62914820-62914920
chr11	6284208-6284310
chr11	83443568-83443669
chr12	13855293-13855394
chr12	37277792-37277893
chr12	51218489-51218590
chr12	70216030-70216133
chr12	81499548-81499649
chr12	106091167-106091269
chr12	114374630-114374733
chr13	4539062-4539161
chr13	32196883-32196986
chr13	48973539-48973642
chr13	73200759-73200862
chr13	109142272-109142374
chr13	114721539-114721641
chr13	115003258-115003361
chr14	15201097-15201198
chr14	49185828-49185930
chr14	50388893-50388993
chr14	90373075-90373177
chr15	35650283-35650385
chr15	72225037-72225139
chr16	92221615-92221718
chr16	93895392-93895494
chr17	6768971-6769072
chr17	47594071-47594173
chr18	4877491-4877593
chr18	16135229-16135330
chr18	19822014-19822117
chr18	40103903-40104005
chr18	41892013-41892111
chr18	42539686-42539788
chr19	42227794-42227896
chr19	43992837-43992939
chr21	1122722-1122823
chr21	4144484-4144586
chr21	27428042-27428144
chr21	32962957-32963060
chr22	16894566-16894669
chr22	48995066-48995168
chrX	5412168-5412271
chrX	23149028-23149129
chrX	31136338-31136440
chrX	83113164-83113266
chrX	120418208-120418310
chrX	131041101-131041204
chrX	135018339-135018441
chrUn	712-733
chrUn	19888-19990
chrUn	6149-6251
chr1	11585975-11586077
chr1	54270807-54270909
chr1	120400180-120400282
chr2	21210048-21210150
chr2	54705412-54705515
chr2	85928907-85929008
chr2	117648447-117648550
chr2	165515893-165515995
chr2	166882495-166882598
chr2	177452383-177452486
chr3	104499917-104500020
chr3	128605967-128606069
chr4	110136720-110136822
chr5	104687795-104687896
chr6	28585025-28585127
chr6	41758305-41758407
chr7	24420329-24420431
chr7	100745470-100745572
chr8	38549077-38549179
chr8	42000861-42000963
chr8	49567874-49567984
chr8	95939099-95939201
[truncated: 277 more rows]

## Sheet: Suppl_Table_S4
human [hg19]	MARM	TSD	A-tail (including As in TSD)	length A-tail	Endonuclease cleavage site
Supplemental Table S4. Putatitve full-length Platy-1 insertions in human genome.s
chr11:117044237-117044338	ABSENT	AAAAAGTTCTACAGT	AAAGAAAAAGAAAAAAGAAAAAAAAA	26	TTTTGA
chr6:79013345-79013445	ABSENT	AAAAGCTTCA	AAAA	4	TTTTAA
chr6:7073787-7073888	SHARED	AAAg/cATGCTATGTC	AAAAAAACAACAAAAAAACCAAAAACAAAAAAA	33	g/cTTTCG
chr16:87434321-87434423	FLANKING NO MATCH	AAAGTAAATGCa/cTGTGTTTT	AAAAAAAAAAAAAAA	15	CTTTCA
chr2:167321135-167321238	ABSENT	AAg/aGATAg/cGCTGAT	AAAAAAAAATTAAAAA	16	CTTTAA
chr3:181060687-181060792	ABSENT	AAGAATATATACTTT	AAAAAAAAAAAAAA	14	TCTTAA
chr4:24708415-24708515	SHARED	AAGATTATTGA	AAATAAATAAATAAATAA	18	TCTTGG
chr13:31635298-31635404	SHARED	AGAAGAAAGACTTTA	AATAAAAAAAAAAAAAAAAAA	21	TCTTAT
chr13:42992824-42992926	ABSENT	Ga/-AAACTt/-GAATg/aGA	AAAAAAA	7	TTTCAC
chr13:28514630-28514733	ABSENT	TAAAATGTACTGAGT	AAAAAAATAATAATAA	16	TTTAAG
chr19:4813595-4813698	UNCLEAR, PARTIAL PLATY-1 match	insertion into polyA polyA	n.a.	n.a.	n.a.
chr1:19303511-19303624	ABSENT	insertion into polyA	n.a.	n.a.	n.a.
chr16:74696055-74696158	SHARED	no TSD	n.a.	n.a.	n.a.
small letters separated by / indicate mutation within TSDs.
human [hg19]	MARM	TSD
chr4:63068539-63068641	FLANKING NO MATCH	no TSD
chr6:132312390-132312504	ABSENT	no TSD
chr3:45729306-45729410	SHARED	no TSD
chr7:4795101-4795213	ABSENT	no TSD
chr15:79175136-79175245	SHARED	no TSD
chr20:45727900-45728011	partially absent?	no TSD
chr8:29189452-29189562	flanking matches only partially	no TSD
chr18:19142171-19142279	SHARED	no TSD
chr2:231994743-231994839	ABSENT, EXTENDS ELEMENT	no TSD
chr7:131061003-131061106	flanking matches only partially	no TSD
chr12:69880835-69880934	SHARED	no TSD
chr5:37356853-37356945	SHARED	no TSD
chr10:34731393-34731498	ABSENT	AAGAAAATAt/cAGGCA
chr22:42809648-42809750	FLANKING NO MATCH	within polyA, likely not insertion

## Sheet: Supplemental_Table_S5
Supplemental Table S5. Putative full-length Platy-1 insertions in rhesus macaque genome.
rhesus macaque (rheMac3)	human (hg19)	sequence present in human
Platy-1-1:chr4:7025421-7025525:104:	hg19:chr6:7073258-7074398::+	yes
Platy-1-1:chr5:36104116-36104225:109:*	hg19:chr4:40730516-40731721::+	yes
Platy-1-1:chr11:66862690-66862787:97:	hg19:chr12:69880340-69881435::-	yes
Platy-1-1:chr2:100483437-100483533:96:	hg19:chr3:37529116-37530200::-	yes
Platy-1-1:chr13:134097319-134097415:96:	hg19:chr2:129217958-129218944::+	yes
Platy-1-1:chr9:100093311-100093407:96:	hg19:chr10:104530679-104532032::+	yes
Platy-1-1:chr9:126602255-126602351:96:	hg19:chr10:131007834-131008963::-	yes
Platy-1-1:chr17:7687362-7687465:103:	hg19:chr13:28514129-28515241::+	yes
Platy-1-1:chr9:94718817-94718921:104:*	hg19:chr10:99334772-99335866::+	yes
Platy-1-1:chr15:96472527-96472623:96:	hg19:chr9:89623502-89624591::+	yes
Platy-1-1:chr19:4782267-4782369:102:	hg19:chr19:4813051-4813797::-	yes
Platy-1-1:chr7:19771820-19771916:96:	hg19:chr15:42747284-42748381::-	yes
Platy-1-1:chr6:12256765-12256861:96:	hg19:chr5:12213696-12214816::+	yes
Platy-1-1:chr3:164091038-164091134:96:*	hg19:chr7:124692728-124693776::-	yes
Platy-1-1:chr20:72817226-72817322:96:	hg19:chr16:74695408-74696647::-	yes
Platy-1-1:chr15:104257765-104257867:102:*	hg19:chr10:65036798-65037445::-	?, partial match
Platy-1-1:chr4:42605277-42605374:97:*	hg19:chr6:42098506-42099279::-	likely yes, Ns in rhesus
Platy-1-1:chr14:107643248-107643343:95:	hg19:chr11:106401814-106403208::-	yes
Platy-1-1:chr19:52728978-52729086:108:*	hg19:chr19:47210071-47211199::+	yes
Platy-1-1:chr2:177413800-177413896:96:	hg19:chr3:32594919-32596004::+	yes
Platy-1-1:chr13:37508080-37508170:90:*	hg19:chr1:200590164-200591256::-	yes
Platy-1-1:chr15:84205775-84205871:96:	hg19:chr9:77125933-77127025::+	yes
Platy-1-1:chr3:150795460-150795555:95:	hg19:chr7:111585927-111587031::+	yes
Platy-1-1:chr17:10612278-10612381:103:	hg19:chr13:31634804-31635910::+	yes
Platy-1-1:chr3:170352998-170353112:114:*	hg19:chr7:131060467-131061748::+	yes
Platy-1-1:chr5:19827051-19827153:102:	hg19:chr4:24707983-24709017::-	yes
Platy-1-1:chr11:114827797-114827894:97:	hg19:chr12:113472867-113473985::+	yes
Platy-1-1:chr1:130367850-130367939:89:*	hg19:chr1:151389998-151391008::+	yes
Platy-1-1:chr2:74169261-74169358:97:	hg19:chr3:63423554-63424649::-	yes
Platy-1-1:chr4:150136293-150136390:97:	hg19:chr6:116344345-116346279::+	yes
Platy-1-1:chr17:80967196-80967292:96:	hg19:chr13:101048304-101049402::+	yes
Platy-1-1:chr6:175943467-175943563:96:	hg19:chr5:176615218-176616298::-	yes
Platy-1-1:chr12:60996262-60996358:96:	no match in human	?
Platy-1-2:chr1:21755802-21755912:110:*	hg19:chr1:19303020-19304098:	yes
Platy-1-2a:chrX:46178457-46178588:131:*	no match in human
Platy-1-2b:chr12:29779583-29779686:103:	hg19:chr2:167320520-167321637::-	yes
Platy-1-2b:chr4:76327177-76327278:101:	hg19:chr6:79013063-79014108::+	yes
Platy-1-2b:chr2:113475240-113475346:106:	hg19:chr3:175353918-175354995::+	yes
Platy-1-2b:chr3:170167291-170167387:96:*	hg19:chr7:130886687-130887793::-	yes
Platy-1-2b:chr9:34596002-34596108:106:*	hg19:chr10:34730891-34731974::+	yes
Platy-1-2b:chr20:85687732-85687833:101:	hg19:chr16:87433848-87435236::-	yes
Platy-1-2b:chr3:49396544-49396660:116:*	hg19:chr7:101388855-101389954::-	yes
Platy-1-2b:chr14:118110036-118110128:92:	hg19:chr11:117043731-117044834::-	yes
Platy-1-2b:chr17:21577736-21577838:102:	hg19:chr13:42992359-42993418::+	yes
Platy-1-2b:chr8:30547810-30547915:105:*	hg19:chr8:30140899-30142009::-	yes
Platy-1-2b:chr20:48088494-48088599:105:	hg19:chr16:49878830-49879964::-	yes
Platy-1-3:chr13:61505106-61505223:117:	hg19:chr2:61699264-61700607::-	yes
Platy-1-4a:chr19:56607037-56607142:105:	hg19:chr19:51111481-51112525::+	yes
Platy-1-5:chr1:30327702-30327823:121:*	hg19:chr1:27788511-27789549::-	yes
Several of the loci in the file have an asterisk indicating a partial second match. Most of these loci are likely derived from other repeats and do not represent true Platy-1 insertions. Given the almost 100% overlap with human, we did not further investigate these putatitive Platy-1 loci.

## Sheet: Suppl_Table_S6
Supplemental Table S6. Phylogenetic information of Platy-1 loci
	Species
Id Number	TLE	HeLa	Chimp	Green Monkey	Woolly Monkey	Spider Monkey	RHM	calJac	Pygmy marm	Tamarin	Cebus	Squirrel Monkey	Owl Monkey	Saki	Titi	Annealing Temperature	Sum	included
0164chr3	?	0	0	0	0	0	0	1	?	0	0	0	0	0	0	50	?	n
0211chr7	?	0	0	0	0	?	0	1	?	0	?	0	0	0	0	57	?	n
0314chr5	?	0	0	?	?	?	0	1	1	?	?	0	?	?	?	57	?	n
0366chr16	?	0	0	0	0	0	0	1	1	0	0	?	0	?	?	57	marm	y
0369chr1	?	0	0	0	0	0	0	1	0	0	0	0	0	0	0	50	cM	y
0560chr10	?	0	?	0	0	0	0	1	1	0	0	0	0	?	0	50	marm	y
0695chr13	?	0	0	0	0	0	0	1	1	1	1	1	1	0	0	50	Ceb	y
0953chr1	?	0	0	0	0	0	0	1	0	0	0	0	0	0	0	57	cM	y
1301chr11	?	0	0	0	0	0	0	1	1	1	0	0	0	?	0	57	Call	y
1324chr6	?	0	0	0	?	?	?	1	1	1	?	0	0	0	?	57	?	n
1426chr9a	?	0	0	0	?	?	0	1	1	0	0	0	0	0	0	54	marm	y
1455chr20	?	0	0	0	0	0	0	1	0	0	0	?	0	0	0	57	cM	y
1902chr11	?	0	0	0	0	0	0	1	0	?	0	0	0	0	0	50	cM	y
2102chr21	?	0	0	?	?	0	0	1	0	0	?	0	?	0	0	57	cM	y
2178chr7	?	0	0	?	0	0	0	1	1	0	0	0	0	0	0	57	marm	y
2267chr12	?	0	0	0	0	0	0	1	1	1	0	0	0	0	?	57	Call	y
2500chr5	?	0	0	0	0	0	0	1	1	0	0	0	0	0	0	57	marm	y
2792chr2	?	?	?	0	0	?	0	1	0	?	?	0	0	0	?	54	cM	y
3271chr6	?	0	0	?	0	0	?	1	1	0	0	0	0	0	0	50	marm	y
3767chr14	?	0	0	0	0	0	0	1	0	0	0	0	0	0	0	50	cM	y
3896chr3a	?	0	0	0	?	?	?	0/1	0	0	?	0	?	0	?	50	cM	n
4494chr15	?	0	0	0	0	0	0	1	0	0	0	0	0	?	0	57	cM	y
4743chr6	?	0	0	0	0	0	0	1	0	0	?	0	0	0	0	50	cM	y
5147chr15	?	0	0	0	0	0	0	1	0	0	0	0	0	?	0	57	cM	y
5226chr5	?	0	0	0	0	0	0	1	1	0	0	0	0	0	0	57	marm	y
5456chr22	?	0	0	?	0	0	0	1	0	0	0	0	0	0	?	57	cM	y
5538chr5	?	0	0	?	?	0	0	1	1	1	0	0	0	?	?	50	Call	y
5703chr4	?	0	0	0	?	?	?	1	1	0	0	0	0	0	0	57	marm	y
5778chr8	?	0	0	?	?	?	?	1	0	0	0	0	0	0	0	50	cM	y
6246chr14	?	0	0	0	0	0	0	0	0	0	0	?	0	0	0	50	fp?	y
6265chr18	?	0	0	0	?	1	1	1	1	1	1	1	1	1	1	57	NWM	y
6340chr15	?	0	?	0	0	0	0	1	1	0	0	0	0	0	0	50	marm	y
6413chr2	?	0	0	?	0	0	0	1	1	0	0	0	0	0	0	57	marm	y
6584chr10	?	0	0	0	0	?	?	1	1	?	0	0	0	0	0	57	?	n
6764chr11	?	0	0	0	0	0	0	1	0	0	0	0	0	0	0	50	cM	y
6791chr8a	?	0	0	0	1	1	1	1	1	1	1	1	1	1	1	57	NWM	y
6806chr5	?	0	0	0	0	0	0	1	1	?	0	0	0	0	?	57	?	n
7055chr3a	?	0	0	0	0	0	0	1	1	0	?	0	0	0	0	57	marm	y
7092chr3	?	0	0	0	0	0	0	1	1	0	0	?	?	0	?	57	marm	y
7232chr15	?	0	0	?	?	?	0	1	1	1	0	0	?	0	0	57	Call	y
7256chr14	?	?	0	0	0	0	0	1	1	0	?	0	0	0	0	50	marm	y
7612chr10	?	0	0	0	?	0	0	1	0	0	0	?	0	0	0	57	cM	y
7656chr16	?	0	0	0	0	0	0	1	1	0	?	?	0	0	?	57	marm	y
7790chr2	?	0	0	0	?	?	?	1	1	0	0	0	0	0	0	57	marm	y
8302chr1	?	0	0	0	0	0	0	1	0	0	0	0	0	?	0	50	cM	y
8373chr3	?	0	?	0	1	1	1	1	1	1	?	1	1	1	1	48	NWM	y
8431chr5	?	?	0	0	?	0	?	1	1	upper	0	?	0	?	?	57	?	n
8524chr3	?	0	0	0	0	0	0	1	0	0	0	0	0	0	?	57	cM	y
8736chr16	?	0	0	0	0	0	0	1	1	?	0	0	0	0	0	57	?	n
8914chr6	?	0	0	0	?	0	0	1	?	?	?	?	?	?	?	57	?	n
9159chr7	?	0	0	?	0	0	0	1	0	0	0	?	0	0	0	57	cM	y
9230chr19	?	0	0	0	0	0	?	1	1	0	0	?	?	0	?	57	marm	y
9307chr2	?	0	0	?	1	1	1	1	1	1	1	1	1	1	1	50	NWM	y
9310chr1	?	0	0	?	0	0	0	1	0	0	0	0	0	0	0	50	cM	y
locus 10	?	0	0	0	0	0	0	1	1	0	0	0	0	?	0	57	marm	y
locus 100	?	0	0	0	0	0	0	1	?	0	0	?	?	0	?	57	?	n
locus 102	?	0	0	?	0	0	0	1	1	0	0	0	0	0	0	57	marm	y
locus 104	?	0	0	?	0	0	0	1	1	0	0	?	0	?	0	50	marm	y
locus 106b	?	0	0	0	0	0	0	1	1	0	0	0	0	0	0	57	marm	y
locus 108	?	0	0	0	0	?	?	1	1	?	0	?	0	0	0	57	?	n
locus 110	?	?	?	?	0	0	0	1	1	0	?	0	?	0	?	57	marm	y
locus 112	?	0	0	0	0	0	0	1	1	0	0	0	0	0	0	50	marm	y
locus 116	?	0	0	?	?	0	?	1	1	?	?	0	0	?	0	57	?	n
locus 118	?	0	0	0	0	0	0	1	1	0	0	0	?	0	0	50	marm	y
locus 12	?	?	?	?	0	0	0	1	1	0	0	?	0	0	0	57	marm	y
locus 120	?	0	0	0	0	0	0	1	1	0	0	0	0	?	?	50	marm	y
locus 122	?	0	0	0	?	?	0	1	1	0	0	?	?	0	?	50	marm	n
locus 124	?	0	0	0	0	0	0	0/1	0/1	0	?	?	0	0	0	57	marm	y
locus 126	?	0	0	0	0	0	0	0/1	0	0	0	0	0	0	0	50	cM	y
locus 128b	?	?	0	0	0	?	0	1	1	0	?	0	0	?	?	50	marm	y
locus 132b	?	0	0	0	0	0	0	1	1	0	0	0	0	0	?	46	marm	y
locus 134	?	0	0	0	0	0	0	0/1	0/1	0	0	0	0	0	0	57	marm	y
locus 136	?	0	0	0	0	?	0	1	1	0	?	0	0	?	0	57	marm	y
locus 138	?	0	0	0	0	0	0	1	1	0	0	0	0	?	?	57	marm	y
locus 140	?	0	0	0	0	0	0	1	1	0	0	0	0	?	?	50	marm	y
locus 142	?	0	0	0	0	0	0	0/1	0/1	0	0	0	0	0	0	46	marm	y
locus 146	?	0	0	?	0	0	?	0	0	0	0	0	0	0	0	57	fp	y
locus 14c	?	0	0	0	0	0	0	1	1	0	0	0	0	0	0	50	marm	y
locus 150	?	0	0	0	0	0	0	1	1	0	0	0	0	?	0	44	marm	y
locus 152	?	0	0	0	0	0	0	1	1	0	0	0	0	?	0	57	marm	y
locus 153	?	0	0	0	0	0	0	1	1	0	0	0	0	0	0	57	marm	y
locus 154	?	0	0	0	0	?	0	1	1	0	?	0	0	?	0	50	marm	y
locus 155	?	0	0	0	0	0	0	1	1	?	0	0	0	0	?	57	?	n
locus 156	?	0	0	0	?	0	0	1	1	0	?	?	0	0	0	46	marm	y
locus 157	?	0	0	?	0	0	0	1	1	0	0	?	0	0	0	57	marm	y
locus 157_1	?	0	0	?	1	1	1	0	0	0	0	?	0	0	0	57	n.a.	n.a.	near parallel insertion
locus 160a	?	0	0	0	?	?	?	1	0	0	0	0	0	?	0	57	cM	y
locus 162	?	?	?	?	?	?	?	1	1	?	?	?	?	?	?	57	?	n
locus 164	?	0	0	0	0	0	0	1	1	0	0	0	0	?	0	57	marm	y
locus 166	?	0	0	0	0	0	0	0/1	0/1	0	0	0	0	0	0	52	marm	y
locus 168	?	0	0	0	0	0	0	1	1	0	0	0	0	?	?	50	marm	y
locus 16b	?	0	0	?	?	0	0	1	1	0	0	0	?	0	0	50	marm	y
locus 172	?	?	?	0	0	0	0	1	0	0	?	0	0	0	?	57	cM	y
locus 174c	?	0	0	?	0	0	0	1	1	0	0	0	0	0	0	50	marm	y
locus 176	?	0	0	0	?	0	0	1	1	0	0	0	0	0	?	57	marm	y
locus 178	?	0	0	0	0	0	0	1	1	0	0	?	0	0	0	50	marm	y
locus 18	?	0	0	upper	?	0	?	1	1	0	?	?	?	0	0	57	marm	n
locus 181	?	0	0	0	0	0	0	1	1	0	0	0	0	0	?	57	marm	y
locus 182	?	0	0	0	0	0	0	1	1	0	0	0	0	0	0	57	marm	y
locus 183	?	0	0	0	0	0	0	1	?	0	0	0	0	0	?	46	?	n
locus 184b	?	0	0	0	0	0	0	1	1	0	0	0	0	0	0	50	marm	y
locus 186	?	0	0	0	0	0	0	1	1	0	0	0	0	0	0	52	marm	y
locus 188b	?	0	0	?	0	0	0	1	0	0	0	0	0	0	0	57	cM	y
locus 190	?	0	0	0	0	0	?	1	1	0	?	?	0	?	?	50	marm	n
locus 192	?	0	0	0	0	0	0	0/1	0	0	0	0	0	0	0	50	cM	y
locus 194	?	0	0	0	0	0	0	1	1	0	0	0	0	0	0	50	marm	y
locus 196	?	0	0	0	0	0	0	1	0	0	0	?	0	0	0	57	cM	y
locus 198	?	0	0	0	0	0	0	1	1	0	0	0	0	0	0	57	marm	y
locus 2	?	0	0	?	0	0	0	1	1	0	0	0	0	0	0	57	marm	y
locus 200	?	0	0	0	0	0	0	1	1	0	0	0	0	0	0	57	marm	y
locus 201	?	0	0	0	0	0	0	1	1	0	0	0	0	0	0	57	marm	y
locus 202	?	0	0	?	?	0	0	1	1	0	0	0	0	?	0	57	marm	y
locus 22	?	0	0	0	0	0	0	0/1	0/1	0	0	0	0	0	0	57	marm	y
locus 24	?	0	0	?	?	?	?	1	1	0	0	?	0	0	0	50	marm	n
locus 26	?	?	?	?	0	0	0	1	1	0	0	0	0	0	0	57	marm	y
locus 28b	?	0	0	0	0	0	0	1	1	0	?	0	0	0	0	57	marm	y
locus 30b	?	0	0	0	0	0	0	1	1	0	0	?	0	0	0	50	marm	y
locus 32b	?	?	?	?	?	?	?	1	1	0	?	?	?	?	?	57	marm	n
locus 34	?	0	0	0	0	0	0	1	1	0	0	0	0	0	0	57	marm	y
locus 36	?	0	0	0	0	0	0	1	1	0	0	0	0	0	0	57	marm	y
locus 38	?	0	0	0	0	0	0	1	1	0	0	0	0	?	?	57	marm	y
locus 4	?	0	0	0	0	0	0	1	1	0	0	0	0	?	?	50	marm	y
locus 42	?	0	0	?	0	0	0	1	1	0	0	0	0	0	0	57	marm	y
locus 44b	?	0	0	0/ upper	0	?	?	1	1	0	?	?	0	?	?	57	marm	n
locus 46	?	0	0	0	?	0	?	0/1	1	?	0	?	upper	0	0	50	?	n
locus 48	?	0	0	0	0	?	0	1	1	0	?	0	0	0	0	50	marm	y
locus 50	?	0	0	0	0	0	0	1	1	0	0	0	0	0	0	50	marm	y
locus 52c	?	0	0	0	0	0	0	1	1	0	0	0	0	?	?	50	marm	y
locus 54	?	0	0	0	?	0	0	1	1	0	0	0	0	?	?	57	marm	y
locus 56	?	0	0	0	0	0	0	1	1	0	0	0	0	0	0	57	marm	y
locus 58	?	0	0	?	0	0	0	1	1	?	0	0	0	0	0	50	?	n
locus 6	?	0	0	0	0	0	0	1	1	0	0	0	0	0	0	57	marm	y
locus 60c	?	0	0	0	?	0	?	1	1	0	0	0	0	?	?	57	marm	y
locus 62	?	0	0	0	0	0	0	1	1	0	0	0	0	0	0	57	marm	y
locus 64	?	0	0	0	0	0	0	1	1	0	0	0	?	0	0	57	marm	y
locus 66	?	0	0	0	0	0	0	1	1	0	0	0	0	?	?	57	marm	y
locus 68	?	0	0	0	0	0	0	1	?	?	0	0	0	0	0	57	?	n
locus 70	?	0	0	0	?	?	0	1	1	0	0	0	0	0	0	57	marm	y
locus 72	?	0	0	?	0	0	0	1	1	0	0	0	0	?	0	50	marm	y
locus 74b	?	0	0	0	0	0	0	1	1	0	0	0	0	?	?	53	marm	y
locus 76	?	0	0	0	?	?	?	1	1	0	?	?	0	?	?	50	marm	n
locus 78	?	0	0	0	0	?	0	1	1	?	?	?	0	?	?	57	?	n
locus 80	?	?	?	?	0	?	0	1	1	0	?	?	0	?	?	57	marm	n
locus 82	?	0	0	0	0	0	0	1	1	0	0	0	?	?	0	57	marm	y
locus 84	?	0	0	0	0	0	0	1	1	0	0	0	0	?	0	57	marm	y
locus 86	?	0	0	0	0	0	0	1	1	0	0	0	0	?	0	57	marm	y
locus 8c	?	0	0	0	?	0	0	1	1	0	0	?	0	0	0	50	marm	y
locus 90	?	0	0	0	0	0	0	1	1	0	0	0	0	0	0	57	marm	y
locus 92	?	0	0	0	0	?	0	1	1	?	0	?	0	0	0	57	?	n
locus 94	?	0	?	0	0	0	0	1	1	?	0	0	0	0	0	50	?	n
locus 98	?	0	0	0	0	0	0	1	1	0	0	0	0	?	0	50	marm	y
k1089	?	0	0	0	0	0	0	1	1	?	0	0	0	0	0	58	?	n
k1128	?	0	0	?	0	0	?	1	1	?	0	?	0	0	0	57	?	n
k1260	?	0	0	0	0	?	?	1	1	?	?	0	?	0	?	57	?	n
k1303	?	0	0	?	0	0	?	1	1	1	?	0	0	0	0	57	Call	y
k1780	?	0	0	?	0	0	0	1	1	?	0	0	0	?	0	54	?	n
k1841	?	0	0	?	0	0	?	1	1	upper	0	0	0	0	0	54	?	n
k1938(2)	?	1	1	1	?	0	0	1	1	?	0	?	?	?	0	57	?	n
k1982(2)B	?	0	0	0	0	?	?	1	1	1	?	?	0	0	0	54	Call	y
k1994(2)G	?	0	0	0	?	?	?	1	1	0	?	0	0	0	0	54	marm	y
k2158(2)	?	0	0	0	0	?	0	1	1	?	0	0	0	0	0	60	?	n
k3285(2)_mk	?	0	0	0	0	0	0	1	1	?	0	0	0	?	?	57	?	n
k3430	?	0	0	upper	0	?	?	1	1	?	?	?	0	0	0	57	?	n
k4075	?	0	0	?	0	0	0	1	1	?	0	0	0	?	0	57	?	n
k4094	?	0	0	?	0	0	0	1	1	?	0	?	?	?	0	57	?	n
k4254 (2)	?	0	0	0	0	0	0	1	1	?	0	0	0	?	0	57	?	n
k4407	?	0	0	0	?	0	?	1	?	?	?	?	0	?	?	52.1	?	n
k4983	?	0	0	0	0	0	0	1	1	1	?	0	?	?	?	57	?	n
k5063	?	0	0	?	0	0	0	1	1	?	0	0	0	?	0	57	?	n
k6417	?	0	0	0	?	0	0	1	1	?	0	0	0	?	0	58.3	?	n
k6872	?	0	0	0	0	0	0	1	1	?	0	0	?	0	0	57	?	n
k7172	?	0	0	0	0	?	0	1	1	?	0	?	0	?	0	58.3	?	n
k7253	?	0	0	0	0	0	?	1	1	?	0	0	0	?	0	57	?	n
k8155	?	0	0	0	0	0	0	1	1	?	?	0	0	?	0	57	?	n
k8242	?	0	0	0	0	0	0	1	1	?	0	0	0	0	?	57	?	n
k8517	?	0	0	?	?	?	0	1	1	?	0	0	0	0	0	57	?	n
k8885(2)	?	0	0	0	1	1	1	1	1	1	1	1	1	?	?	60	?	n
k9062	?	0	0	0	0	0	0	1	1	?	0	0	0	?	0	57	?	n
k9310	?	0	0	?	0	0	?	1	1	?	0	0	0	0	0	57	?	n
k9372	?	?	?	?	?	?	0	1	?	?	0	0	0	?	0	58.3	?	n
k9467	?	0	0	0	?	?	?	?	?	?	?	1	?	?	?	50	?	n
nE25_merged	?	0	0	0	0	0	0	1	1	?	0	0	0	0	0	57	?	n
k1212(2)F	?	0	0	0	0	?	?	1	1	0	0	0	?	?	?	57	marm	n
k1070	?	0	0	0	0	0	0	1	1	1	0	0	0	0	0	57	Call	y
k1138	?	0	0	0	0	0	0	1	1	1	0	0	0	0	?	57	Call	y
k1162	?	0	0	0	0	0	0	1	1	1	0	0	0	0	0	60	Call	y
k1326	?	0	0	0	?	0	0	1	1	1	0	0	0	0	0	57	Call	y
k1339(2)B	?	0	0	?	0	0	0	1	1	1	0	0	0	0	0	57	Call	y
k1358	?	0	0	0	0	0	?	1	1	1	0	0	0	0	0	60	Call	y
k1381-merged	?	0	0	0	0	0	0	1	1	1	0	0	0	?	0	57	Call	y
k1993	?	0	0	0	0	0	0	1	1	1	0	0	0	0	0	57	Call	y
k2077	?	0	0	?	0	0	0	1	1	1	0	0	0	?	0	57	Call	y
k2453(2)	?	0	0	0	0	0	0	1	1	1	0	0	0	0	0	57	Call	y
k2939(2)	?	0	0	0	0	0	0	1	1	1	0	0	?	0	?	58	Call	y
k2980(2)	?	0	0	0	0	0	0	1	1	1	0	0	0	0	0	52	Call	y
k3332	?	0	0	0	0	0	0	1	1	1	0	0	?	0	0	57	Call	y
k3825	?	0	0	0	0	0	0	1	1	1	0	0	0	0	0	60	Call	y
k4048	?	0	0	0	0	0	0	1	1	1	0	0	?	0	0	57	Call	y
k4971(2)	?	0	0	0	?	0	0	1	1	1	0	0	0	0	0	54	Call	y
k5436	?	0	0	0	0	0	?	1	1	1	0	0	0	0	0	57	Call	y
k5858	?	0	0	0	0	0	0	1	1	1	0	0	0	?	?	58	Call	y
k7820	?	0	0	0	0	0	0	1	1	1	0	0	0	?	0	57	Call	y
k8123	?	0	0	0	?	0	0	1	1	1	0	0	0	?	0	60	Call	y
k8647	?	0	0	?	0	0	0	1	1	1	0	0	0	0	0	57	Call	y
k9473	?	0	0	0	0	0	0	1	1	1	0	0	?	0	0	57	Call	y
k9554	?	0	0	0	0	0	0	1	1	1	0	0	0	0	0	57	Call	y
k1474	?	0	?	?	?	?	0	1	1	1	0	0	0	?	?	52	Call	y
k1054	?	0	0	0	0	0	0	1	0	0	0	0	0	?	?	57	cM	y
k1073 (2)Bmerged	?	0	0	0	0	0	0	1	0	0	0	0	0	0	0	57	cM	y
k4352	?	0	0	0	0	0	0	1	0	?	0	0	0	?	0	57	cM	y
k6967	?	0	0	0	0	0	0	1	0	0	0	?	0	?	0	50	cM	y
k7154	?	0	0	0	0	0	0	1	0	0	0	0	0	0	0	57	cM	y
k7968	?	0	0	0	0	0	0	1	0	0	0	0	0	?	0	57	cM	y
k8676	?	0	0	0	0	0	0	1	0	0	0	0	0	0	0	57	cM	y
k9769(2)	?	0	0	0	0	0	0	1	0	0	0	0	0	0	0	54	cM	y
k9878	?	0	0	0	0	0	0	1	0	0	0	0	0	0	0	57	cM	y
k1025(2)D_mk		0	0	?	?	0	0	1	0	0	0	?	0	0	0	57	cM	y
k8330(2)	?	0	0	0	0	0	0	0/1	0	0	0	0	0	0	0	57	cm	y
k2417	?	0	0	0	?	?	?	1	0	0	0	0	0	?	0	57	cM	y
nE 35	?	0	0	0	0	0	0	0	0	0	0	0	0	0	0	52	fp	y
k1035(2)H	?	0	0	0	0	0	0	1	1	0	0	0	0	0	0	54	marm	y
k1169	?	0	0	0	0	0	0	1	1	0	?	0	0	0	0	57	marm	y
k1233	?	0	0	?	0	0	0	1	1	0	0	0	0	?	0	57	marm	y
k1494	?	0	0	0	?	0	0	1	1	0	0	0	0	?	0	57	marm	y
k1582_merged	?	0	0	?	0	0	?	1	1	0	0		0	0	0	57	marm	y
k1614	?	0	0	0	0	0	0	1	1	0	0	0	0	0	0	57	marm	y
k1696(2)D	?	0	0	0	0	0	0	1	1	0	?	0	0	0	0	57	marm	y
k2040(2)A	?	0	0	?	0	0	0	1	1	0	0	0	?	0	0	57	marm	y
k2371	?	0	0	0	0	0	0	1	1	0	0	0	0	0	0	57	marm	y
k2629_merged	?	0	0	0	?	?	?	1	1	0	0	0	0	0	0	57	marm	y
k2821	?	0	0	0	0	0	0	1	1	0	?	0	0	0	0	60	marm	y
k3132	?	0	0	0	0	0	0	1	1	0	0	0	0	0	0	57	marm	y
k3560	?	0	0	0	0	0	0	1	1	0	0	0	0	?	?	54	marm	y
k3800	?	0	0	0	0	0	0	1	1	0	0	0	0	?	?	57	marm	y
k4222	?	0	0	0	0	0	?	1	1	0	0	0	0	?	0	57	marm	y
k4324	?	0	0	0	0	0	0	1	1	0	0	0	0	0	0	52	marm	y
k4795 (2)	?	0	0	0	0	0	0	1	1	0	0	0	0	0	0	57	marm	y
k4837	?	0	0	0	0	?	0	1	1	0	0	0	0	?	0	57	marm	y
k5334(2)	?	0	0	0	?	?	0	1	1	0	0	0	0	0	0	57	marm	y
k5428_mk	?	0	0	0	0	0	0	1	1	0	0	0	0	?	0	57	marm	y
k6223	?	0	0	0	0	0	0	1	1	0	0	0	0	0	0	60	marm	y
k6570	?	?	?	0	0	0	0	1	0/1	0	0	0	0	?	0	58	marm	y
k6788	?	0	0	0	0	0	0	1	1	0	0	?	0	0	0	57	marm	y
k6970	?	0	0	?	0	0	0	1	1	0	0	0	0	0	0	57	marm	y
k8219	?	0	0	0	0	0	0	1	1	0	?	0	0	?	0	56	marm	y
k9303	?	0	0	0	0	0	0	1	1	0	0	0	0	0	0	60	marm	y
k9375	?	0	0	0	0	0	0	1	1	0	0	upper	0	0	?	52	marm	y
k9494	?	0	0	0	0	0	0	1	1	0	0	0	0	0	0	57	marm	y
nE 13	?	0	0	0	0	0	0	1	1	0	0	0	0	0	?	50	marm	y
nE 27	?	0	0	0	0	0	0	1	1	0	0	0	0	0	0	57	marm	y
nE 37	?	0	0	0	0	0	0	1	1	0	0	0	0	0	0	57	marm	y
nE 39	?	0	0	0	0	0	0	1	1	0	?	0	0	0	0	57	marm	y
nE 43	?	0	0	0	0	0	0	1	1	0	0	0	0	?	0	57	marm	y
nE 5	?	0	0	0	0	0	0	1	1	0	0	0	?	0	0	57	marm	y
nE 67	?	0	0	0	0	0	0	1	1	0	0	0	?	0	0	57	marm	y
nE 71	?	0	0	0	0	0	0	1	1	0	0	?	0	?	0	52	marm	y
k1637(2)	?	0	0	0	0	0	0	1	1	0	0	0	0	0	0	54	marm	y
k7614	?	0	0	0	0	0	?	1	0	0	0	0	0	0	0	57	cM	y
k1261	?	0	0	0	?	?	?	1	1	0	0	0	0	0	0	57	marm	y
k1280	?	0	0	?	?	0	?	1	1	0	0	0	0	?	0	57	marm	y
k1418	?	0	0	?	?	0	0	1	1	0	0	0	0	?	?	57	marm	y
k1674	?	0	0	0	0	0	0	1	1	0	0	0	0	upper	0	57	marm	y
k1266	?	0	0	0	1	1	1	1	1	1	1	1	1	1	1	57	NWM	y
k3503	?	0	0	0	1	1	1	1	1	1	1	1	1	1	?	57	NWM	y
K5754/k5754(2)	?	0	0	0	?	1	1	1	?	1	1	1	1	1	1	60	NWM	y
k6463(2)D	?	0	0	0	1	1	1	1	1	1	1	1	?	1	1	57	NWM	y
k7982(2)	?	0	0	0	1	1	1	1	1	1	1	1	1	1	1	52	NWM	y
k8407	?	0	0	0	1	1	1	1	1	1	1	1	1	1	1	52	NWM	y
k4969(2)	?	0	?	?	?	?	?	0/1	1	?	?	?	?	?	?	52	?	n
k4726	?	0	0	0	?	?	0	1	1	0	0	0	0	0	?	50	marm	y
k1347	?	0	0	0	0	0	0	1	1	1	?	0	0	0	0	57	call	y

## Sheet: Suppl_Table_S7
Supplemental Table S7. Population information for Platy-1 candidate loci.
ID	Pygmy marmoset	human	Cm_NE-10	Cm_NE-6	Cm_NE-9	Cm_NE-3	Cm_NE-1	Cm_NE-7	Cm_NE-5	Cm_1-2008	Cm_NE-2	Cm_NE-4	Cm_NE-8	Cm_SW-27537	Cm_SW-19478	Cm_SW-27552	Cm_SW-17461	Cm_SW-17953	Cm_SW-272	Cm_SW-19570	Cm_SW-25556	Cm-34040	Cm-34044	Cm_CJ1590	Cm_34042	Cm_34043
locus 100	?	0	1	1	1	1	1	1	1	1	1	1	1	1	1	1	1	1	1	1	1	1	1	1	1	1
locus 126	0	0	0/1	0/1	0/1	0/1	0/1	0/1	0/1	0/1	0/1	0/1	0/1	0/1	0/1	0/1	0/1	0/1	0/1	0/1	0/1	0/1	0/1	0/1	0/1	0/1
locus 160	0	0	1	1	1	1	1	1	1	1	1	1	1	1	1	1	?	1	1	1	1	1	1	1	1	1
locus 196	0	0	1	1	1	1	1	1	1	1	1	1	1	1	1	1	1	1	1	1	1	1	1	1	1	1
locus 172	0	?	1	1	1	1	1	1	1	1	1	1	1	1	1	1	1	1	1	1	1	1	1	1	1	1
locus 192	0	0	0/1	0/1	0/1	0/1	0/1	0/1	0/1	0/1	0/1	0/1	0/1	0/1	0/1	0/1	0/1	0/1	0/1	0/1	0/1	0/1	0/1	0/1	0/1	0/1
locus 183	0	?	1	0/1	1	1	1	1	1	1	1	1	1	1	1	1	1	1	1	1	1	1	1	1	1	1
locus 110	1	?	1	1	1	1	1	1	1	1	1	1	1	1	1	1	1	1	1	1	1	1	1	1	1	1
locus 112	1	0	1	1	1	1	1	1	1	1	1	1	1	1	1	1	1	1	1	1	1	1	1	1	1	1
locus 118	1	0	1	1	1	1	1	1	?	1	1	1	1	1	1	1	1	1	1	1	1	1	1	1	1	1
locus 46	1	0	0/1	0/1	0/1	0/1	0/1	0/1	0/1	0/1	0/1	0/1	0/1	0/1	0/1	0/1	0/1	0/1	0/1	0/1	0/1	0/1	0/1	0/1	0/1	0/1
locus 188b	0	0	1	1	1	1	1	1	1	1	1	1	1	1	1	1	1	1	1	1	1	1	1	1	1	1
1455chr20	0	0	1	1	1	1	1	1	1	1	1	1	1	1	1	1	1	1	1	1	1	1	1	1	1	1
4494chr15	0	0	1	1	1	1	1	1	1	1	1	1	1	1	1	1	1	1	1	1	1	1	1	1	1	1
5456chr22	0	0	1	1	1	1	1	1	1	1	1	1	1	1	1	1	1	1	1	1	1	1	1	1	1	1
locus 35	1	0	1	1	1	1	1	1	1	1	1	1	1	1	1	1	1	1	1	1	1	1	1	1	1	1
locus 22	0/1	0	0/1	0/1	0/1	0/1	0/1	0/1	0/1	0/1	0/1	0/1	0/1	0/1	0/1	0/1	0/1	0/1	0/1	0/1	0/1	0/1	0/1	0/1	0/1	0/1
4743chr6	0	0	1	1	1	1	1	1	1	1	1	1	1	1	1	1	1	1	1	1	1	1	1	1	1	1
5778chr8	0	0	1	1	1	1	1	1	1	1	1	1	1	1	1	1	1	1	1	1	1	1	1	1	1	1
8302chr1	0	0	1	1	1	1	1	1	1	1	1	1	1	1	1	1	1	1	1	1	1	1	1	1	1	1
locus 192	0	0	0/1	0/1	0/1	0/1	0/1	0/1	0/1	0/1	0/1	0/1	0/1	0/1	0/1	0/1	0/1	0/1	0/1	0/1	0/1	0/1	0/1	0/1	0/1	0/1
3896chr3a	0	0	0/1	0/1	0/1	0/1	0/1	0/1	0/1	0/1	0/1	0/1	0/1	0/1	0/1	0/1	0/1	0/1	0/1	0/1	0/1	0/1	0/1	0/1	0/1	0/1
3767chr14	0	0	1	1	1	1	1	1	1	1	1	1	1	1	1	1	1	1	1	1	1	1	1	1	1	1
k7614	0	0	1	1	1	1	1	1	1	1	1	1	1	1	1	1	1	1	1	1	1	1	1	1	1	1
k4353	0	0	1	1	1	1	1	1	1	1	1	1	1	1	1	1	1	1	1	1	1	1	1	1	1	1
k8330(2)	0	0	0/1	0/1	0/1	0/1	0/1	0/1	0/1	0/1	0/1	0/1	0/1	0/1	0/1	0/1	0/1	0/1	0/1	0/1	0/1	0/1	0/1	0/1	0/1	0/1
locus 134	0	0	1	1	1	1	1	1	1	1	1	1	1	1	1	1	1	1	1	1	1	1	1	1	1	1
locus 124	0/1	0	0/1	0/1	0/1	0/1	0/1	0/1	0/1	0/1	0/1	0/1	0/1	0/1	0/1	0/1	0/1	0/1	0/1	0/1	0/1	0/1	0/1	0/1	0/1	0/1
locus 146	0	0	0	0	0	0	0	0	0	0	0	0	0	0	0	0	0	0	0	0	0	0	0	0	0	0
locus 166	0/1	0	0/1	0/1	0/1	0/1	0/1	0/1	0/1	0/1	0/1	0/1	0/1	0/1	0/1	0/1	0/1	0/1	0/1	0/1	0/1	0/1	0/1	0/1	0/1	0/1
2792chr2	?	0	1	1	1	1	1	1	1	?	1	1	1	1	1	1	1	1	1	1	1	1	1	1	1	1
2102chr21	0	0	1	1	1	1	1	1	1	1	1	1	1	1	1	1	1	1	1	1	1	1	1	1	1	1
1902chr11	0	0	1	1	1	1	1	1	1	1	1	1	1	1	1	1	1	1	1	1	1	1	1	1	1	1
6246chr14	0	0	0	0	0	0	0	0	0	0	0	0	0	0	0	0	0	0	0	0	0	0	0	0	0	0
0369chr1	0	0	1	1	1	1	1	1	1	1	1	1	1	1	1	1	1	1	1	1	1	1	1	1	1	1
0164chr3	1	0	1	1	1	1	1	1	1	1	1	1	1	1	1	1	1	1	1	1	1	1	1	1	1	1
8302chr1	0	0	1	1	1	1	1	1	1	1	1	1	1	1	1	1	1	1	1	1	1	1	1	1	1	1
9310chr1	0	0	1	1	1	1	1	1	1	1	1	1	1	1	1	1	1	1	1	1	1	1	1	1	1	1
6764chr11	0	0	1	1	1	1	1	1	1	1	1	1	1	1	1	1	1	1	1	1	1	1	1	1	1	1
7055chr3	0	1	1	1	1	1	1	1	1	1	1	1	1	1	1	1	1	1	1	1	1	1	1	1	1	1
8524chr3	?	0	1	1	1	1	1	1	1	1	1	1	1	1	1	1	1	1	1	1	1	1	1	1	1	1
5456chr22	0	0	1	1	1	1	1	1	1	1	1	1	1	1	1	1	1	1	1	1	1	1	1	1	1	1
7612chr10	0	0	1	1	1	1	1	1	1	1	1	1	1	1	1	1	1	1	1	1	1	1	1	1	1	1
0953chr1	0	0	1	1	1	1	1	1	1	1	1	1	1	1	1	1	1	1	1	1	1	1	1	1	1	1
8914chr6	?	0	1	1	1	1	1	1	1	1	1	1	1	1	1	1	1	1	1	1	1	1	1	1	1	1
9159chr7	0	0	1	1	1	1	1	1	1	1	1	1	1	1	1	1	1	1	1	1	1	1	1	1	1	1
5147chr15	0	0	1	1	1	1	1	1	1	1	1	1	1	1	1	1	1	1	1	1	1	1	1	1	1	1
k1025(2)	0	?	0	1	0/1	0	1	0/1	0	0/1	1	1	0/1	1	0	0/1	1	0/1	0/1	0	1	1	0/1	0/1	0/1	0/1
k1054	0	0	1	1	1	1	1	1	1	1	1	1	1	1	1	1	1	1	1	1	1	1	1	1	1	1
k1073(2)	0	0	1	1	1	1	1	1	1	1	1	1	1	1	1	1	1	1	1	1	1	1	1	1	1	1
k2417	0	0	1	1	1	1	1	1	1	1	1	1	1	1	1	1	1	1	1	1	1	1	1	1	1	1
k7154	0	0	1	1	1	1	1	1	1	1	1	1	1	1	1	1	1	1	1	1	1	1	1	1	1	1
k7968	0	0	1	1	1	1	1	1	1	1	1	1	1	1	1	1	1	1	1	1	1	1	1	1	1	1
k4352	0	0	1	1	1	1	1	1	1	1	1	1	1	1	1	1	1	1	1	1	1	1	1	1	1	1
k8676	0	0	1	1	1	1	1	1	1	1	0/1	1	1	1	1	1	1	1	1	1	1	1	1	1	1	1
k9878	0	0	0/1	0/1	0/1	0/1	0/1	0/1	0/1	0/1	0/1	0/1	0/1	0/1	0/1	0/1	0/1	0/1	0/1	0/1	0/1	0/1	0/1	0/1	0/1	0/1
k9679(2)	0	0	1	1	1	1	1	1	1	1	1	1	1	1	1	1	1	1	1	1	1	1	1	1	1	1
k6967	0	0	1	1	1	1	1	1	1	1	1	1	1	1	1	1	1	1	1	1	1	1	1	1	1	1

## Sheet: Suppl_Table_S8
Supplemental Table S8. Primer and amplicon size information for tested Platy-1 loci
	Chromosome Location			Primer Information					Virtual PCR Sizes
chromosome number	left coordinate	right coordinate		Forward Primer Name	Forward Primer	Reverse Primer Name	Reverse Primer	Marmoset	Human	Chimp	Rhesus	Orangutan	Squirrel Monkey
3	67100071	67100164		67100164chr3-ss-F	AGAACTCAAAACACCTGATGAAG	67100164chr3-ss-R	AAATTCTCATGTATCTTCTGAAAAGC	297	186	186	189	184
7	72890108	72890211		72890211chr7-ss-F	CAAATAACCCAATTAAATAATGAGCA	72890211chr7-ss-R	TTGCAGTTGCCAGGTCATAG	483	328	328	337	326
5	61480221	61480314		61480314chr5-ss-F	CGCTTCCTTGACTGGTTAGA	61480314chr5-ss-R	CCCAGAGAGGTCAGTTCTCC	299	183	181	182	180
16	79800267	79800366		79800366chr16-ss-F	CTCTTCTTTCTGCTCATATCTGATTTT	79800366chr16-ss-R	GTCTCATTCTGGGGCTTTGA	497	324	324	n/a	324
1	153110266	153110369		153110369chr1-ss-F	GGTGAAGTCCACTGCACATAAA	153110369chr1-ss-R	GCCACTGCTCCCTGTAAAGT	339	166	166	165	165
1	192890415	192890518		192890415chr1-ss-F	GGCTGCATTGCTCTTAGCAT	192890415chr1-ss-R	CTTGAGCTCCTTTGGCATTG	254	121	121	122	121
10	80040457	80040560		80040560chr10-ss-F	AATTCATTCAGAAATATCAATAAACCT	80040560chr10-ss-R	CTCAAATTCCTGACCTCAAGTG	557	450	452	444	452
13	48990608	48990695		48990695chr13-ss-F	TCCAGGCTTTACTTCTCCCATA	48990695chr13-ss-R	GGCCAGTATTTGCAGCATTT	358	234	234	462	234
2	176900692	176900784		176900784chr2-ss-F	CAACATGAGCAAACGAAAGC	176900784chr2-ss-R	TTCGCTCCTTTAAAATCATCA	355	247	247	252	246
1	114610850	114610953		114610953chr1-ss-F	CCCATTTCAAAGTTAGAATTACCA	114610953chr1-ss-R	GACTGAAACACAAGCCTTTCATAA	300	165	165	165	165
11	122561297	122561301		122561301chr11-ss-F	AAAATTAATCTTTGGTTCTGAGCAA	122561301chr11-ss-R	TGTTTCCTTGGATGACCTGA	499	370	370	371	369
6	31051231	31051324		31051324chr6-ss-F	CTGAAATGAATTGAAAGGTCCA	31051324chr6-ss-R	AAGTGGGCTGGGATAGTGAA	389	253	253	258	253
10	46271291	46271394		46271394chr10-ss-F	GAAGAGAAGTGGAGGCCAGTC	46271394chr10-ss-R	CCTGTTGTGCCAAGGAACTT	519	356	356	386	386
13	90381323	90381425		90381425chr13-ss-F	CCCTATTCTCCATGCTATTTGG	90381425chr13-ss-R	GGAGGAGCTAGTTGGCAGATT	399	256	255	261	248
9	28501323	28501426		28501426chr9a-ss-F	GGTGATTTGGTCCTGCAGTT	28501426chr9a-ss-R	TCTATGCCAGGAATTGAAACTCT	673	574	568	551	566
20	14271352	14271455		14271455chr20-ss-F	AGATGCAATGCTGAGACCTG	14271455chr20-ss-R	CCCTTGTTTCTTGCCAACAG	488	352	352	351	352
11	75981799	75981902		75981902chr11-ss-F	AGCTTCTTGCCTTGATCTGC	75981902chr11-ss-R	TACATATGCTAAAATGATGTATCTGGT	429	313	313	291	167
21	26901988	26902091		26902091chr21-ss-F	TTCTGATCCATCCCTGGTGT	26902091chr21-ss-R	TGAAATAATGGCTTCAAGTGTTTG	336	200	200	Rhesus has N's from beginning till right side of alignment	200
21	41732009	41732102		41732102chr21-ss-F	TTACAGTCATATCAAATGTTCCACA	41732102chr21-ss-R	TATCCATCCCCTCAAGCATT	395	268	268	266	803
7	11072090	11072178		11072178chr7-ss-F	CCTGAACAGTGTCTGCAAGG	11072178chr7-ss-R	TGAGTTTCCCCTTCACCATC	556	370	371	375	369
9	67702163	67702230		67702230chr9-ss-F	GCAAATCAGAGTTCCAATTGAC	67702230chr9-ss-R	GAGGCATTAAGAGGCAGTGTG	271	171	171	170	171
12	75612164	75612267		75612267chr12-ss-F	TTATGTGCCAGGTTCTGTGC	75612267chr12-ss-R	CAAAATTGGCGGTATCTGCT	471	342	345		340
5	93952413	93952500		93952500chr5-ss-F	AGACACTGGTTGAAAGCAACA	93952500chr5-ss-R	TCTCCATTTCTGTGTAGCCAAC	349	232	233	230	222
2	47542689	47542792		47542792chr2-ss-F	CCTCGCCATCTCTTCCTTCT	47542792chr2-ss-R	AAAGGAGCAGGTAGGGGAAC	430	300	301	301	301
6	142823172	142823271		142823271chr6-ss-F	TTTCTCTGCCAAGTGGTTCA	142823271chr6-ss-R	AGTGTTTTGCTGTCTATGGCTATT	467	311	311	315	311
14	10623664	10623767		10623767chr14-ss-F	TGGGAAGTGGTTAGGTCAGG	10623767chr14-ss-R	GCTCAGGCAAGGTGACAGTT	566	437	437	434	437
3	99973793	99973896		99973896chr3a-ss-F	TGAGAAATCACCAAACTGCTTT	99973896chr3a-ss-R	TTCACAGGTTAAGCAGGAAAGTT	541	400	400	398	399
12	21694011	21694114		21694114chr12-ss-F	TGAGCCAAGGTTGAACCACT	21694114chr12-ss-R	AGTGGGATTGCTGGATCATA	244	115	114	111	116
15	56294390	56294494		56294494chr15-ss-F	ATTGTTGCAGGTGATACAGGA	56294494chr15-ss-R	GGTCACCTTTGAAGAATAGTAGGG	237	98	98	98	98
7	152524455	152524554		152524554chr7-ss-F	ATGGGGAAGAAGGAAGAAGC	152524554chr7-ss-R	ACTGAATCATGCCTTCACCA	240	99	99	99	99
7	29184598	29184692		29184692chr7-ss-F	AGATTGCAATGGATCAAAGC	29184692chr7-ss-R	TTTCCCCTTAAGAATAGTGAAAAG	300	182	181		182
6	24584649	24584743		24584743chr6-ss-F	GCTATCTGAGTCAGCAGGTAGG	24584743chr6-ss-R	TCCAGCACCCACTTTCCTTA	679	538	533	540	536
7	50904816	50904920		50904920chr7-ss-F	TGCTAGGCTCAAGCAATCTG	50904920chr7-ss-R	CCTTAAGATAACCAAGACAATGTTGA	296	341	342	336	341
18	35204850	35204953		35204953chr18-ss-F	GCTGAGATTACGGGCATGAG	35204953chr18-ss-R	CAAATTGTCACATTCTAGAACCTACCT	696	-	-	-	-
15	86455044	86455147		86455147chr15-ss-F	GTTGGAAAACACCCCAGAAA	86455147chr15-ss-R	TGGGTTATTTTACTAGCCAGAGG	485	359	359	357	359
5	42725122	42725226		42725226chr5-ss-F	GGTGCCACTGACATTTAGGC	42725226chr5-ss-R	GTTCCCCTTACTGGGTCTCA	372	262	262	259	262
22	43405353	43405456		43405456chr22-ss-F	CACAGGTGTGAGCAAGCTAAG	43405456chr22-ss-R	TTGAGGCGTAAAGGGTATGG	248	121	121	rhesus is too short to align	119
5	78905466	78905538		78905538chr5-ss-F	CATGTACCTTACTGTCGGATGA	78905538chr5-ss-R	CCCTCTGCTCTTCTCACATACT	231	134	134	119	135
4	14445600	14445703		14445703chr4-ss-F	GACAGAATCAAGACATGGGAAA	14445703chr4-ss-R	GACCTGGGCTTGGTCAGAG	554	424	424	422	424
8	46415675	46415778		46415778chr8-ss-F	GCTGTATAAATCTGCTCAACTCCA	46415778chr8-ss-R	AAATCTAAATGGGTGGTGACAA	667	517	510	499	529
15	40886031	40886134		40886134chr15-ss-F	CTGTGTCTGAATAGTTCCTTTCC	40886134chr15-ss-R	TCTCTGACTGGTGACTTTGGTC	272	143	145	131	145
14	18696143	18696246		18696246chr14-ss-F	TTCCCATTAAACTACCACTGACA	18696246chr14-ss-R	ATGTTGTTTTGATGACTGTAGCC	298	188	188	184	189
19	27556153	27556256		27556256chr19-ss-F	GCTGGAGTGTAGTGGCATGA	27556256chr19-ss-R	AGTTCTGAGTCCCGGCTGTA	642	360	358	363	364
18	29046189	29046265		29046265chr18-ss-F	TCCCAAAGAGAGAAGGCTACTG	29046265chr18-ss-R	CACAGATACATTCTTTCTACCTGCT	249	119	119	119	n/a
15	54106236	54106340		54106340chr15-ss-F	TCCATTTGCTACCAACAGCTC	54106340chr15-ss-R	TCAGGACCAGGTCAATTCTG	386	272	272	270	271
2	28046310	28046413		28046413chr2-ss-F	TGACCAAAGCTTTCCAATGA	28046413chr2-ss-R	AGCAGGAAATTTGGCTTCAA	383	245	245	245	245
10	113356500	113356584		113356584chr10-ss-F	GAAGCCTTCACGAAATTCAGTT	113356584chr10-ss-R	TCCTTAAAATTATGGGATGCAGA	395	310	310	310	309
11	19856662	19856764		19856764chr11-ss-F	ACCTACATGGTTTGCCCAAG	19856764chr11-ss-R	AGCTAACCCCTCCCTTGTTT	575	444	443	442	443
8	106646715	106646791		106646791chr8a-ss-F	GTTGCCCAGGCTGATCTC	106646791chr8a-ss-R	TGGTTGTCCTTTTCTGAATGC	192	78	78	78	78	192
5	53516702	53516806		53516806chr5-ss-F	CCCTGTGAACTGCCTACTGC	53516806chr5-ss-R	CCCAGGCAATTCTAATGAGC	476	332	332	347	349
2	38896768	38896870		38896870chr2a-ss-F	AGACCTGTGCACCTCTGGAT	38896870chr2a-ss-R	GGCTGGTCCTAAACACCTGA	555	-	-	-	-
16	88526841	88526944		88526944chr16-ss-F	TGTTGCTGAAGGGTAGGATTTC	88526944chr16-ss-R	TGAGCATCAAGTATGAATGCAA	754	338	337	n/a	n/a
3	139597055	139597175		139597055chr3a-ss-F	GCAGATGCACCTAATCTACTTCAA	139597055chr3d-ss-R	GCTGCTGAGTTACCCTGAAC	1026	848	848	-	846	846
3	90886998	90887092		90887092chr3-ss-F	CTAGCCATGGTCTGTGCAAC	90887092chr3-ss-F	TCTCTGTTGTCAAAGTGAAGTAACC	382	255	266	263	267
15	73777131	73777232		73777232chr15-ss-F	TTAGCCTTGACCAACATAAGCA	73777232chr15-ss-R	AGTGTGCAGGTGTCCTTTCC	299	258	260	179	271
10	85707131	85707234		85707234chr10-ss-F	CACTACTGGGTATCTATCCAAAGG	85707234chr10-ss-R	TAATGGCCTCAAGTCCCATC	399	265	265	235	265
14	72067153	72067256		72067256chr14-ss-F	TTGCATAAACATTCACAGCTTTT	72067256chr14-ss-R	GCATTCAATCTAAGGCAGTGG	471	318	318	317	320
10	74677509	74677612		74677612chr10-ss-F	TGCTCTAAGCCTCATTGGAGA	74677612chr10-ss-R	GGCTGTCTTGGTGGAATAGC	577	446	450	439	450
16	27097553	27097656		27097656chr16-ss-F	GCAAATTTACACTATGTTGCTCCTA	27097656chr16-ss-R	GCAAACAGCATCACACTGGT	386	254	257	253	257
2	137557706	137557790		137557790chr2-ss-F	GAACTCATAGTGAACAGCGCTATAA	137557790chr2-ss-R	ATCAGAAGATTTCCTACATACAATGG	260	144	144	155	148
6	135107940	135108025		135108025chr6-ss-F	CAGCCTTCTGGGTCTCAAAC	135108025chr6-ss-R	TTCCATTCAGAATTATCCCAGA	568	772	786	792	n/a
1	151458199	151458302		151458302chr1-ss-F	GCCCATTGTAAGAGCTCAGT	151458302chr1-ss-R	TGCTCAAGAAGCAGCTCAG	400	266	266	273	267
3	143208303	143208373		143208373chr3-ss-F	CCAGCACCCAACTAAATGGT	143208373chr3-ss-R	ATCTCCTAGGCACCTCATTAAA	448	358	358	355	358
5	133298328	133298431		133298431chr5-ss-F	CAAATGGATGGGCAACTTCT	133298431chr5-ss-R	TCAATGAGCTGAAGCGACTG	682	574	574	568	572
3	16388421	16388524		16388524chr3a-ss-F	CTGCCTTGACTTTCCCTTGA	16388524chr3a-ss-R	GGAAATCTTTGGGAGAAAAGC	599	459	459	465	460
16	78628633	78628736		78628736chr16-ss-F	TCACTCCACTATCTGTGGCTGT	78628736chr16-ss-R	CTGGCAGGACACATTGAAGA	649	580	566	578	579
6	45028810	45028914		45028914chr6-ss-F	ATGCAGACCCTGATTATTCCA	45028914chr6-ss-R	AGCCAACCACGTAAGTGTCA	787	555	565	556	552
7	103789056	103789159		103789159chr7-ss-F	CCAACAGCTTAACTGCAACC	103789159chr7-ss-R	AAGAAGAGCGATGGGAGGAT	488	662	656	678	671
19	27799127	27799230		27799230chr19-ss-F	GAACCAGTCCAATTATTTACATCAAA	27799230chr19-ss-R	ACCCAAGTAGGTGGCAAGGT	489	385	385	382	381
2	124439240	124439307		124439307chr2-ss-F	AATAATCCTTCAACCTCACTTCAA	124439307chr2-ss-R	TTCCTAAAACTCTGGGTATGATG	437	281	278	278	278
1	90249207	90249310		90249310chr1-ss-F	ATGCAAATGGGATTGCTCTC	90249310chr1-ss-R	ACCTTTAAAATGTGCAGGCTCT	421	299	299	299	298
1	199289250	199289353		199289353chr1-ss-F	AAGCATTCACATTTGTACACCA	199289353chr1-ss-R	TGCATTATTTTAGTTATCCTGTTTGC	377	244	244	243	239
7	98649786	98649853		98649853chr7-ss-F	TGGAAGGTCAAGATGGGAGA	98649853chr7-ss-R	CTCCTCCATGGGAAATTAAGTT	807	724	728	716	724
7	98219782	98219885		98219885chr7-ss-F	GTGCTGGGATTACAGGTGTG	98219885chr7-ss-R	AGTTTCCAAGCCTCACTTCC	Marmoset and Rhesus not showing up in online pcr when I enter sequence	120	120	Marmoset and Rhesus not showing up in online pcr when I enter sequence	120
8	125463818	125463921		cM_nE_10_c8-SS-F	GCCATCAACTGTTTGGCTTT	cM_nE_10_c8-SS-R	CTGTGCATGCATCTTGTTGA	629	517	519	519	523
18	1686065	1686168		cM_nE_100_c18-SS-F	CATCGGGACAACTTGGTTCT	cM_nE_100_c18-SS-R	GCCATACATGGTCACTGCTG	244	n/a	n/a	n/a	n/a
16	41753866	41753969		cM_nE_102_c16-SS-F	ATGAGGGAACTGAGGCAGAA	cM_nE_102_c16-SS-R	AATACTGCATTCCCTCCAAAA	676	551	551	554	551
12	81499546	81499649		cM_nE_104_c12-SS-F	GCAAATGTATACTTTATTTGCTTCAG	cM_nE_104_c12-SS-R	CCTTGCTGTATCCTTTCAACATT	280	153	153	154	153
5	30129209	30129312		cM_nE_106c_c5-SS-F	AGCCACTTAATGGCAAGAGC	cM_nE_106c_c5-SS-R	TGCAGGTTAATGAAAGGTTGTG	336	188	190	190	188
4	80848109	80848212		cM_nE_108_c4-SS-F	AAGGCATATATGTGGACAATAGAAA	cM_nE_108_c4-SS-R	TGGCAATAGCATGTCTTTAAGTTC	587	464	463	461	467
20	21598242	21598345		cM_nE_110_c20-SS-F	GGCCACACCCTGTCTCTTTA	cM_nE_110_c20-SS-R	CCCAGGAGGTCTAGCCTGTA	223	n/a	n/a	n/a	n/a
2	119536865	119536968		cM_nE_112_c2-SS-F	CATTTCAGCTGATGGCATTT	cM_nE_112_c2-SS-R	TGGCCCTAAATGTATCTGACA	347	196	196	196	196
18	45022000	45022103		cM_nE_116c_c18-SS-F	GGCCACTATAACCCTGATGC	cM_nE_116c_c18-SS-R	TCAAATATAGAACCAACCTTGCATT	322/326/3334	166	166	168	n/a
11	69067877	69067980		cM_nE_118_c11-SS-F	TCTGTGGGTATCTCTGGGAAGT	cM_nE_118_c11-SS-R	CTGCTATAGCTCCAGTGTTTAGAA	400	258	274	258	260
3	104618033	104618136		cM_nE_12_c3-SS-F	TGTGCCATTTGGTAACATTATGA	cM_nE_12_c3-SS-R	AAATGCTGGAGGTGATGGAT	889	n/a	n/a	n/a	n/a
10	12988384	12988487		cM_nE_120_c10-SS-F	TCAGCACTCCCAACTCACTG	cM_nE_120_c10-SS-R	TTTGTGGTTCTTCCCCTGTA	375	266	266	266	266
1	85206450	85206553		cM_nE_122_c1-SS-F	TGCATAAACAAAGAACACTGGTAA	cM_nE_122_c1-SS-R	GCTTTATTCCCATCACCTTCTC	323	199	199	200	199
2	188908444	188908537		cM_nE_124_c2-SS-F	TCATGGTTGAGATCATGGAGA	cM_nE_124_c2-SS-R	ATGTCCCAAGCAGTCAGGAT	593	470	470	475	470
8	71488175	71488278		cM_nE_126_c8-SS-F	AAAAGGTTTATGGAAATCTGACCTT	cM_nE_126_c8-SS-R	TACATGAAAATCTTGTTTAAGAGAGAA	290	148/152	148/152	158	152
7	134925560	134925663		cM_nE_128b_c7-SS-F	CTGCTCTTCGAAAGACATGATT	cM_nE_128b_c7-SS-R	GAGCATCTTTTCATGCCATC	363	219	219	n/a	n/a
6	63571514	63571617		cM_nE_130_c6-SS-F	GTGGGGCATCATTAGACCAT	cM_nE_130_c6-SS-R	GCTATTCATTGACAAATGTTTTGG	378	219	215	221	219
5	111623094	111623197		cM_nE_132b_c5-SS-F	TTGGCAGCACCAATAGAAAA	cM_nE_132b_c5-SS-R	GGGAGGCTAAGCCACACTTT	296	150	151	159	151
3	85563925	85564028		cM_nE_134_c3-SS-F	CCCATTCTTAAAAGCTTTCACTGT	cM_nE_134_c3-SS-R	GGAGTTGGGATAATGGAGAGG	295	161	161	162	161
16	93895391	93895494		cM_nE_136_c16-SS-F	CAGAAGCTGTTCTGCCTATTAATGT	cM_nE_136_c16-SS-R	GACCAGTACCCTAACTACTCAAAAGAA	300	150	150	149	150
15	20948869	20948972		cM_nE_138_c15-SS-F	GGAGATAATGCATGTGGGAAAT	cM_nE_138_c15-SS-R	AGGGGTCTATGAGACCAAGG	372	247	247	n/a	241
1	53283590	53283693		cM_nE_140_c1-SS-F	TGTTTCCCAAAGGAACTATACCAT	cM_nE_140_c1-SS-R	CATCAGAAGCTTGTTCTATCAAAA	580	427	427	426	425
Un	2884	2987		cM_nE_142_cUn-SS-F	TGAAATGGTAAGAGCCGAAAA	cM_nE_142_cUn-SS-R	CAATCCAAAAGACATCGAGGA	985	844	839	542	549
8	95939099	95939202		cM_nE_144b_c8-SS-F	TGAGGAAACTGAGGCCAGTA	cM_nE_144b_c8-SS-R	CCAGCTGTTGCTTGTTCCTT	152	n/a	n/a	n/a	n/a
6	118903408	118903511		cM_nE_146_c6-SS-F	GGCATTCAAATATCAGAGGTGTT	cM_nE_146_c6-SS-R	CACAGGCCAAATGTAGAGCA	934	843/846/848	847	868	881
4	148155159	148155262		cM_nE_148_c4-SS-F	GAAAAGGCTTGAAGGCAAAG	cM_nE_148_c4-SS-R	CCTCTGTAATCCAGGCCATC	377	n/a	n/a	n/a	n/a
11	15695984	15696087		cM_nE_14c_c11-SS-F	TCTTTTCCTGGGTCTCTCCA	cM_nE_14c_c11-SS-R	TTCATTGGGATGGAATTGGT	632	539	545	546	542
4	31079678	31079781		cM_nE_150_c4-SS-F	GTGCAGGCAATCTTCATACC	cM_nE_150_c4-SS-R	AGCTGAGTGAGGACGCTCTTT	362	230	230	230	n/a
2	50869960	50870063		cM_nE_152_c2-mk-f	AAAACCAGAGACAAAAGGAAAA	cM_nE_152_c3-mk-r	CTGGCCTTTTAGCCCCTATG	477	354	355	348	358
18	19822015	19822118		cM_nE_153_c18-mk-f	CTGCAAACAATTCAGGTAACCA	cM_nE_153_c18-mk-r	TTCTGTTTCAGATCGCTCCA	671	547	546	547	548
17	6768971	6769073		cM_nE_154_c17-SS-F	CAGCAATGGATCATTGAAAA	cM_nE_154_c17-SS-R	ATCCTCTTCTCTTTTCGACTTCT	396	280	279	n/a	281
17	3710586	3710687		cM_nE_155_c17-mk-f	GACAAATGAAAGCTGCTACCC	cM_nE_155_c17-mk-r	TCATAGGTAAGGGGAAATGAGAAA	376	267	266	267	264
13	94756380	94756483		cM_nE_156_c13-SS-F	TTCATCTTTTGCCCTCCATT	cM_nE_156_c13-SS-R	GCTAACAAATGAGGAAGGAATGTT	581	780	781	n/a	784
13	73200760	73200863		cM_nE_157_c13-mk-f	TGGTAGCATAAGGGAAATCTCTG	cM_nE_157_c13-mk-r	TGTTATGCATTTAGTAGTTTGGAGA	590	438	438		438
13	55229204	55229307		cM_nE_158c_c13-SS-F	ACCAATATTAATTTCCTGATTTTGA	cM_nE_158c_c13-SS-R	GCATGCTGCTTGTCAGAAAGT	979	1180	1181	856	866
1	24175829	24175932		cM_nE_160a_c1-SS-F	CCAATTGCTAGGCTTTGGAC	cM_nE_160a_c1-SS-R	GCCCACCTGGAAAGTTCTTA	327	203	203	203	203
15	80734694	80734794		cM_nE_162_c15-SS-F	CTGTCTTGCATGCTCTGCTC	cM_nE_162_c15-SS-R	GAGGCATAATTTTAATGTGAAGCA	351	n/a	n/a	n/a	n/a
1	14443655	14443755		cM_nE_164_c1-mk-f	GAACAAGCCTCACAGCATTC	cM_nE_164_c1-mk-r	CTTTGCCCACTATCATCATCC	385	253	239	253	255
9	51819464	51819567		cM_nE_166_c9-SS-F	TCATTATGCCAATCTCTACCTTT	cM_nE_166_c9-SS-R	ACATAGAAAACAAATAGCAAAATGG	232	111	111	111/420	111
6	74770904	74771007		cM_nE_168_c6-SS-F	AATTCAATAGGTTAGGTGAAATGAAC	cM_nE_168_c6-SS-R	TCACAAGATTTCAATAATGTGTTAGGA	274	133	133	133	132
8	119848392	119848495		cM_nE_16b_c8-SS-F	GCTGTCCACTTGCTGAAAGA	cM_nE_16b_c8-SS-R	CCATATTTTGTGTTGCAAGTGT	395	259	259	260	260
16	32345114	32345217		cM_nE_170_c16-SS-F	TGGCTATATATGAAAACTGACTGAAT	cM_nE_170_c16-SS-R	AACCATCAGTGTGATTTAAAAGTGT	1110	981	983	674	685
13	107140739	107140842		cM_nE_172_c13-SS-F	GCCTCTTTCCTAGTTGCCAAA	cM_nE_172_c13-SS-R	GAAGTCTAAATCATTGGCAGAAA	596	n/a	n/a	461	260
10	43496270	43496373		cM_nE_174c_c10-SS-F	TGCCACCCTGAGTTCTCTCT	cM_nE_174c_c10-SS-R	CCTCAACCTGACCCTAAGTTTT	772	834	836	n/a	822
1	13477936	13478039		cM_nE_176_c1-SS-F	TGGTAAATGGTGTGGGTGTG	cM_nE_176_c1-SS-R	TGAAGCAAGGTGGGTAACTG	559	412	411	416	n/a
X	7359935	7360038		cM_nE_178_cX-SS-F	AACCTTCACCCCAAACACAC	cM_nE_178_cX-SS-R	AATGGACCTGGAAGGTTTTAG	599	456	456/1132	457	n/a
2	15420687	15420790		cM_nE_18_c2-SS-F	GGGGACTGTGATGGTCTGTT	cM_nE_18 _c2-SS-R	AAGGTCATGGACAGTCTGGAA	373	247	248	n/a	n/a
6	8828848	8828951		cM_nE_181_c6-mk-f	TGCCAAATCACAGTAAAAGCTG	cM_nE_181_c6-mk-r	TAATGGAAAGGAAAATGGACA	835	685	684	685	672
4	107763383	107763486		cM_nE_182_c4-SS-F	TTGTCTCTGGCAGCAATTTT	cM_nE_182_c4-SS-R	CAAATAGCAAAATGGCAGATG	383	286	286	603	286
2	166402105	166402208		cM_nE_183_c2-mk-f	GGTTCATAGATTTTGTGGTCTCATT	cM_nE_183_c2-mk-r	TCCTGTAGAGAAGTAGTCACTAACAAA	290	180	180	180	178
10	62914820	62914923		cM_nE_184b_c10-SS-F	GATGGGTGAGCCAATTTCTT	cM_nE_184b_c10-SS-R	AGTGAGTTTATATGCATTCTTCATGG	469	333	334	312	334
7	98230944	98231047		cM_nE_186_c7-SS-F	GCTGGGCACTGTTCTAGATG	cM_nE_186_c7-SS-R	CCTGTCTCTAGCTGGTTCTCAA	500/578	461	466	465	466
2	48657205	48657308		cM_nE_188b_c2-SS-F	GGCAGTTCAGCCCTAGAGAG	cM_nE_188b_c2-SS-R	TGATGGTCACTGGGTTGTTT	594	456	442	n/a	447
11	38878220	38878322		cM_nE_190_c11-SS-F	TCATTGGTACTATTTCTGCTTCAT	cM_nE_190_c11-SS-R	GCAACATATGTCCACCAAAGC	687	556	570	568	569
22	24785965	24786068		cM_nE_192_c22-SS-F	TGTACCCAAAATTTATATGGAAAGG	cM_nE_192_c22-SS-R	GAGTCCTCCAATTTTGTTCTTTT	207	79	79	76	79
8	104432935	104433032		cM_nE_194_c8-SS-F	TCCTTCAAGAAACCTGACTTTGA	cM_nE_194_c8-SS-R	TTTTGCCAATTCAGTCATGC	290	179	179	182	179
10	123152350	123152452		cM_nE_196_c10-mk-f	CTGTTCTTGCTCCTGGCTTT	cM_nE_196_c10-mk-r	ATTTACCACTTGGGCAGAGC	389	256	256	259	259
9	90090565	90090668		cM_nE_198_c9-mk-f	ACCTTGACTAATTCAGGCAGTTTT	cM_nE_198_c9-mk-r	AGATTTAACTTCATTTCCCTCTTTT	681	565	565	551	565
1	191725444	191725546		cM_nE_2_c1-SS-F	GCAAAGGATGACTTGTGGTTT	cM_nE_2_c1-SS-R	CAAGCAATTCTCCCTGCTTC	398	259	259	502	261
9	32967762	32967865		cM_nE_20_c9-SS-F	TTTCTTCCCTGGAATTCCTCT	cM_nE_20 _c9-SS-R	GGTGTGGTACCTTATGCCTGT	469	322	323	326	322
2	142063273	142063359		cM_nE_200_c2-mk-f	TGAGCCTGGCTGATGTTACTT	cM_nE_200_c2-mk-r	GTGGCCTTGTAACAGCCATT	678	578	578	579	568
19	92074679	92074781		cM_nE_201_c19-mk-f	TTGGCATCCAGTTCAATTTTC	cM_nE_201_c19-mk-r	TGAATTGGTTGGCATCTTGA	742	630	630	630	630
1	98722353	98722443		cM_nE_202_c1-SS-F	GCATGGGTTCATCTCTGGAC	cM_nE_202_c1-SS-R	CCCAGGTGATCTCATCCACT	249	176	176	176	176
20	1264984	1265087		cM_nE_22_c20-SS-F	TCATGTGAGGGTGTGTTTGC	cM_nE_22 _c20-SS-R	GTTGCTTCCACATTTTCAGG	350	245	245	248	248
16	19941450	19941553		cM_nE_24_c16-SS-F	GAAGGGGACAATGGAAATGA	cM_nE_24_c16-SS-R	TGCAATTAAAACTACCATTCCACA	249	129	129	128	129
10	35360759	35360862		cM_nE_26_c10-SS-F	GACTATCTAGGACCTGTGGACCAT	cM_nE_26_c10-SS-R	TTCAGCAAAATTGCAGAGTACAA	558	n/a	n/a	n/a	n/a
7	31320016	31320119		cM_nE_28b_c7-SS-F	AATAGTTGGGCCACTCAACC	cM_nE_28b_c7-SS-R	TCATGCAGAGCTTGAAATGAG	657	522	522	539	532
19	17664916	17665019		cM_nE_30b_c19-SS-F	TCAGGTTCCACCCTGTTCTC	cM_nE_30b_c19-SS-R	TCAATGAGTTGTTACTGAATGCTG	598	464	464	464	464
10	8257039	8257142		cM_nE_32b_c10-SS-F	CAACCATACTTCCTTAGTCTGCAC	cM_nE_32b_c10-SS-R	AGGGGCTGCATACAAACAAT	286	n/a	n/a	n/a	n/a
2	135973345	135973447		cM_nE_34_c2-SS-F	GAACTTGGGGCTGTATCAGG	cM_nE_34_c2-SS-R	CCTGCAGGTCTGTCTCTGGT	357	227	227	226	228
X	83113163	83113266		cM_nE_36_cX-SS-F	GGGAGATGAACTTTAGCCAAGA	cM_nE_36_cX-SS-R	CACAGCCACTTTTGAAGCAA	347	258	258	258	n/a
5	47233529	47233632		cM_nE_38_c5-SS-F	CAGCACTTTTCACCCATCTTG	cM_nE_38_c5-SS-R	CAATTTGCTCTGGGCTTCAC	398	255	263	270	263
5	24338178	24338281		cM_nE_4_c5-SS-F	AAGTCAAATGAATGACAGCAATGT	cM_nE_4b_c5-SS-R	TTTCAATGTGACCTTTGTCTGA	585	455	455	461	461
2	68940402	68940505		cM_nE_40_c2-SS-F	TGACTAGAACTTGCAGAAATGGAA	cM_nE_40_c2-SS-R	GATCACATCACTGCACTCCA	395	239	229	220	n/a
8	102609336	102609439		cM_nE_42_c8-SS-F	GGGGCAAAATGCATTAGAAA	cM_nE_42_c8-SS-R	TTGAAAACCCTCAGGTCTGAAT	380	235	235	276	244
4	156841017	156841120		cM_nE_44b_c4-SS-F	CTGAGGTATGAGAATCGCTTGA	cM_nE_44b_c4-SS-R	CTCTCGGAACCTCCCATTTT	445	312	313	336	298
3	1653108	1653211		cM_nE_46_c3-SS-F	GGGACATAATTCAACCCATAACA	cM_nE_46_c3-SS-R	TGTTGACTAACGAAGTTCTTCCAA	316	193	193	193	193
18	4877491	4877594		cM_nE_48_c18-SS-F	GCTTGAAGGCAAAGAGGAAG	cM_nE_48_c18-SS-R	GATTTCCTGAAAACACTCTTATTCC	692	250	250	243	250
12	73639485	73639588		cM_nE_50_c12-SS-F	GCTGCCTCTTAAAATTTCTCC	cM_nE_50_c12-SS-R	TCCTTGTCGTTTGGAAAGGT	481	353	353	352	353
10	49220343	49220446		cM_nE_52c_c10-SS-F	TGGGGTTCATCTCTCTGTGA	cM_nE_52c_c10-SS-R	GTTCTGGCCTTGCAAGATGT	849	638	638	642	639
1	128772700	128772803		cM_nE_54_c1-SS-F	CACAAACCAAAGTAAGGCTCA	cM_nE_54_c1-SS-R	TCCTTGGTACACCTGAGTTTAGAA	299	160	160	162	157
5	4146358	4146460		cM_nE_56_c5-SS-F	GCCTCAATATCTGCCATGTTC	cM_nE_56_c5-SS-R	ATTTTTGGCCAGAGCAACTG	500	375	375	364	375
6	144971553	144971657		cM_nE_58_c6-SS-F	TGCTGAAAAGGAACCATATAACT	cM_nE_58_c6-SS-R	CTTTGGCTCTTCATTTCTTCTTTC	328	201	201	204	202
1	161497611	161497714		cM_nE_6_c1-SS-F	GGGAAATCACTCTCTCTTCCAA	cM_nE_6_c1-SS-R	TGTCTGAAAACTTGGGGACAA	296	167	167	167	167
8	49682446	49682549		cM_nE_60c_c8-SS-F	AACTAACAAACACATTGAAAACCTC	cM_nE_60c_c8-SS-R	GCTGCTGTTGGATTTTGCTT	567	418	416	n/a	417
7	117661276	117661379		cM_nE_62_c7-SS-F	TGTGGGTAATCAAATAAAGAATCTGA	cM_nE_62_c7-SS-R	GCAATAGGGCATTGGAGAGA	242	102	102	102	102
3	109997797	109997900		cM_nE_64_c3-SS-F	ACTTTGGATGGTTTCTGCAT	cM_nE_64_c3-SS-R	TTGCTAATATTCACAACAATCTTGC	348	231	231	230	228
21	32962956	32963059		cM_nE_66_c21-SS-F	TGACAACAATGAGAAAGGAACAA	cM_nE_66_c21-SS-R	CACATTTGTTGCTGAAAAGAATAA	491	383	382	383	384
2	149360718	149360821		cM_nE_68_c2-SS-F	AGCTGTTCTCAATCAGGGACT	cM_nE_68_c2-SS-R	TTTTGGTCATTACTGATTATTTGCTT	486	360	360	361	357
13	109142271	109142374		cM_nE_70_c13-SS-F	TCCAAGGAAACCTGAATCAA	cM_nE_70_c13-SS-R	ATTGGGCATTTAGTATGGATTG	263	139	139	139	139
1	100728500	100728603		cM_nE_72_c1-SS-F	CCCAAATGAGTGGTCAGAGG	cM_nE_72_c1-SS-R	TCCATAAATGCCTGCTGTTTT	207	72	74	n/a	73
8	98432734	98432837		cM_nE_74b_c8-SS-F	CTGATGATCTGAGGTGGAACAG	cM_nE_74b_c8-SS-R	AAGTGTTATACTGGTTCAGCCATTT	497	344	344	345	344
6	41758305	41758408		cM_nE_76_c6-SS-F	TGAATGTCTTCAAAACTGTAAGTTGA	cM_nE_76_c6-SS-R	CCTTTATCACTATGATCAGGTAGTCC	291	158	158	159	158
5	84317125	84317228		cM_nE_78_c5-SS-F	TGAAACCAAAAGCTAGGGTGAT	cM_nE_78_c5-SS-R	CTAACAGACCGGGAAGCAAA	542	114	114	111	112
19	41827639	41827742		cM_nE_80_c19-SS-F	AGTGTCACACAGAGATCTGGTTTAAT	cM_nE_80_c19-SS-R	CAGGTACAGCTATCATTGTACTTGTGT	389	n/a	n/a	263	n/a
18	40103903	40104006		cM_nE_82_c18-SS-F	AAGTCCCTGATCCTGAGAGC	cM_nE_82_c18-SS-R	TTGGTGGGGTTCTGAAAGAC	408	282	282	275	281
14	101966862	101966965		cM_nE_84b_c14-SS-F	GACCTGATTAATTATGAAATGACCTG	cM_nE_84b_c14-SS-R	TGTACTCATAAAATGAGCTGGAAGA	360	225	224	227	225
11	94790521	94790624		cM_nE_86_c11-SS-F	TCAGTCATAGCATACGGATTGTC	cM_nE_86_c11-SS-R	TGCTATGCCAAGTACACCTGA	500	364	364	363	360
1	5141670	5141773		cM_nE_88_c1-SS-F	ACATAAAAGGCGATGCTAAATGA	cM_nE_88_c1-SS-R	TTAGCCTGAGGCCTGAACAT	661	223	223	223	221
7	154465529	154465632		cM_nE_8c_c7-SS-F	TGTGCTGTGAGTTCTCTGAGG	cM_nE_8c_c7-SS-R	GATGTCAGCTGGGATTTTGC	400	270	271	273	273
13	83847978	83848078		cM_nE_90_c13-SS-F	AACACTGAAATTTACCACTGACTTT	cM_nE_90_c13-SS-R	TTGGAGTCCTATTTAGACTTAATGC	580	754	754	466	756
X	127177765	127177868		cM_nE_92_cX-SS-F	TCTCTGAGGGCAAGATTCAAC	cM_nE_92_cX-SS-R	CCATTCAACATACATGATCATACCA	392	274	274	275	273
Un	1094784	1094887		cM_nE_94_cUn-SS-F	CAGATTGGTTATCAAACTCTGCT	cM_nE_94_cUn-SS-R	TTTTCCCCTTGATACTGAAAGAA	208	400	399	393	393
4	22026036	22026139		cM_nE_98_c4-SS-F	TTGCAAGAAACATTTCCACTG	cM_nE_98_c4-SS-R	ACCCACTTCCCTTCATGGTA	481	338	338	342	342
3	139597231	139598086		139597055chr3d-ss-R	GCAGATGCACCTAATCTACTTCAA	139597055chr3d-ss-R	GGCTGCGATAATGACACCTT	856	676	676	-	-	-
geno:0967:10108346:10108449chr21				cM_k_1010_c21-EA-F	GCAGCCTTGGACTAGAGCAG	cM_k_1010_c21-EA-R	TTACCCCACCTTTCATTTTGA	470	334	334	335	346	312
geno:2151:102546113:102546216chrX				cM_k_1025_cX-EA-F	aaaatcaacagaaattaaaggagaaa	cM_k_1025_cX-EA-R	tggctcagaatttggtcttg	687	244	244	244	-	-
geno:2151:102546113:102546216chrX				cM_k_1025(2)_cX-EA-F	tttgtacacatctctctttaactgaa	cM_k_1025(2)_cX-EA-R	atcaattaccgcaagctggtt	229	100	100	99	100	-
geno:2151:102546113:102546216chrX				cM_k_1025_cX-EA-F	aaaatcaacagaaattaaaggagaaa	cM_k_1025(2)_cX-EA-R	atcaattaccgcaagctggtt	601	155	155	155	-	-
geno:2151:102546113:102546216chrX				cM_k_1025(2)_cX-EA-F	tttgtacacatctctctttaactgaa	cM_k_1025_cX-EA-R	tggctcagaatttggtcttg	315	189	189	189	189	-
geno:0843:103556042:103556145chr1				cM_k_1035_c1-EA-F	CATGCAAGGTCTCCTTTTCAA	cM_k_1035_c1-EA-R	GAGCCCCATCTCTAGCTGAA	722	586	591	590	591	570
geno:0843:103556042:103556145chr1				cM_k_1035(2)_c1-EA-F	TGTTGCTCTGCAAATTCAGG	cM_k_1035(2)_c1-EA-R	TGACTAATTTGTATCATTTGGGAAC	848	714	719	718	719	699
geno:0843:103556042:103556145chr1				cM_k_1035_c1-EA-F	CATGCAAGGTCTCCTTTTCAA	cM_k_1035(2)_c1-EA-R	TGACTAATTTGTATCATTTGGGAAC	785	648	653	652	653	633
geno:0843:103556042:103556145chr1				cM_k_1035(2)_c1-EA-F	TGTTGCTCTGCAAATTCAGG	cM_k_1035_c1-EA-R	GAGCCCCATCTCTAGCTGAA	785	652	657	656	657	636
geno:1572:105444131:105444234chr5				cM_k_1054_c5-EA-F	TGCTTTATCCCCTGTAGAAATGA	cM_k_1054_c5-EA-R	GAATGTCTGTTGGGACATGG	571	441	433	437	434	-
geno:0089:107086246:107086349chr10				cM_k_1090_c10-EA-F	TTGGTCAGAAAATGTTAAGACTGG	cM_k_1070_c10-EA-R	TGTTTCATGTCTCCCTAAAATGT	492	373	370	343	365	357
geno:0361:107314888:107314982chr13				cM_k_1073_c13-EA-F	TGCCATTGAAAAGGAAAGGA	cM_k_1073_c13-EA-R	TTTTCTCTGGGGTTGCTTTT	814	742	740	737	733	695
geno:0361:107314888:107314982chr13				cM_k_1073(2)_c13-EA-F	TCATCAAGAATGCAGCACAA	cM_k_1073(B=2)_c13-EA-R	GGTTAATCAATTTCCTTTGCTTTT	926	851	849	847	841	809
geno:0361:107314888:107314982chr13				cM_k_1073_c13-EA-F	TGCCATTGAAAAGGAAAGGA	cM_k_1073(2)_c13-EA-R	GGTTAATCAATTTCCTTTGCTTTT	1007	931	929	927	921	890
geno:0361:107314888:107314982chr13				cM_k_1073(2)_c13-EA-F	TCATCAAGAATGCAGCACAA	cM_k_1073_c13-EA-R	TTTTCTCTGGGGTTGCTTTT	733	662	660	657	653	614
geno:2158:108949392:108949495chrX				cM_k_1089_cX-EA-F	TGGTACCTATTTACTTGCAACCTTT	cM_k_1089_cX-EA-R	GCATGGAACATTTTATTGGAGA	339	222	222	222	220	222
geno:1578:112894171:112894274chr5				cM_k_1128_c5-EA-F	TTTATTTTCATGCTGCTGTGG	cM_k_1128_c5-EA-R	TGCAGAGCTGTTTGTGCTCT	466	373	373	376	330	326
geno:1006:11381973:11382075chr22				cM_k_1138_c22-EA-F	CCCACCATATCTAACAACCTTCA	cM_k_1138_c22-EA-R	CCTTGTGAATTGTGGGGAAG	329	196	196	196	199	198
geno:2162:116262432:116262535chrX				cM_k_1163_cX-EA-F	AAGAGCTTTGCACAGTAAGAGGA	cM_k_1162_cX-EA-R	TGGTTTGGATTTGCATTTCTC	399	275	275	-	-	270
geno:2163:116906385:116906488chrX				cM_k_1169_cX-EA-F	ACCCACTGTGAGCTGAACAC	cM_k_1169_cX-EA-R	TGCTTCCATCTGACACAACTG	458	323	323	323	320	323
geno:2167:121267985:121268088chrX				cM_k_1212_cX-EA-F	TCACTTTAGCCTCTGATTGGTT	cM_k_1212_cX-EA-R	TCTGAAAAGGATCACGCAGA	517	378	378/424	378	381	398
geno:2167:121267985:121268088chrX				cM_k_1212(2)_cX-EA-F	AATCTCAGCTTTCATTGCTTC	cM_k_1212(2)_cX-EA-R	TGCTGGTTTGGCCTATAATTT	552	420	420	420	420	422
geno:2167:121267985:121268088chrX				cM_k_1212_cX-EA-F	TCACTTTAGCCTCTGATTGGTT	cM_k_1212(2)_cX-EA-R	TGCTGGTTTGGCCTATAATTT	777	637	2*683	637	640	658
geno:2167:121267985:121268088chrX				cM_k_1212(2)_cX-EA-F	AATCTCAGCTTTCATTGCTTC	cM_k_1212_cX-EA-R	TCTGAAAAGGATCACGCAGA	292	161	161	161	161	162
geno:1315:123314344:123314438chr3				cM_k_1233_c3-EA-F	AAGGCCTGTTGGTGAGGATA	cM_k_1233_c3-EA-R	GCATTTGCACAGACCAAGAA	454	293	293	293	329	345
geno:0536:12604009:12604112chr16				cM_k_1260_c16-EA-F	TGGATAAGATAACAACCTGAAGC	cM_k_1260_c16-EA-R	GTACCTGCATGGCTTGACCT	837	682	681	703	698	712
geno:0536:12604009:12604112chr16				cM_k_1260(2)_c16-EA-F	GCACTGTGGCAAAGAAGATT	cM_k_1260(2)_c16-EA-R	TCTGAGCCACATTTCCAAAG	539	407	406	407	403	411
geno:1984:126109760:126109854chr8				cM_k_1261_c8-EA-F	ACATGGCCTGAGAAGCAAGT	cM_k_1261_c8-EA-R	TGCAGGACAGTAGGAGGACA	465	193	193	193	192	348
geno:1593:126634487:126634591chr5				cM_k_1266_c5-EA-F	TCTGCAGAAATGGCAAGAGA	cM_k_1266_c5-EA-R	CAGCTCTGTTCTAGGCACTGG	597	490	493	525	496	591
geno:1986:128059162:128059264chr8				cM_k_1280_c8-EA-F	GAGATGAATCACTCTTTAGGCTTT	cM_k_1280_c8-EA-R	AAGATAGTCAAATGCTTCTGAAGGT	408	278	278	279(2)	-	278
geno:0864:130305793:130305885chr1				cM_k_1303_c1-EA-F	TGGAGAACAATGGCAGGATA	cM_k_1304_c1-EA-R	GCTTCATGGTTAATCCCCTTC	575	440	440	443	443	443
geno:1718:132654475:132654577chr6				cM_k_1326_c6-EA-F	TCCCTGCCACTGAGTAGAAA	cM_k_1326_c6-EA-R	TTCACTGCAGTATCCTTATCACC	467	344	344	344	343	320
geno:1842:133952992:133953087chr7				cM_k_1339_c7-EA-F	AAGTCTAGCAGAATGGCATGG	cM_k_1339_c7-EA-R	TTTCATTTTCACCTTTATTTTGCTTA	587	462	462	472	459	458
geno:1842:133952992:133953087chr7				cM_k_1339(2)_c7-EA-F	TTTCATGGGAAGTGAGTTGC	cM_k_1339(2)_c7-EA-R	GACTTACGCTGGCATCTTCC	524	401	401	407	395	728
geno:1842:133952992:133953087chr7				cM_k_1339_c7-EA-F	AAGTCTAGCAGAATGGCATGG	cM_k_1339(2)_c7-EA-R	GACTTACGCTGGCATCTTCC	678	555	555	565	549	882
geno:1842:133952992:133953087chr7				cM_k_1339(2)_c7-EA-F	TTTCATGGGAAGTGAGTTGC	cM_k_1339_c7-EA-R	TTTCATTTTCACCTTTATTTTGCTTA	433	308	308	314	305	304
geno:0868:134715704:134715806chr1				cM_k_1347_c1-EA-F	AGTCAGCTGGGCTGCTATAA	cM_k_1347_c1-EA-R	TTTCATGTGTCTGGGTCAGC	836	708	708	708	695	709
geno:1845:135865206:135865279chr7				cM_k_1358_c7-EA-F	TGCCATTAGCATTCATGTGAG	cM_k_1358_c7-EA-R	TTTGGATGTTGCCTTGAAATTAG	365	255	255	259	-	261
geno:0625:13811671:13811774chr17				cM_k_1381_c17-EA-F	CATGTGGTATTCAGAATTGAGC	cM_k_1381_c17-EA-R	TCCCAAATTTCGCTGTCTTT	368	244	244	245	247	268
geno:0625:13811671:13811774chr17				cM_k_1381(2)_c17-EA-F	CCTTGAAGTTTCTCTCAGTAATTTTC	cM_k_1381(2)_c17-EA-R	TTTTCCCTCATTGCTGACATT	709	598	598	599	601	622
geno:0625:13811671:13811774chr17				cM_k_1381_c17-EA-F	CATGTGGTATTCAGAATTGAGC	cM_k_1381(2)_c17-EA-R	TTTTCCCTCATTGCTGACATT	640	519	519	520	522	541
geno:0625:13811671:13811774chr17				cM_k_1381(2)_c17-EA-F	CCTTGAAGTTTCTCTCAGTAATTTTC	cM_k_1381_c17-EA-R	TCCCAAATTTCGCTGTCTTT	437	323	323	2*324	326	349
geno:1603:140869772:140869866chr5				cM_k_1408_c5-EA-F	CAAAACATTGCTGAAGGAAATTA	cM_k_1408_c5-EA-R	CCCATTGAATAATCTTGGCACT	590	419	419	394	-	456
geno:0878:141861891:141861983chr1				cM_k_1418_c1-EA-F	GCCAGAGAGAAGCTAAGTAAAAGG	cM_k_1418_c1-EA-R	TCAAAGTACACTTCTGCTTCTTGA	576	473	473	473	-	470
geno:0781:14745693:14745796chr1				cM_k_1474_c1-EA-F	TGGTTTGCTGTTCTCCACAA	cM_k_1474_c1-EA-R	GCCCAATAACTTTGTCATCTTGA	339	216	-	-	226	205
geno:0296:14745855:14745958chr13				cM_k_14745_c13-EA-F	TCATAAGAGGCCCTGGAATAA	cM_k_14745_c13-EA-R	TGCCAGGTACCTTGTATAGAAAC	474	345	345	345	339	336
geno:0724:14944079:14944173chr19				cM_k_1494_c17-EA-F	GCTGAAAGGAACCTAGGACAT	cM_k_1494_c17-EA-R	GGGGTCTTGCTAAGTGACCT	250	150	150	150	150	145
geno:1616:158277079:158277182chr5				cM_k_1582_c5-EA-F	AATCACTCTGCCCCTGAAGA	cM_k_1582_c5-EA-R	AACTTTTGCAGAGGTTGGATCT	502	393	397	397	398	703
geno:1616:158277079:158277182chr5				cM_k_1582(2)_c5-EA-F	TGTGACACACTTCCTTCAAGATTTA	cM_k_1582(2)_c5-EA-R	ATGATGTGAGATAGGGATCTGTC	623	551	556	556	550	844
geno:0889:161497611:161497714chr1				cM_k_1614_c1-EA-F	ACCAGCTGCCTTTGGATAGA	cM_k_1614_c1-EA-R	TGTCTGAAAACTTGGGGACAA	470	346	346	346	346	346
geno:1351:163774024:163774097chr3				cM_k_1637_c3-EA-F	cctcggtccctatttatttgc	cM_k_1637_c3-EA-R	GGTTTGCTTTGAGGCTTGAC	574	543	543	544	537	545
geno:1351:163774024:163774097chr3				cM_k_1637(2)_c3-EA-F	cctgaaatgcttttcttctg	cM_k_1637(2)_c3-EA-R	AAAATAAATAAATAATGGGGTATCA	250	138	138	138	232	138
geno:1381:16743475:16743577chr4				cM_k_1674_c4-EA-F	AGGGCTGGTGAATACCACATAA	cM_k_1674_c4-EA-R	TTCGGGCAGATACACTCAGA	703	559	559	557	559	557
geno:0381:16964063:16964166chr14				cM_k_1696_c14-EA-F	AACAAAGTGAACTAGAAGTCAGGAGA	cM_k_1696_c14-EA-R	TTTTCTCCACTTAATTCACAGAAACTT	518	427	427	427	424	410
geno:0381:16964063:16964166chr14				cM_k_1696(2)_c13-EA-F	AAGTATTGCTGCTATTTCTGttgg	cM_k_1696(2)_c13-EA-R	GAGAAAGCCTAGCTCCATATACCA	471	379	379	379	379	367
geno:0381:16964063:16964166chr14				cM_k_1696_c14-EA-F	AACAAAGTGAACTAGAAGTCAGGAGA	cM_k_1696(2)_c14-EA-R	GAGAAAGCCTAGCTCCATATACCA	554	463	463	463	460	446
geno:0381:16964063:16964166chr14				cM_k_1696(2)_c14-EA-F	AAGTATTGCTGCTATTTCTGttgg	cM_k_1696_c14-EA-R	TTTTCTCCACTTAATTCACAGAAACTT	435	343	343	343	343	331
geno:0629:17806968:17807071chr17				cM_k_1780_c17-EA-F	TTGCATCTGGGTTTTGACTTC	cM_k_1780_c17-EA-R	TGAATGTGAATCTCTAATTATCTCAAA	387	285	285	288	287	271
geno:1203:184124107:184124187chr2				cM_k_1841_c2-EA-F	TCACAAGCCATTATGAGTCAGC	cM_k_1841_c2-EA-R	GGGGATAGGATTGAAGCAAA	560	420	420	450	-	436
geno:0909:193804798:193804900chr1				cM_k_1938_c1-EA-F	TTTTGAGATTCCTTGATTTACGTT	cM_k_1938_c1-EA-R	TTTTGAGATTCCTTGATTTACGTT	367	243	249	249	249	249
geno:0909:193804798:193804900chr1				cM_k_1938(2)_c1-EA-F	GAAAATATGTATTGCTAAGAAGCAGTT	cM_k_1938(2)_c1-EA-R	AAGGTGACTTGCCAAAAGTAATG	601	464	470	470	470	479
geno:0909:193804798:193804900chr1				cM_k_1938_c1-EA-F	TTTTGAGATTCCTTGATTTACGTT	cM_k_1938(2)_c1-EA-R	AAGGTGACTTGCCAAAAGTAATG	367	243	249	249	249	249
geno:0909:193804798:193804900chr1				cM_k_1938(2)_c1-EA-F	GAAAATATGTATTGCTAAGAAGCAGTT	cM_k_1938_c1-EA-R	TTTTGAGATTCCTTGATTTACGTT	258	-	-	-	-	-
geno:1211:198245703:198245804chr2				cM_k_1982_c2-EA-F	TGCCAGGGAACTTAGTTGAGA	cM_k_1982_c2-EA-R	CATTTGAATTGAGCAAGAAGTTT	690	562	562	560	550	861
geno:1211:198245703:198245804chr2				cM_k_1982(2)_c2-EA-F	TTGAGACTCTGTGTCTGTGGTT	cM_k_1982(2)_c2-EA-R	CACAGAACCTACCTTTAAGGATGA	358	234	234	234	231	234
geno:1211:198245703:198245804chr2				cM_k_1982_c2-EA-F	TGCCAGGGAACTTAGTTGAGA	cM_k_1982(2)_c2-EA-R	CACAGAACCTACCTTTAAGGATGA	373	249	249	249	246	249
geno:1211:198245703:198245804chr2				cM_k_1982(2)_c2-EA-F	TTGAGACTCTGTGTCTGTGGTT	cM_k_1982_c2-EA-R	CATTTGAATTGAGCAAGAAGTTT	675	547	547	545	535	846
geno:0125:19935773:19935875chr11				cM_k_1993_c11-EA-F	GGCTCAAGAATAAGCAAAACA	cM_k_1993_c11-EA-R	GCAAAAGATTGCAGAATAGGC	371	244	244	244	243	244
geno:0544:19941450:19941553chr15				cM_k_1994_c15-EA-F	TTGAATCCTGGACCAGAAAA	cM_k_1994_c15-EA-R	CAAAACTGGGAGAGTTCATCAA	659	526	520	539	534	543
geno:0544:19941450:19941553chr15				cM_k_1994(2)_c16-EA-F	GAATAGCTTTTATTCTGATT	cM_k_1994(2)_c16-EA-R	TTGATGAACTCTCCCAGTTTTG	584	445	439	458	452	464
geno:0544:19941450:19941553chr15				cM_k_1994_c15-EA-F	TTGAATCCTGGACCAGAAAA	cM_k_1994(2)_c15-EA-R	TTGATGAACTCTCCCAGTTTTG	663	526	520	539	534	543
geno:0544:19941450:19941553chr15				cM_k_1994(2)_c15-EA-F	GAATAGCTTTTATTCTGATT	cM_k_1994_c15-EA-R	CAAAACTGGGAGAGTTCATCAA	584	-	-	-	-	-
geno:0023:20409946:20410040chr10				cM_k_2040_c10-EA-F	TGGTATTTCTTTCTCTGGTGGTT	cM_k_2040_c10-EA-R	AAGGCTGAAAGCCAAAATGA	299	170	174	166	168	174
geno:0023:20409946:20410040chr10				cM_k_2040(2)_c10-EA-F	CAGCCTCCTTTCTGTCTTTTG	cM_k_2040(2)_c10-EA-R	CAGGAAGATGCTCTCCTTTCC	500	372	376	368	366	375
geno:0023:20409946:20410040chr10				cM_k_2040_c10-EA-F	TGGTATTTCTTTCTCTGGTGGTT	cM_k_2040(2)_c10-EA-R	CAGGAAGATGCTCTCCTTTCC	444	316	320	none	312	319
geno:0023:20409946:20410040chr10				cM_k_2040(2)_c10-EA-F	CAGCCTCCTTTCTGTCTTTTG	cM_k_2040_c10-EA-R	AAGGCTGAAAGCCAAAATGA	335	226	230	222	222	230
geno:0920:207712733:207712830chr1				cM_k_2077_c1-EA-F	AAGGACCCACCTGTACCACA	cM_k_2077_c1-EA-R	GACTCACAGGGCCAGAAAAG	953	819	819	813	-	841
geno:0787:21108038:21108140chr1				cM_k_2110_c1-EA-F	TTGCATTTTGTAAATGTGCTG	cM_k_2110_c1-EA-R	CCAGGAACCCATGATACAGG	543	407	410	407	2/411	408
geno:0687:21588405:21588507chr18				cM_k_2158_c18-EA-F	GCTTCATTGGGGAAAACAAA	cM_k_2158_c18-EA-R	GGGTTCAGTAACCTAGCAACAGA	945	843	842	847	843	836
geno:0687:21588405:21588507chr18				cM_k_2158(2)_c18-EA-F	TGGATGAGCTGATAAACCAAAC	cM_k_2158(2)_c18-EA-R	TTTTGTATGCCCTAGGCTGAA	337	232	229	232	235	222
geno:0971:22337474:22337568chr21				cM_k_2233_c21-EA-F	ACTTTTCTCAAATGCCACAAA	cM_k_2233_c21-EA-R	CCAAAAGTGGATGGCAGATT	533	393	393	379	395	418
geno:2003:23715079:23715182chr9				cM_k_2371_c9-EA-F	CACAGCAGCCCCAGTAGAGT	cM_k_2371-EA-R	ATTGGAAGGTGTGGGAAGAA	443	328	328	-	327	322
geno:0791:24175829:24175932chr1				cM_k_2417_c1-EA-F	TCAGCCTAGGTGTACAATTTGC	cM_k_2417_c1-EA-R	TCACAAGGTGACAGGAGAGAGA	472	345	345	347	-	345
geno:0691:24535725:24535827chr18				cM_k_2453_c18-EA-F	AGCATGGAAAGTCCATTTTCTT	cM_k_2453_c18-EA-R	CCTTCCCATCATTTTCCTCA	682	550	550	550	549	549
geno:0691:24535725:24535827chr18				cM_k_2453(2)_c18-EA-F	GAGGTGGCAGCTTTCATGAC	cM_k_2453(2)_c18-EA-R	TGAGGAAAATGATGGGAAGG	587	455	455	455	454	454
geno:0304:26295972:26296074chr13				cM_k_2629_c13-EA-F	TCACTTGATGTTAATAAATACTGAGCA	cM_k_2629_c13-EA-R	AATTTGAGAATGATTAGCTTCTGTTTT	369	242	-	242	242	241
geno:0304:26295972:26296074chr13				cM_k_2629(2)_c13-EA_F	CTGAGCAACAAGTAGAACAGTCC	cM_k_2629(2)_c13-EA-R	GAGTTAAGATCATTTTGAAAGGAAA	286	159	-	159	159	158
geno:0304:26295972:26296074chr13				cM_k_2629_c13-EA-F	TCACTTGATGTTAATAAATACTGAGCA	cM_k_2629(2)_c13-EA-R	GAGTTAAGATCATTTTGAAAGGAAA	306	179	-	179	179	none
geno:0304:26295972:26296074chr13				cM_k_2629(2)_c13-EA-F	CTGAGCAACAAGTAGAACAGTCC	cM_k_2629_c13-EA-R	AATTTGAGAATGATTAGCTTCTGTTTT	349	222	-	222	222	221
geno:0739:28219269:28219372chr19				cM_k_2821_c19-EA-F	TCAGCTCTGAATTCTCTTCTACC	cM_k_2821_c19-EA-R	TTGCTCCACCTAGTGGATTTC	667	4*564	546	542	547	540
geno:0795:29394728:29394825chr1				cM_k_2939_c1-EA-F	AAATGCCACATGTTGTCTGA	cM_k_2939_c1-EA-R	TCCAGTTTCAGTTCCTGCTG	593	414	414	411	411	488
geno:0795:29394728:29394825chr1				cM_k_2939(2)_c1_EA-F	AGAGGTGTGAATAACCCAAATG	cM_k_2939(2)_c1-EA-R	CACTTCCTTAGGCAAGAACAAGA	712	527	527	524	524	608
geno:0106:2980217:2980320chr11				cM_k_2980_c11-EA-F	tttccatttggactcatcaag	cM_k_2980_c11-EA-R	TCTAGTGCAGGAGGCTCTGG	767	704	703	702	709	649
geno:0106:2980217:2980320chr11				cM_k_2980(2)_c11-EA-F	catcctaataatttgaatcaatgaca	cM_k_2980(2)_c11-EA-R	AAACCCTCCCTCCAATCAGT	281	166	165	162	165	162
geno:1756:31320016:31320119chr7				cM_k_3132_c7-EA-F	TAGTTGGGCCACTCAACCTT	cM_k_3132_c7-EA-R	TGCATATTAAGCCACACACCT	724	589	589	599	606	586
geno:0311:32856778:32856880chr13				cM_k_3285_c13-EA-F	GCACACCAACTTTGTTTTCA	cM_k_3285_c13-EA-R	TCTTCAGAAAGCCCAACACC	708	605	589	595	594	566
geno:0311:32856778:32856880chr13				cM_k_3285(2)_c13-EA-F	TCCAGCAGAATAACCCCTGT	cM_k_3285(2)_c13-EA-R	ATCCTGTCCCACCTGATTTG	631	530	514	518	519	488
geno:0394:33322355:33322458chr14				cM_k_3332_c14-EA-F	ATGCCTTTTAAACTTGTCACCA	cM_k_3332_c14-EA-F	AAGGATCCCTGGCTCTTCTC	604	508	509	510	508	488
geno:0448:3430343:3430445chr15				cM_k_3430_c15-EA-F	AGTGGCCTCCAGTGTTTGTC	cM_k_3430_c15-EA-R	TGTCTAATGAAACACCTGTGGAA	849	772	769	765	768	787
geno:2017:35037735:35037812chr9				cM_k_3503_c9-EA-F	CAAGGAGAATGTATTTTGATGCT	cM_k_3503_c9-EA-R	CCCACAACAGTTTGCTAGGG	581	427	426	426	426	586
geno:0744:35605713:35605816chr19				cM_k_3560_c19-EA-F	CAGACCTGGGCTTTGAAGAA	cM_k_3560-EA-R	GACGGTTCATTAACCTGGTG	226	92	92	92	92	86
geno:0003:3800765:3800868chr10				cM_k_3800_c10-EA-F	CATTTTGAGATTTTAAACTTAATCAGG	cM_k_3800_c10-EA-R	CCAGGATCCAAACGTCATCT	405	298	298	298	298	280
geno:0641:38259136:38259238chr17				cM_k_3826_c17-EA-F	TGTTGGGAGTGCTGGAAGAT	cM__3825_c17-EA-R	GAATAAATGGGCAGAACAGCA	273	149	149	151	151	153
geno:0236:40482032:40482129chr12				cM_k_4048_c12-EA-F	TGACCGGAAAATGACACAAA	cM_k_4048_c12-EA-R	TAATCCCAGTGGTGGAGCTT	641	501	501	499	499	506
geno:0136:40755417:40755520chr13				cM_k_4075_c13-EA-F	TGACTATCTTTACTGCAATACTCACTT	cM_k_4075_c13-EA-R	CAGGGAGGTTAAAAGAGTTGTCA	600	459	459	459	-	462
geno:0614:4094077:4094171chr17				cM_k_4094_c17-EA-F	CGCTTTCCCTTTTATTTTGC	cM_k_4094_c17-EA-R	TGTCATCAGACTTGGGGCTA	683	555	557	556	-	661
geno:0614:4094077:4094171chr17				cM_k_4094(2)_c17_EA-F	TTTCCATTTTAATTCTCTAATTCTG	cM_k_4094(2)_c17-EA-R	TCACAGTGTGGCTGTGAGAA	672	557	554	558	-	546
geno:0614:4094077:4094171chr17				cM_k_4094_c17-EA-F	CGCTTTCCCTTTTATTTTGC	cM_k_4094(2)_c17-EA-R	TCACAGTGTGGCTGTGAGAA	942	810	809	812	-	919
geno:0614:4094077:4094171chr17				cM_k_4094(2)_c17-EA-F	TTTCCATTTTAATTCTCTAATTCTG	cM_k_4094_c17-EA-R	TGTCATCAGACTTGGGGCTA	413	302	302	302	-	288
geno:0752:42227794:42227897chr19				cM_k_4222_c19-EA-F	tccttgatagcaaagccaaac	cM_k_4222_c19-EA-R	CCATatctagtgagatcaacattgc	396	260	260	260	260	258
geno:0710:42549554:42549657chr18				cM_k_4254_c18-EA-F	TATTGCATGAGGCTGAGGTTT	cM_k_4254_c18-EA-R	AGCAAAGACATGAAATCAACCTA	501	371	371	388375	374	370
geno:0710:42549554:42549657chr18				cM_k_4254(2)_c18-EA-F	GCAAACATTTAGCTTCCCTACC	cM_k_4254(2)_c18-EA-R	TCTGTGGAAAGCAGTTTGGA	780	651	649	-	660	649
geno:0710:42549554:42549657chr18				cM_k_4254_c18-EA-F	TATTGCATGAGGCTGAGGTTT	cM_k_4254(2)_c18-EA-R	TCTGTGGAAAGCAGTTTGGA	655	542/528	525/499	-	528	524
geno:0710:42549554:42549657chr18				cM_k_4254(2)_c18-EA-F	GCAAACATTTAGCTTCCCTACC	cM_k_4254_c18-EA-R	AGCAAAGACATGAAATCAACCTA	626	497	495	-	506	495
geno:0671:4324312:4324415chr18				cM_k_4324_c18-EA-F	GGTTTTCCTGGAAGAATACAGGT	cM_k_4324_c18-EA-R	TCAAAATATTGCTGAATGAGTATGT	310	164	164	164	164	164
geno:0995:43526348:43526451chr21				cM_k_4353_c21-EA-F	GGTGCTTAATTAGCCCACAA	cM_k_4352_c21-EA-R	GATGAGCAAGTCTCCCAAGG	735	633	633	649	636	617
geno:0996:44070890:44070992chr21				cM_k_4407_c21-EA-F	ATGATTCGGCGGTATTTCAT	cM_k_4407_c21-EA-R	ATTCCCATCTTTACTTCATAGTCTTT	830	707	712	-	699	697
geno:0996:44070890:44070992chr21				cM_k_4407(2)_c21-EA-F	GGGTGCAACAGTTTATTCTGC	cM_k_4407(2)_c21-EA-R	TCTATGTTTCAATTGGCTGTTAATG	381	265	266	-	265	258
geno:0996:44070890:44070992chr21				cM_k_4407_c21-EA-F	ATGATTCGGCGGTATTTCAT	cM_k_4407(2)_c21-EA-R	TCTATGTTTCAATTGGCTGTTAATG	615	489	490	-	484	481
geno:0996:44070890:44070992chr21				cM_k_4407(2)_c21-EA-F	GGGTGCAACAGTTTATTCTGC	cM_k_4407_c21-EA-R	ATTCCCATCTTTACTTCATAGTCTTT	606	483	488	-	480	474
geno:0764:47262380:47262483chr19				cM_k_4726_c19-EA-F	ATTCCTTGATAGCAATGCAGA	cM_k_4726_c19-EA-R	GGGAGGGAAATGACAGAGAA	299	wouldn't work	161	163	163	-
geno:0805:47953441:47953544chr1				cM_k_4795_c1-EA-F	AAAGCAGTATTACCTGAAAGCGTTA	cM_k_4795_c1-EA-R	TTTGTAAACCAGTCTTCTAAACCCTTA	271	150	150	148	148	145
geno:0805:47953441:47953544chr1				cM_k_4795(2)_c1-EA-F	GCTTAACTCTGCAATGTGTTTGA	cM_k_4795(2)_c1-EA-R	GCAGACACTCATGTTGGTACA	479	369	369	367	370	364
geno:1255:48378909:48379012chr3				cM_k_4837_c3-EA-F	TTGTGCTGAATGGAATTTGG	cM_k_4837_c3-EA-R	ACATACAGGCCATGGGAACT
geno:1106:48657205:48657308chr2				cM_k_4865_c2-EA-F	CCAAAGTGGGAGGATCACTT	cM_k_4865_c2-EA-R	CCACAGCTCCTGGCTAGTTC	245	108	108	108	108	108
geno:2032:49699939:49700036chr9				cM_k_4969_c9-EA-F	TTTCAGATCACCATAATAAAGCAAA	cM_k_4969_c9-EA-R	TTTACACTTGCTGAAGGCTCA	346	216	216	219	208/216	219
geno:2032:49699939:49700036chr9				cM_k_4969(2)_c9-EA-F	ATATGATTCGCCCACGTGTA	cM_k_4969(2)_c9-EA-R	AAGGCAGGATACTCCACCAG	445	315	315	-	-	318
geno:2032:49699939:49700036chr9				cM_k_4969_c9-EA-F	TTTCAGATCACCATAATAAAGCAAA	cM_k_4969(2)_c9-EA-R	AAGGCAGGATACTCCACCAG	373	243	243	-	-	246
geno:2032:49699939:49700036chr9				cM_k_4969(2)_c9-EA-F	ATATGATTCGCCCACGTGTA	cM_k_4969_c9-EA-R	TTTACACTTGCTGAAGGCTCA	418	288	288	-	-	291
geno:0925:4971143:4971245chr20				cM_k_4971_c20-EA-F	GGAATTCCCCAACAAATTCA	cM_k_4971_c20-EA-R	TTACCCAACCCAAGTGTCAA	740	634	633	634	633	609
geno:0925:4971143:4971245chr20				cM-k_4971(2)_c20-EA-F	TCTCTAGTTTCACTTTCCAGTTTCA	cM_k_4971(2)_c20-EA-R	GGTTGAGAAACTCACCATCTAGG	382	275	275	275	275	251
geno:0925:4971143:4971245chr20				cM_k_4971(2)_c20-EA-F	CCAAATGAGGATGAATTCCAG	cM_k_4971(2)_c20-EA-R	CCGCATTAGAATTGTGTCTCAG	339	230	230	230	230	206
geno:0615:4983874:4983976chr17				cM_k_4983_c17-EA-F	CCTTTAGTTTTCTTTAAGCAAGCAG	cM_k_4983_c17-EA-R	AAGCTGGAGAAACAGACAGAGA	484	364	365	365	365	362
geno:0615:4983874:4983976chr17				cM_k_4983(2)_c17-EA-F	TTTCCAGGTGTTGTCTGTGAG	cM_k_4983(2)_c17-EA-R	TTGGCTAATGCAATCATGGA	431	309	309	309	309	308
geno:0141:50636620:50636722chr11				cM_k_5063_c11-EA-F	TCCTGCTATTCTGTCCCAAGA	cM_k_5063_c11-EA-R	CTGAACTGGCAACAGCTGAA	905	682	678	680	695	697
geno:0652:52043296:52043373chr17				cM_k_5204_c17-EA-F	TTTTACTTGAAGCCAATGCTCA	cM_k_5204_c17-EA-R	GTGGGCTACAGAATGGGTGT	418	299/311	299/311	314/299	671/318	435
geno:0652:52043296:52043373chr17				cM_k_5204(2)_c17-EA-F	TCATTGATGAAGGTGGCTACA	cM_k_5204(2)_c17-EA-R	TCCCCATCAGAGTAATTGGA	518	419	419	416	419	554
geno:0652:52043296:52043373chr17				cM_k_5204_c17-EA-F	TTTTACTTGAAGCCAATGCTCA	cM_k_5204(2)_c17-EA-R	TCCCCATCAGAGTAATTGGA	363	246	246	246	246	380
geno:0652:52043296:52043373chr17				cM_k_5204(2)_c17-EA-F	TCATTGATGAAGGTGGCTACA	cM_k_5204_c17-EA-R	GTGGGCTACAGAATGGGTGT	573	472	472	469	472	609
geno:0654:53345010:53345113chr17				cM_k_5334_c17-EA-F	TCTGGTTTACTATGTGCCAAACA	cM_k_5334_c17-EA-R	GTGTATTGGACCCAGGCATA	394	286	286	285	285	288
geno:0654:53345010:53345113chr17				cM_k_5334(2)_c17-EA-F	AGAAGGATGAAAGTCTGAAGGAG	cM_k_5334(2)_c17-EA-R	GGAATCTCTGTGAGGGCTGT	421	316	316	315	316	315
geno:0325:54289712:54289815chr13				cM_k_5428_c13-EA-F	TTTCCTTGTCCTCCACACTTT	cM_k_5428_c13-EA-R	TGTGAAATTTACTTTTGGAAGAAAGA	295	173	170	168	165	151
geno:0574:54363412:54363514chr16				cM_k_5436_c16-EA-F	AAAAGCATGTGTATGGTGCTT	cM_k_5436_c16-EA-R	TGCCCTTAATCCCAAGTCAA	584	463	463	463	462	459
geno:0328:57546377:57546477chr13				cM_k_5754_c13-EA-F	TGAGCACTCATAGGCTCTTCAC	cM_k_5754_c13-EA-R	ATAGCGAGTGCTGAAGAGAAGC	699	581	581	581	578	703
geno:0328:57546377:57546477chr13				cM_k_5754(2)_c13-EA-F	AGGTGGGATGTTTGCTGAGT	cM_k_5754(2)_c13-EA-R	AAATCAAAGTCTATGCACTTGAGAA	326	205	205	205	205	330
geno:1408:58582258:58582359chr4				cM_k_5858_c4-EA-F	TTCTTCCCAGTTCTTTGCTTTT	cM_k_5858_c4-EA-R	GCACAGAAAGAACAACTTCACC	340	228	228	230	230	229
geno:0332:62235728:62235830chr13				cM_k_6223_c13-EA-F	TAATGGTTTGCATAGTCAGAAAAT	cM_k_6223_c13-EA-R	ATGTCCCTTCACAAGCCAAG	249	121	121	121	121	121
geno:1116:62863917:62864020chr2				cM_k_6286_c2-EA-F	GGGGAATAACCCCAGAAGAA	cM_k_6286_c2-EA-R	TCCTTCTCCAGCAAGAAGAC	750	630/631	630	629	604	621
geno:1922:64170081:64170184chr8				cM_k_6417_c8-EA-F	TTGAGTTTATAATTTGGAGCCTGA	cM_k_6417_c8-EA-R	TGTATGCTGCTTATTTGGGATTA	640	1074/543	1078/537	1093/539	1092/538	518
geno:1922:64170081:64170184chr8				cM_k_6417(2)_c8-EA-F	CCAAGAAGGTGTTACAATTGAGTT	cM_k_6417(2)_c8-EA-R	GCCAATTAGATTAAGAAAAGAATGAA	523	420	420	4139/420	419	401
geno:1267:64631405:64631496chr3				cM_k_6463_c3-EA-F	CAAAGTTGACCACTTGGACTCA	cM_k_6463_c3-EA-R	TCAAAAGAATTAACACATGTAAAGCA	666	525	525	526	526	920
geno:1267:64631405:64631496chr3				cM_k_6463(2)_c3-EA-F	GCTTAGGGAAAGATTTGTTACAGAA	cM_k_6463(2)_c3-EA-R	GGACATTAATTATATAACCAGTTAGCA	341	202	202	202	202	394
geno:1267:64631405:64631496chr3				cM_k_6463_c3-EA-F	CAAAGTTGACCACTTGGACTCA	cM_k_6463(2)_c3-EA-R	GGACATTAATTATATAACCAGTTAGCA	475	335	335	335	335	528
geno:1267:64631405:64631496chr3				cM_k_6463(2)_c3-EA-F	GCTTAGGGAAAGATTTGTTACAGAA	cM_k_6463_c3-EA-R	TCAAAAGAATTAACACATGTAAAGCA	532	392	392	393	393	786
geno:1528:65701532:65701628chr5				cM_k_6570_c5-EA-F	CACATAGGGAAGGGGAGTCA	cM_k_6570_c5-EA-R	TCTGTGCAGATGCCTAGCAG	915	827	843	824	770	800
geno:1789:67886869:67886972chr7				cM_k_6788_c7-EA-F	GGCAATTACAAAACTCATTTACTCC	cM_k_6788_c7-EA-R	GCATAGTTTTGGCTTCATGC	639	511	509	510	510	522
geno:0250:67900926:67901029chr12				cM_k_6790_c12-EA-F	TGTCTTTATGATTTTGTAGTTGTGTCA	cM_k_6790_c12-EA-R	GTCAAATTGCCTACCAAGCA	706	571	577	563	-	582
geno:0423:68723424:68723527chr14				cM_k_6872_c14-EA-F	GCTCAAATTATCCCATCTTTGG	cM_k_6872_c14-EA-R	GGGGAAGAGGCTCAGAAATC	601	489	489	489	490	473
geno:0155:69678081:69678184chr11				cM_k_6967_c11-EA-F	CCAAAGGTGAGAATGATTCCTG	cM_k_6967_c11-EA-R	TCTCTGCGGGACTTAATGGA	262	129	129	129	129	130
geno:0663:71546381:71546484chr17				cM_k_7154_c17-EA-F	CAGTCTCCTTGGGGACAGAG	cM_k_7154_c17-EA-R	GGATCTCTCATGGCTTGGTG	680	572	573	573	560	556
geno:1416:71723547:71723627chr4				cM_k_7172_c4-EA-F	GCTGTAGCTATGAGTGTGAACG	cM_k_7172_c4-EA-R	TGAGGTTTACGAACCACAAAACT	233	126	126	126	126	124
geno:1416:71723547:71723627chr4				cM_k_7172(2)_c4-EA-F	GAAATGATTTGCAGTGTGGAG	cM_k_7172(2)_c4-EA-R	ACCCTGAGGTTTACGAACCA	312	205	205	205	205	203
geno:0816:72532260:72532363chr1				cM_k_7253_c1-EA-F	TTACCAGGGGCATGTAGAGA	cM_k_7253_c1-EA-R	GGCTTCTCAGACAGCACTCC	843	711	711	712	710	711
geno:0816:72532260:72532363chr1				cM_k_7253(2)_c1-EA-F	GATGTCCTTACATTGGCCTCTC	cM_k_7253(2)_c1-EA-R	CATTCCTTGGCCTCTTCTCTC	691	554	554	554	554	560
geno:0341:76141230:76141334chr13				cM_k_7614_c13-EA-F	CTGGTCAGCACTTGACAACC	cM_k_7614_c13-EA-R	GTGGCTAGACTGCCTTCCAA	539	399	399	399	399	386
geno:1125:78202789:78202891chr2				cM_k_7820_c2-EA-F	TGCCTTTAGCTCTACATTCAGAT	cM_k_7820_c2-EA-R	CAGCTACCTCCACTCACTGC	388	265	267	268	268	269
geno:0595:79681092:79681195chr16				cM_k_7968_c16-EA-F	CCACATTAGCCAGCATTGTC	cM_k_7968_c16-EA-R	AATTTCAGGGAGGCAGTTGA	574	428	428	428	429	430
geno:0345:79825539:79825632chr13				cM_k_7982_c13-EA-F	GGAATGCAGGTGGAATGTCT	cM_k_7982_c13-EA-R	CCACCTTTCTGGGTTTCAGT	332	206	206	206	202	330
geno:0345:79825539:79825632chr13				cM_k_7982(2)_c13-EA-F	CAAACAGCTGGGATCTTGAA	cM_k_7982(2)_c13-EA-R	CCTTTCTGGGTTTCAGTTTCT	386	260	260	260	256	384
geno:0261:81236569:81236672chr12				cM_k_8123_c12-EA-F	TTACACTCTGCAGTGGTCAAAA	cM_k_8123_c12-EA-R	CAATTAGCAATGTTCATTATAGTAGGC	388	270	-	266	266	260
geno:1540:81552962:81553065chr5				cM_k_8155_c5-EA-F	TTGCTTCTACCAAATTCAATGAGA	cM_k_8155_c5-EA-R	TCTCTCTAGGTTCCTAACATAGCAT	-	-	-	-	-	-
geno:1540:81552962:81553065chr5				cM_k_8155(2)_c5-EA-F	CCATGTTTGCATTGCTCAGA	cM_k_8155(2)_c5-EA-R	TCCACATTAATGAATTGGCATC	595	453	453	-	460	457
geno:1274:82197856:82197959chr3				cM_k_8219_c3-EA-F	CCTTCAAAACTGACCTTCAGTACA	cM_k_8219_c3-EA-R	TTCTAGGCCTTTCTGGTGGA	687	560	563	565	-	559
geno:1541:82426085:82426188chr5				cM_k_8242_c5-EA-F	TCCAGAAGTGCCCTGGTTAG	cM_k_8242_c5-EA-R	GGTGGGTTACTTGATGCAAA	558	416	417	417	418	429
geno:0510:83303356:83303459chr15				cM_k_8330_c15-EA-F	GGCATCTGAAAGACCCTTCC	cM_k_8330_c15-EA-R	TGTTCCCATGGACAGATGAT	589	453	453	453/453/453	451	450
geno:0510:83303356:83303459chr15				cM_k_8330(2)_c15-EA-F	AGCARGACAAGACCTRRCAACC	cM_k_8330(2)_c15-EA-R	TGCGATGTTATTTGTGAGATG	561	432	432	432	431	432
geno:0598:84071452:84071536chr16				cM_k_8407_c16-EA-F	TGAGCACTCTGACCCTGAAA	cM_k_8407_c16-EA-R	GCACTTTCTCCAACTCAAATAGAA	689	596	596	595	578	720
geno:1691:85172768:85172871chr6				cM_k_8517_c6-EA-F	attgcaacccacagtttgaa	cM_k_8517_c6-EA-R	CAGTGGGGAGAAGCACAGTT	516	385	385	385	385	698
geno:1280:86479677:86479780chr3				cM_k_8647_c3-EA-F	TTCTTTATCCATTTGCATTAGGC	cM_k_8647_c3-EA-R	GGGCTAGAATCTCTTCTATGCAG	657	545	545	509	548	525
geno:0072:86761726:86761829chr10				cM_k_8676_c10-EA-F	CAGCTGCTGGAGACACAATC	cM_k_8676_c10-EA-R	ATCCACTATTGATACCTCCTCTTAAT	629	531	527	530	531	504
geno:0517:88855573:88855670chr15				cM_k_8885_c15-EA-F	AGGCTCGAAGACCAAGTGTT	cM_k_8885_c15-EA-R	CTTTTGCTAAGCTTCTGCTTCT	365	242	242	242	242	362
geno:0517:88855573:88855670chr15				cM_k_8885(2)_c15-EA-F	GAACAATGCTGCTTTTACCACA	cM_k_8885(2)_c15-EA-R	TGGACTTGGTTTAATTGTGACTTC	971	838	840	836	836	967
geno:1738:9062859:9062962chr7				cM_k_9062_c7-EA-F	CACCACTGACAACCATGAAAA	cM_k_9062_c7-EA-R	GGCAAGCTCTTACCTGATGG	823	697	682	698	700	690
geno:0078:93037787:93037889chr10				cM_k_9303_c10-EA-F	TTGCTCAACTATGTCAGGAGATG	cM_k_9303_c10-EA-R	AAAGGACAGGCAGCCAGTAA	387	255	255	255	255	250
geno:0079:93105855:93105958chr10				cM_k_9310_c10-EA-F	TCTTTGATTTCCAGGACCTAGC	cM_k_9310_c10-EA-R	CCAACAACTTATAAAACTCTGGAATG	699	278	278	281	-	566
geno:1940:93275361:93275463chr8				cM_k_9372_c8-EA-F	TGACATTTCTGGGAGATTCTCTT	cM_k_9372_c8-EA-R	TCATTAAGCCTGGGTCTTCAC	704	780	774	-	573	578
geno:1940:93275361:93275463chr8				cM_k_9372(2)_c8-EA-F	AACAATGCATTCATCAGGAAA	cM_k_9372(2)_c8-EA-R	CAGCCAATAGCAAACCAGAA	682	767	761	-	561	555
geno:1940:93275361:93275463chr8				cM_k_9372_c8-EA-F	TGACATTTCTGGGAGATTCTCTT	cM_k_9372(2)_c8-EA-R	CAGCCAATAGCAAACCAGAA	880	966	960	-	759	754
geno:1940:93275361:93275463chr8				cM_k_9372(2)_c8-EA-F	AACAATGCATTCATCAGGAAA	cM_k_9372_c8-EA-R	TCATTAAGCCTGGGTCTTCAC	506	581	575	-	375	379
geno:0834:93753411:93753512chr1				cM_k_9375_c1-EA-F	CATACCAATAGAAAGAGACCATGA	cM_k_9375_c1-EA-R	GGATGTTTAGTACCATCCTTGTTC	536	403	403	399	411	705
geno:0441:94678102:94678206chr14				cM_k_9467_c14-EA-F	TGACTTTCAAAATGAGGTTCTTGA	cM_k_9467_c14-EA-R	GACAGGCGACACACAAACAA	699	370	370	370	365	561
geno:0441:94678102:94678206chr14				cM_k_9467(2)_c14-EA-F	GCATTCTCTAAGAGGTCCCAGTT	cM_k_9467(2)_c14-EA-R	ATCACAGCACAGCAGAAAACTC	927	608	608	608	574	797
geno:0441:94678102:94678206chr14				cM_k_9467_c14-EA-F	TGACTTTCAAAATGAGGTTCTTGA	cM_k_9467(2)_c14-EA-R	ATCACAGCACAGCAGAAAACTC	892	573	573	573	539	762
geno:0441:94678102:94678206chr14				cM_k_9467(2)_c14-EA-F	GCATTCTCTAAGAGGTCCCAGTT	cM_k_9467_c14-EA-R	GACAGGCGACACACAAACAA	734	405	405	405	400	596
geno:0374:9473803:9473906chr14				cM_k_9473_c14-EA-F	CACCCATGCTGAAACTGATG	cM_k_9473_c14-EA-R	GCATTGGGTAACAGCCAAAT	429	316	315	314	316	317
geno:0268:94946985:94947088chr12				cM_k_9494_c12-EA-F	GTGCTAACTCTGACCGAAACTC	cM_k_9494_c12-EA-R	ATTGGCAATTCCTCTACACATT	489	350	363	-	351	349
geno:1698:95547068:95547170chr6				cM_k_9554_c6-EA-F	CTCAGTCACACCAGCCTCTG	cM_k_9554_c6-EA-R	TGCAGCTCAGTTCTTTTAATCC	488	360	365	361	367	359
geno:1134:97693181:97693283chr2				cM_k_9769_c2-EA-F	AAAGTTCCTTTAGCCCTGGA	cM_k_9769_c2-EA-R	TTTTGTATTTGTTCCATGATAAATTG	370	214	214	218	211	221
geno:1134:97693181:97693283chr2				cM_k_9769(2)_c2-EA-F	CCAAAATGGCTATCTGAAATACA	cM_k_9769(2)_c2-EA-R	TGTCCGTGATTAGACAGGTAACATA	783	633	633	639	719	637
geno:0186:98781191:98781294chr11				cM_k_9878_c11-EA-F	TCCCTACCAGGAAGGACAGA	cM_k_9878_c11-EA-R	GCAAATTATGGAAAGGCAAA	279	153	153	153	154	153
geno:0444:99757992:99758096chr14				cM_k_9975_c14-EA-F	TTCTCTAGGAAACTCTGACTGACC	cM_k_9975_c14-EA-R	CTGCTTTGTGTTTGCTCTGG	494	366	366	366	364	369
chr18:4647414-4647712				cM_nE_13_c18-EA-F	GATAAAATAAATATCACTGACTCAGCA	cM_nE_13_c18-EA-R	GGGGACTTTAATCAACAGCATC	299	175	175	-	-	-
chr11:9725186-9725674				cM_nE_25_c11-EA-F	TCCCAGAATCATGTCACCTCT	cM_nE_25_c11-EA-R	ACAGTCCCATGGGGTAGATG	489	369	369	369	361	-
chr11:9725186-9725674				cM_nE_25(2)_c11-EA-F	GGCACCCCTGAACACATATT	cM_nE_25(2)_c11-EA-R	TTTAATGCGGAACAAACAGAA	527	406	406	406	387	399
chr8:118335189+118335431				cM_nE_27_c8-EA-F	CACACAAAGTCAAATGCACCT	cM_nE_27_c8-EA-R	CCCTGATTAAAATGCCTACCA	243	113	113	113	113	-
chr8:28931156-28931842				cM_nE_37_c8-EA-F	CAACATGTGCTGCCTCAAGT	cM_nE_37_c8-EA-R	CACAGGATCCTAAAGGCATGA	687	556	556	556	558	-
chr22:48994965-48995416				cM_nE_39_c22-EA-F	ACCTAAGCAGCCCTGGAGAC	cM_nE_39_c22-EA-R	AGCGTCCAAGAACAATCACA	452	330	330	330	329
chr5:89479211+89479806				cM_nE_43_c5-EA-F	GCCTGGACAACAGCTTTCTT	cM_nE_43_c5-EA-R	TGACATGCTCTGTGATCCTCA	596	474	473	476	471	-
chr18:13884096-13884452				cM_nE_5_c18-EA-F	GGTGATGTGTCAGAGCGTGT	cM_nE_5_c18-EA-R	CCCTTTGGCTTTGAAGAAAAT	357	214	214	215	214	-
chr2:166882413-166882774				cM_nE_67_c2-EA-F	GGCAGAAAGTGCACTGAACC	cM_nE_67_c2-EA-R	AGTGGAAATTGGAGCCATGA	362	230	230	231	230	-
chr11:54016614-54017057				cM_nE_71_c11-EA-F	TGTCTGTGGATGTGACTTCATTC	cM_nE_71_c11-EA-R	CAGAGTAAATGTATATGCTGGAAGG	444	332	332	330	332	-
chr3:111748719+111749112				cM_nE_79_c3-EA-F	TTGTAAAATAGACAAGGAAACCTCTG	cM_nE_79_c3-EA-R	CTGAGGGCAGGACAAGAAAT	394	272	270	273	273	-
